# Supplementary material
Source: PubMed Central journal article supplement (PMC4785507)
Supplement: ct5b01046_si_001.pdf [file ct5b01046_si_001.pdf]

# Supporting information for: Semiempirical Quantum-Chemical Orthogonalization-Corrected Methods: Theory, Implementation, and Parameters

Pavlo O. Dral, Xin Wu, Lasse Spörkel, Axel Koslowski, Wolfgang Weber,<sup>†</sup>  
Rainer Steiger,<sup>‡</sup> Mirjam Scholten,<sup>¶</sup> and Walter Thiel\*

*Max-Planck-Institut für Kohlenforschung, Kaiser-Wilhelm-Platz 1, 45470 Mülheim an der  
Ruhr, Germany*

E-mail: thiel@kofo.mpg.de

## Contents

|          |                                                                                          |            |
|----------|------------------------------------------------------------------------------------------|------------|
| <b>1</b> | <b>Tables: Numerical Results for Individual Molecules and Properties</b>                 | <b>S4</b>  |
| <b>2</b> | <b>Figures: Reference and Optimized SQC Geometries of Selected Noncovalent Complexes</b> | <b>S33</b> |
| <b>3</b> | <b>Additional Statistical Evaluations for RM1</b>                                        | <b>S38</b> |

---

\*To whom correspondence should be addressed

<sup>†</sup>Current address: BASF, Rue Marie de Bourgogne 58, 1000 Brussels, Belgium

<sup>‡</sup>Current address: Arbentalstrasse 204, 8045 Zürich, Switzerland

<sup>¶</sup>Current address: Leberberg 11, 65193 Wiesbaden, Germany

## List of Tables

|     |                                                                                                                                                                                                                                                                                       |     |
|-----|---------------------------------------------------------------------------------------------------------------------------------------------------------------------------------------------------------------------------------------------------------------------------------------|-----|
| S1  | Benchmark Results for the CHNO Data Set. Heats of Formation . . . . .                                                                                                                                                                                                                 | S5  |
| S2  | Benchmark Results for the CHNO Data Set. Ionization Potentials . . . . .                                                                                                                                                                                                              | S9  |
| S3  | Benchmark Results for the CHNO Data Set. Relative Energies . . . . .                                                                                                                                                                                                                  | S11 |
| S4  | Benchmark Results for the CHNO Data Set. Barriers . . . . .                                                                                                                                                                                                                           | S12 |
| S5  | Benchmark Results for the FLUOR Data Set. Heats of Formation . . . . .                                                                                                                                                                                                                | S14 |
| S6  | Benchmark Results for the FLUOR Data Set. Ionization Potentials . . . . .                                                                                                                                                                                                             | S16 |
| S7  | Mean Absolute Errors of the Interaction Energies for the S22 and S66x8<br>Benchmark Sets from Single-Point MNDO, AM1, PM3, PM6, and OM $x$ Cal-<br>culations at the Reference Geometries . . . . .                                                                                    | S17 |
| S8  | Mean Absolute Errors in Selected Interatomic Distances and Angles from<br>MNDO, AM1, PM3, PM6, and OM $x$ Optimizations for the S22 Set . . . . .                                                                                                                                     | S18 |
| S9  | Benchmark Results for the S22 Data Set. Interaction Energies . . . . .                                                                                                                                                                                                                | S19 |
| S10 | Benchmark Results for the S66x8 Data Set. Interaction Energies . . . . .                                                                                                                                                                                                              | S21 |
| S11 | Mean Absolute Errors in Calculated Heats of Formation, Relative Energies<br>and Barriers (kcal/mol), Bond Lengths (Å), Bond Angles (degree), Ionization<br>Potentials (eV), and Dipole Moments (D) for the CHNO Set and Its Subsets:<br>MNDO, AM1, RM1, PM $x$ , and OM $x$ . . . . . | S39 |
| S12 | Mean Absolute Errors in Calculated Heats of Formation (kcal/mol), Bond<br>Lengths (Å), Bond Angles (degree), Ionization Potentials (eV), and Dipole<br>Moments (D) for the FLUOR Set and Its Subsets: MNDO, AM1, RM1, PM $x$ ,<br>and OM $x$ . . . . .                                | S40 |

## List of Figures

|    |                                                                                                       |     |
|----|-------------------------------------------------------------------------------------------------------|-----|
| S1 | Reference, OM $x$ -D $n$ , and PM7 Geometries of the Methane Dimer from the<br>S22 Data Set . . . . . | S33 |
|----|-------------------------------------------------------------------------------------------------------|-----|

|    |                                                                                                                    |     |
|----|--------------------------------------------------------------------------------------------------------------------|-----|
| S2 | Reference, $OMx-Dn$ , and PM7 Geometries of the T-Shaped Benzene Dimer<br>from the S22 Data Set . . . . .          | S34 |
| S3 | Reference, $OMx-Dn$ , and PM7 Geometries of the Indole···Benzene Dimer<br>from the S22 Data Set . . . . .          | S35 |
| S4 | Reference, $OMx-Dn$ , and PM7 Geometries of the T-Shaped Indole···Benzene<br>Dimer from the S22 Data Set . . . . . | S36 |
| S5 | Reference, OM2, OM3, $OMx-Dn$ , and PM7 Geometries of the Formic Acid<br>Dimer from the S22 Data Set . . . . .     | S37 |

# 1 Tables: Numerical Results for Individual Molecules and Properties

Table S1: Benchmark Results for the CHNO Data Set. Heats of Formation (kcal/mol)

| Molecule                 | Ref.               | MNDO  | AM1   | PM3   | PM6   | PM7   | OM1   | OM2   |       | OM3   |       | D3T   | D3T   | OM3   | OM3   |       | D3T   |
|--------------------------|--------------------|-------|-------|-------|-------|-------|-------|-------|-------|-------|-------|-------|-------|-------|-------|-------|-------|
|                          |                    |       |       |       |       |       |       | D2    | D3    | D2    | D3    |       |       |       | D2    | D3    |       |
| Hydrogen                 | 0.0 <sup>a</sup>   | 0.7   | -5.2  | -13.4 | -25.7 | -32.0 | 2.6   | -3.4  | -3.5  | -0.0  | -0.0  | -3.5  | -0.0  | -0.0  | -0.0  | -0.1  | -0.1  |
| Methane                  | -17.9 <sup>b</sup> | -11.9 | -8.8  | -13.0 | -12.3 | -14.4 | -13.8 | -19.2 | -19.8 | -18.0 | -18.0 | -19.9 | -18.0 | -18.4 | -18.4 | -19.1 | -19.1 |
| Ethane                   | -20.0 <sup>b</sup> | -19.7 | -17.4 | -18.1 | -15.8 | -18.2 | -20.3 | -21.2 | -22.8 | -20.8 | -20.8 | -22.9 | -20.8 | -21.9 | -23.6 | -23.6 | -23.6 |
| Ethylene                 | 12.5 <sup>b</sup>  | 15.4  | 16.5  | 16.6  | 15.7  | 13.9  | 11.9  | 12.9  | 12.0  | 11.7  | 13.9  | 11.7  | 13.4  | 13.4  | 12.0  | 12.0  | 12.0  |
| Acetylene                | 54.5 <sup>b</sup>  | 57.9  | 54.8  | 50.7  | 56.7  | 57.1  | 53.6  | 54.2  | 53.9  | 54.7  | 53.6  | 53.6  | 54.7  | 54.6  | 53.7  | 53.7  | 53.7  |
| Propane                  | -25.0 <sup>b</sup> | -24.9 | -24.3 | -23.6 | -21.0 | -23.1 | -25.2 | -25.5 | -28.7 | -25.4 | -25.4 | -28.7 | -25.4 | -27.9 | -30.4 | -30.4 | -30.4 |
| Propene ecl              | 4.8 <sup>b</sup>   | 5.0   | 6.6   | 6.4   | 5.6   | 4.2   | 4.4   | 4.7   | 2.6   | 5.0   | 5.0   | 2.3   | 3.5   | 3.5   | 1.1   | 1.1   | 1.1   |
| Propyne                  | 44.2 <sup>b</sup>  | 41.4  | 43.4  | 40.2  | 45.4  | 46.0  | 45.0  | 44.5  | 43.3  | 44.1  | 42.9  | 42.9  | 43.5  | 43.5  | 41.5  | 41.5  | 41.5  |
| Allene                   | 45.5 <sup>b</sup>  | 43.9  | 46.1  | 47.1  | 37.5  | 36.9  | 45.4  | 45.9  | 44.7  | 45.5  | 44.3  | 44.3  | 45.5  | 44.9  | 42.9  | 42.9  | 42.9  |
| n-Butane                 | -30.0 <sup>b</sup> | -29.7 | -31.1 | -29.1 | -26.0 | -28.2 | -30.4 | -30.1 | -34.9 | -30.3 | -34.8 | -34.8 | -30.3 | -34.1 | -37.5 | -37.5 | -37.5 |
| Isobutane                | -32.1 <sup>b</sup> | -26.8 | -29.4 | -29.5 | -27.5 | -28.9 | -28.3 | -31.8 | -37.0 | -31.3 | -36.7 | -36.7 | -31.3 | -35.5 | -38.8 | -38.8 | -38.8 |
| But-1-ene H-ecl          | 0.0 <sup>b</sup>   | -0.2  | 0.2   | 1.4   | 1.2   | -0.4  | -0.7  | 0.1   | -3.6  | 0.3   | -3.8  | -3.8  | 0.3   | -2.4  | -5.7  | -5.7  | -5.7  |
| trans-2-Butene           | -2.7 <sup>b</sup>  | -5.1  | -3.3  | -3.8  | -3.5  | -5.1  | -3.1  | -3.8  | -7.2  | -4.0  | -7.5  | -7.5  | -4.0  | -6.4  | -9.8  | -9.8  | -9.8  |
| cis-2-Butene             | -1.7 <sup>b</sup>  | -3.9  | -2.2  | -3.6  | -2.5  | -3.9  | -1.1  | -1.9  | -5.5  | -2.2  | -5.8  | -5.8  | -2.2  | -4.8  | -8.3  | -8.3  | -8.3  |
| Isobutene                | -4.0 <sup>b</sup>  | -2.0  | -1.2  | -3.3  | -5.1  | -5.6  | -0.4  | -4.3  | -8.0  | -3.9  | -8.2  | -8.2  | -3.9  | -6.7  | -10.1 | -10.1 | -10.1 |
| 1,2-Butadiene            | 38.8 <sup>b</sup>  | 33.5  | 37.1  | 38.0  | 30.1  | 29.0  | 38.4  | 38.1  | 35.8  | 37.6  | 35.2  | 35.2  | 37.6  | 36.1  | 33.0  | 33.0  | 33.0  |
| 1,3-s-tr-Butadiene       | 26.3 <sup>b</sup>  | 29.0  | 29.9  | 31.0  | 28.5  | 27.2  | 28.2  | 29.4  | 26.8  | 30.3  | 26.3  | 26.3  | 30.3  | 28.6  | 25.5  | 25.5  | 25.5  |
| 1-Butyne                 | 39.5 <sup>b</sup>  | 36.1  | 37.5  | 35.7  | 41.2  | 41.7  | 39.9  | 39.5  | 36.8  | 39.2  | 36.5  | 36.5  | 39.2  | 37.5  | 34.6  | 34.6  | 34.6  |
| 2-Butyne                 | 34.8 <sup>b</sup>  | 24.9  | 32.0  | 29.8  | 35.1  | 35.3  | 36.5  | 35.1  | 33.0  | 33.8  | 32.4  | 32.4  | 33.8  | 32.6  | 29.6  | 29.6  | 29.6  |
| Vinylacetylene           | 73.0 <sup>c</sup>  | 65.6  | 67.9  | 66.4  | 69.1  | 69.7  | 70.6  | 71.2  | 69.5  | 71.2  | 69.0  | 69.0  | 71.2  | 70.3  | 67.6  | 67.6  | 67.6  |
| Butatriene               | 83.0 <sup>c</sup>  | 71.3  | 76.1  | 78.6  | 76.8  | 76.0  | 81.6  | 81.9  | 80.4  | 80.7  | 79.8  | 79.8  | 80.7  | 79.9  | 77.3  | 77.3  | 77.3  |
| n-Pentane                | -35.1 <sup>b</sup> | -34.4 | -38.0 | -34.5 | -31.0 | -33.3 | -35.5 | -34.7 | -41.1 | -40.8 | -40.8 | -40.8 | -35.2 | -40.3 | -44.6 | -44.6 | -44.6 |
| Neopentane               | -40.2 <sup>b</sup> | -24.6 | -32.8 | -35.8 | -35.0 | -35.5 | -29.3 | -39.6 | -47.2 | -46.5 | -46.4 | -46.4 | -37.6 | -44.1 | -48.1 | -48.1 | -48.1 |
| n-Hexane                 | -39.9 <sup>b</sup> | -39.1 | -44.8 | -39.9 | -36.0 | -38.4 | -40.7 | -39.2 | -47.3 | -46.9 | -46.9 | -46.9 | -40.0 | -46.5 | -51.6 | -51.6 | -51.6 |
| tr-1,3-Pentadiene        | 18.2 <sup>b</sup>  | 18.8  | 19.8  | 20.7  | 18.6  | 17.3  | 20.2  | 20.5  | 16.6  | 16.1  | 16.1  | 16.1  | 20.9  | 18.2  | 14.0  | 14.0  | 14.0  |
| cis-1,3-Pentadiene       | 19.5 <sup>b</sup>  | 20.1  | 20.9  | 21.1  | 19.5  | 18.4  | 22.2  | 22.4  | 18.3  | 17.8  | 17.8  | 17.8  | 22.8  | 19.8  | 15.6  | 15.6  | 15.6  |
| 1,4-Pentadiene           | 25.2 <sup>b</sup>  | 26.0  | 25.3  | 27.2  | 23.7  | 22.8  | 24.4  | 26.9  | 22.8  | 22.4  | 22.4  | 22.4  | 26.8  | 23.9  | 19.7  | 19.7  | 19.7  |
| Cyclopropane             | 12.7 <sup>b</sup>  | 11.2  | 17.8  | 16.3  | 11.2  | 12.0  | 7.2   | 9.9   | 7.6   | 7.6   | 7.6   | 7.6   | 10.1  | 8.7   | 6.3   | 6.3   | 6.3   |
| cis-Dimethylcyclopropane | 1.3 <sup>d</sup>   | -2.1  | 4.8   | 1.4   | -2.2  | -0.2  | -0.1  | 0.6   | -5.4  | -5.0  | -5.0  | -5.0  | 0.1   | -4.4  | -8.4  | -8.4  | -8.4  |
| Cyclopropene             | 66.2 <sup>b</sup>  | 68.3  | 74.8  | 68.2  | 60.9  | 63.2  | 62.8  | 67.4  | 65.9  | 65.7  | 65.7  | 65.7  | 65.5  | 64.7  | 62.8  | 62.8  | 62.8  |
| 1-Methylcyclopropene     | 58.2 <sup>b</sup>  | 53.7  | 64.7  | 57.4  | 50.0  | 53.0  | 56.6  | 59.6  | 57.0  | 56.7  | 56.7  | 56.7  | 57.1  | 55.6  | 52.6  | 52.6  | 52.6  |
| 1,2-Dimethylcyclopropene | 46.4 <sup>d</sup>  | 39.2  | 54.6  | 46.7  | 40.0  | 43.2  | 50.5  | 51.8  | 48.1  | 47.7  | 47.7  | 47.7  | 48.9  | 46.5  | 42.4  | 42.5  | 42.5  |
| Methylenecyclopropane    | 47.9 <sup>b</sup>  | 37.9  | 47.7  | 44.5  | 35.8  | 38.1  | 42.2  | 45.0  | 42.3  | 42.0  | 42.0  | 42.0  | 43.7  | 42.2  | 39.1  | 39.1  | 39.1  |
| Cyclobutane              | 6.8 <sup>b</sup>   | -11.9 | -1.0  | -3.8  | -3.5  | -2.3  | -1.9  | 3.0   | -1.1  | -1.0  | -1.0  | -1.0  | 2.9   | -0.0  | -3.3  | -3.3  | -3.3  |
| Cyclobutene plan         | 37.5 <sup>b</sup>  | 31.0  | 45.8  | 37.7  | 33.8  | 37.2  | 39.0  | 41.3  | 38.4  | 38.2  | 38.2  | 38.2  | 40.8  | 38.9  | 35.8  | 35.8  | 35.8  |
| 1,2-Dimethylcyclobutene  | 19.8 <sup>d</sup>  | 6.4   | 26.9  | 16.2  | 12.0  | 16.5  | 25.4  | 21.4  | 15.5  | 15.3  | 15.3  | 15.3  | 20.9  | 16.7  | 11.6  | 11.7  | 11.7  |
| Methylenecyclobutane     | 29.0 <sup>b</sup>  | 10.9  | 25.1  | 19.7  | 15.1  | 18.4  | 24.2  | 25.4  | 20.9  | 20.7  | 20.8  | 20.8  | 25.6  | 22.4  | 18.3  | 18.3  | 18.3  |
| Cyclopentane envelope    | -18.3 <sup>b</sup> | -30.5 | -28.8 | -23.9 | -20.1 | -20.0 | -24.8 | -19.7 | -25.8 | -25.5 | -25.5 | -25.5 | -20.8 | -25.2 | -29.8 | -29.8 | -29.8 |
| Cyclopentene             | 8.1 <sup>b</sup>   | -0.3  | 3.0   | 3.0   | 5.1   | 5.4   | 3.5   | 6.8   | 2.1   | 1.9   | 1.9   | 1.9   | 5.7   | 2.7   | -2.0  | -2.0  | -2.0  |
| Cyclopentadiene          | 32.1 <sup>b</sup>  | 32.1  | 37.1  | 31.8  | 32.1  | 32.3  | 33.3  | 33.3  | 29.9  | 29.3  | 29.3  | 29.3  | 32.6  | 30.7  | 26.2  | 26.2  | 26.2  |
| Cyclohexane chair (AMP)  | -29.5 <sup>b</sup> | -34.8 | -38.5 | -31.0 | -27.5 | -27.4 | -31.2 | -27.1 | -35.9 | -35.0 | -35.0 | -35.0 | -28.5 | -35.1 | -40.6 | -40.6 | -40.6 |
| Cyclohexene half-chair   | -1.2 <sup>b</sup>  | -9.9  | -10.1 | -4.9  | -4.0  | -3.4  | -3.7  | 0.4   | -6.6  | -6.5  | -6.4  | -6.4  | -1.1  | -5.9  | -11.7 | -11.7 | -11.7 |

... continued on next page ...

Table S1: . . . continued from previous page . . .

| Molecule              | Ref.               | MNDO  | AMI   | PM3   | PM6   | PM7   | OM1   |       | OM2   |       | OM3   |       | OM3   |       | D3T |
|-----------------------|--------------------|-------|-------|-------|-------|-------|-------|-------|-------|-------|-------|-------|-------|-------|-----|
|                       |                    |       |       |       |       |       | D2    | D3    | D2    | D3    | D2    | D3    | D2    | D3    |     |
| 1,3-Cyclohexadiene    | 25.4 <sup>b</sup>  | 14.5  | 17.5  | 20.4  | 19.3  | 20.2  | 22.3  | 25.9  | 20.4  | 20.0  | 24.8  | 21.4  | 15.6  | 15.6  |     |
| Benzene               | 19.7 <sup>b</sup>  | 21.3  | 22.0  | 23.5  | 24.2  | 23.0  | 17.1  | 18.8  | 14.6  | 13.8  | 18.5  | 16.4  | 10.6  | 10.6  |     |
| Toluene ecl           | 12.0 <sup>b</sup>  | 13.6  | 14.4  | 14.1  | 14.2  | 13.2  | 12.2  | 9.5   | 3.6   | 2.9   | 9.6   | 6.1   | -0.6  | -0.6  |     |
| Ethylbenzene stag     | 7.1 <sup>b</sup>   | 8.8   | 8.7   | 9.5   | 10.2  | 8.5   | 7.1   | 4.8   | -2.9  | -3.5  | 5.0   | -0.0  | -7.7  | -7.7  |     |
| Styrene               | 35.3 <sup>b</sup>  | 37.6  | 38.7  | 39.2  | 37.9  | 36.7  | 36.6  | 34.7  | 28.2  | 27.3  | 35.6  | 31.6  | 24.1  | 24.1  |     |
| Cycloheptatriene      | 43.2 <sup>b</sup>  | 33.8  | 38.3  | 42.5  | 37.4  | 38.6  | 44.0  | 46.7  | 40.1  | 39.7  | 46.1  | 42.0  | 35.3  | 35.4  |     |
| Bicyclobutane         | 51.9 <sup>b</sup>  | 64.1  | 78.1  | 69.2  | 59.5  | 65.5  | 59.0  | 62.0  | 58.9  | 59.0  | 59.9  | 57.9  | 55.2  | 55.2  |     |
| Spirocyclopentane     | 44.3 <sup>b</sup>  | 33.7  | 50.5  | 43.1  | 33.2  | 38.5  | 38.4  | 42.8  | 38.2  | 38.4  | 41.0  | 38.1  | 34.3  | 34.3  |     |
| trans-Bicyclopropyl   | 30.9 <sup>b</sup>  | 28.6  | 39.5  | 36.1  | 25.0  | 29.5  | 26.9  | 30.7  | 24.2  | 24.7  | 30.2  | 25.6  | 21.0  | 21.0  |     |
| Bicyclo[2.1.0]pentane | 37.8 <sup>c</sup>  | 30.2  | 46.1  | 37.8  | 31.5  | 36.9  | 37.3  | 40.1  | 35.1  | 35.4  | 39.0  | 35.5  | 31.6  | 31.6  |     |
| Norbornane            | -13.1 <sup>b</sup> | -10.4 | -14.4 | -13.7 | -10.6 | -9.3  | -10.8 | -12.5 | -22.5 | -21.6 | -12.4 | -19.7 | -26.3 | -26.3 |     |
| Norbornadiene         | 58.8 <sup>b</sup>  | 62.9  | 67.7  | 58.8  | 57.0  | 59.1  | 59.5  | 51.8  | 45.0  | 44.8  | 52.0  | 48.0  | 41.1  | 41.1  |     |
| Bicyclo[2.2.2]octane  | -23.7 <sup>b</sup> | -26.3 | -36.0 | -27.8 | -25.5 | -23.3 | -24.3 | -22.2 | -35.1 | -33.7 | -23.4 | -32.8 | -40.6 | -40.5 |     |
| Naphthalene           | 35.9 <sup>b</sup>  | 38.3  | 40.6  | 40.7  | 40.1  | 39.7  | 40.2  | 34.8  | 26.4  | 25.3  | 35.7  | 31.0  | 21.0  | 21.0  |     |
| Adamantane            | -32.2 <sup>b</sup> | -26.4 | -43.2 | -34.6 | -33.0 | -28.4 | -26.2 | -30.4 | -48.4 | -45.8 | -30.2 | -43.7 | -53.3 | -53.1 |     |
| Cubane                | 148.7 <sup>b</sup> | 99.1  | 151.2 | 113.8 | 106.5 | 125.6 | 147.6 | 144.6 | 136.6 | 137.2 | 146.4 | 141.3 | 134.8 | 134.8 |     |
| Nitrogen              | 0.0 <sup>a</sup>   | 8.3   | 11.2  | 17.6  | 40.6  | 33.0  | -4.4  | 2.8   | 2.8   | 2.6   | 2.6   | 2.6   | 2.2   | 2.2   |     |
| Ammonia               | -11.0 <sup>b</sup> | -6.4  | -7.3  | -3.1  | -3.1  | -4.3  | -3.8  | -5.9  | -6.1  | -6.3  | -11.2 | -11.3 | -12.0 | -12.0 |     |
| Methylamine           | -5.5 <sup>b</sup>  | -7.5  | -7.4  | -5.2  | -2.4  | -3.4  | -4.7  | -4.1  | -5.3  | -5.6  | -5.8  | -6.6  | -8.1  | -8.1  |     |
| Dimethylamine         | -4.4 <sup>b</sup>  | -6.6  | -5.6  | -7.9  | -3.1  | -4.2  | -4.7  | -5.1  | -7.7  | -7.9  | -2.2  | -4.3  | -6.5  | -6.5  |     |
| Trimethylamine        | -5.7 <sup>b</sup>  | -2.8  | -1.7  | -10.9 | -4.4  | -6.2  | -3.5  | -8.0  | -12.4 | -12.4 | -0.1  | -3.8  | -6.7  | -6.7  |     |
| Ethylamine            | -11.3 <sup>b</sup> | -13.2 | -15.1 | -12.5 | -11.2 | -11.3 | -9.3  | -8.9  | -11.5 | -11.7 | -12.1 | -14.1 | -16.5 | -16.5 |     |
| n-Propylamine         | -16.8 <sup>b</sup> | -18.2 | -22.1 | -17.9 | -15.7 | -16.2 | -14.6 | -13.5 | -17.8 | -17.8 | -16.9 | -20.3 | -23.5 | -23.5 |     |
| Isopropylamine        | -20.0 <sup>b</sup> | -16.4 | -17.5 | -17.3 | -15.5 | -15.3 | -14.2 | -14.5 | -19.0 | -18.9 | -17.4 | -21.0 | -24.2 | -24.2 |     |
| tert-Butylamine       | -28.9 <sup>b</sup> | -15.5 | -21.3 | -25.2 | -26.1 | -24.2 | -14.7 | -22.3 | -29.1 | -28.7 | -24.6 | -30.4 | -34.3 | -34.3 |     |
| Aziridine             | 30.2 <sup>b</sup>  | 25.1  | 33.1  | 31.6  | 29.6  | 32.3  | 30.6  | 36.3  | 34.5  | 34.3  | 35.4  | 34.3  | 32.2  | 32.3  |     |
| Pyrrrole              | 25.9 <sup>b</sup>  | 32.5  | 39.9  | 27.1  | 25.8  | 26.5  | 37.2  | 33.7  | 31.0  | 30.2  | 32.0  | 30.5  | 26.3  | 26.3  |     |
| Pyridine              | 33.6 <sup>b</sup>  | 28.8  | 32.0  | 30.4  | 33.9  | 31.7  | 33.0  | 30.8  | 27.1  | 26.3  | 29.4  | 27.6  | 22.2  | 22.3  |     |
| Pyridazine (1,2)      | 66.5 <sup>b</sup>  | 43.6  | 55.3  | 56.0  | 55.2  | 53.2  | 58.2  | 48.4  | 45.2  | 44.3  | 51.1  | 49.5  | 44.6  | 44.6  |     |
| Pyrimidine (1,3)      | 46.8 <sup>b</sup>  | 35.0  | 43.9  | 38.0  | 45.1  | 40.2  | 47.3  | 44.5  | 41.4  | 40.4  | 41.9  | 40.4  | 35.4  | 35.4  |     |
| Pyrazine (1,4)        | 46.9 <sup>b</sup>  | 37.8  | 44.2  | 39.3  | 47.6  | 44.3  | 51.7  | 44.9  | 41.9  | 40.9  | 42.0  | 40.4  | 35.5  | 35.5  |     |
| Aniline               | 20.8 <sup>b</sup>  | 21.7  | 20.5  | 21.3  | 21.4  | 21.2  | 25.6  | 25.2  | 19.9  | 19.0  | 22.3  | 19.2  | 12.7  | 12.7  |     |
| Hydrogen cyanide      | 32.3 <sup>e</sup>  | 35.3  | 31.0  | 33.0  | 33.2  | 29.8  | 24.5  | 26.1  | 25.9  | 25.7  | 25.3  | 25.2  | 24.7  | 24.7  |     |
| Acetonitrile          | 18.0 <sup>e</sup>  | 19.2  | 19.3  | 23.3  | 20.5  | 18.2  | 16.5  | 17.5  | 16.5  | 16.2  | 15.3  | 14.8  | 13.2  | 13.2  |     |
| Methylisocyanide      | 39.1 <sup>b</sup>  | 60.3  | 50.4  | 54.7  | 45.5  | 38.9  | 27.8  | 38.3  | 37.3  | 36.9  | 26.7  | 26.1  | 24.4  | 24.4  |     |
| Propionitrile         | 12.3 <sup>b</sup>  | 43.8  | 13.0  | 18.5  | 16.0  | 13.6  | 10.8  | 12.3  | 9.9   | 9.6   | 10.2  | 8.6   | 6.0   | 6.0   |     |
| Acrylonitrile         | 43.2 <sup>b</sup>  | 43.8  | 45.0  | 50.2  | 46.0  | 43.8  | 43.3  | 45.6  | 44.2  | 43.6  | 43.7  | 42.9  | 40.5  | 40.5  |     |
| Fumaritrile           | 81.0 <sup>b</sup>  | 74.7  | 76.0  | 86.0  | 79.7  | 77.6  | 76.4  | 79.7  | 77.6  | 76.9  | 75.2  | 74.0  | 70.8  | 70.8  |     |
| Maleonitrile          | 81.3 <sup>b</sup>  | 75.0  | 76.6  | 86.9  | 80.6  | 78.1  | 78.0  | 81.2  | 78.9  | 78.2  | 76.2  | 75.0  | 71.6  | 71.6  |     |
| Dicyanoacetylene      | 126.5 <sup>b</sup> | 111.4 | 119.8 | 128.1 | 128.2 | 126.6 | 134.8 | 138.0 | 136.8 | 136.1 | 128.3 | 127.8 | 125.3 | 125.3 |     |
| Cyanogen              | 73.3 <sup>b</sup>  | 66.6  | 67.9  | 77.5  | 74.2  | 71.5  | 72.3  | 74.9  | 74.3  | 73.9  | 68.2  | 68.0  | 66.7  | 66.7  |     |
| Benzonitrile          | 51.6 <sup>b</sup>  | 52.0  | 53.4  | 58.5  | 55.3  | 53.5  | 51.1  | 49.7  | 44.7  | 43.7  | 48.0  | 45.3  | 38.6  | 38.6  |     |
| Hydrazine             | 22.8 <sup>e</sup>  | 14.2  | 13.7  | 20.7  | 15.2  | 15.3  | 16.1  | 18.5  | 17.7  | 17.4  | 16.5  | 15.9  | 14.7  | 14.7  |     |
| Methylhydrazine       | 22.6 <sup>b</sup>  | 14.4  | 17.3  | 17.9  | 14.1  | 14.4  | 15.8  | 18.2  | 16.2  | 15.8  | 20.1  | 18.5  | 16.5  | 16.5  |     |

. . . continued on next page . . .

Table S1: . . . continued from previous page . . .

| Molecule               | Ref.                | MNDO   | AMI    | PM3    | PM6    | PM7    | OM1    | OM2    |        | OM3    |        | D3T    |        |
|------------------------|---------------------|--------|--------|--------|--------|--------|--------|--------|--------|--------|--------|--------|--------|
|                        |                     |        |        |        |        |        |        | D2     | D3     | D2     | D3     |        |        |
| 1,1-Dimethylhydrazine  | 20.1 <sup>b</sup>   | 18.3   | 23.7   | 15.1   | 13.3   | 12.8   | 17.5   | 14.8   | 11.1   | 10.8   | 21.4   | 18.2   | 15.4   |
| 1,2-Dimethylhydrazine  | 22.0 <sup>b</sup>   | 15.0   | 21.5   | 15.6   | 14.0   | 13.5   | 16.2   | 17.1   | 13.5   | 13.2   | 22.8   | 19.7   | 16.9   |
| trans-Azodisopropane   | 8.6 <sup>b</sup>    | 1.5    | 16.6   | 5.6    | 8.9    | 6.7    | 4.7    | 4.5    | -4.1   | -4.5   | 5.8    | -1.3   | -7.8   |
| Hydrogen azide         | 70.3 <sup>c</sup>   | 73.1   | 75.9   | 75.3   | 74.1   | 73.3   | 71.2   | 72.6   | 72.2   | 71.8   | 69.2   | 69.0   | 67.9   |
| Oxygen Triplet         | 0.0 <sup>a</sup>    | -15.3  | -27.0  | -4.2   | -16.8  | -8.5   | -7.1   | 2.0    | 2.0    | 1.9    | -2.6   | -2.6   | -2.8   |
| Ozone                  | 34.0 <sup>a</sup>   | 48.5   | 37.8   | 51.1   | 43.5   | 34.5   | 48.4   | 37.9   | 37.7   | 37.5   | 48.7   | 48.7   | 48.1   |
| Water                  | -57.8 <sup>b</sup>  | -60.9  | -59.2  | -53.4  | -54.3  | -57.8  | -56.7  | -56.5  | -56.6  | -56.7  | -58.5  | -58.5  | -58.8  |
| Methanol               | -48.2 <sup>b</sup>  | -57.4  | -57.0  | -51.9  | -48.3  | -48.9  | -51.0  | -49.3  | -50.2  | -50.3  | -49.8  | -50.4  | -51.4  |
| Ethanol                | -56.2 <sup>b</sup>  | -63.0  | -62.7  | -56.9  | -54.9  | -55.9  | -59.5  | -56.9  | -59.0  | -59.1  | -57.2  | -58.8  | -60.8  |
| Propanol               | -61.0 <sup>b</sup>  | -67.7  | -69.5  | -62.2  | -60.1  | -61.1  | -64.9  | -61.9  | -65.6  | -65.6  | -62.2  | -65.1  | -67.9  |
| Isopropanol            | -65.2 <sup>b</sup>  | -65.1  | -69.5  | -65.8  | -67.2  | -67.2  | -63.8  | -66.7  | -70.6  | -70.5  | -67.2  | -70.3  | -73.1  |
| tert-Butanol           | -74.7 <sup>b</sup>  | -64.3  | -71.6  | -71.3  | -75.1  | -74.8  | -68.2  | -76.8  | -82.9  | -82.5  | -75.9  | -80.9  | -84.5  |
| Dimethylether          | -44.0 <sup>b</sup>  | -51.2  | -53.2  | -48.3  | -45.8  | -45.0  | -43.8  | -45.6  | -47.7  | -47.7  | -42.8  | -44.5  | -46.2  |
| Diethylether           | -60.3 <sup>b</sup>  | -62.0  | -64.4  | -57.4  | -58.5  | -58.9  | -61.4  | -61.1  | -65.9  | -65.9  | -58.4  | -62.2  | -65.7  |
| Oxirane                | -12.6 <sup>b</sup>  | -15.5  | -9.0   | -8.1   | -10.1  | -11.3  | -15.7  | -13.3  | -14.6  | -14.8  | -8.8   | -9.7   | -11.2  |
| Furan                  | -8.3 <sup>b</sup>   | -8.6   | 3.0    | -4.0   | -8.3   | -5.7   | -1.8   | -2.9   | -5.2   | -5.9   | -2.7   | -3.8   | -7.4   |
| Phenol                 | -23.0 <sup>b</sup>  | -26.7  | -22.2  | -21.7  | -21.2  | -22.2  | -23.1  | -21.7  | -26.5  | -27.2  | -23.6  | -26.2  | -32.3  |
| Anisole plan           | -16.2 <sup>b</sup>  | -17.7  | -15.8  | -14.6  | -16.9  | -17.2  | -14.0  | -16.0  | -22.4  | -23.0  | -14.1  | -18.1  | -25.0  |
| Hydrogen peroxide      | -32.5 <sup>c</sup>  | -38.2  | -35.3  | -40.8  | -24.0  | -30.2  | -36.4  | -35.3  | -35.6  | -35.8  | -36.9  | -37.0  | -37.6  |
| Dimethylperoxide       | -30.0 <sup>b</sup>  | -28.3  | -25.7  | -34.1  | -22.9  | -27.7  | -27.5  | -33.6  | -35.7  | -36.0  | -29.0  | -30.7  | -32.7  |
| Diethylperoxide        | -46.1 <sup>b</sup>  | -39.1  | -38.4  | -40.0  | -36.5  | -41.6  | -46.8  | -52.6  | -57.8  | -57.8  | -46.0  | -50.0  | -53.8  |
| Diethylperoxide ecl    | -46.1 <sup>b</sup>  | -38.9  | -36.7  | -40.0  | -35.7  | -41.1  | -45.7  | -49.5  | -54.3  | -54.4  | -44.6  | -48.3  | -52.2  |
| Carbon monoxide        | -26.4 <sup>b</sup>  | -5.9   | -5.7   | -19.7  | -13.7  | -18.3  | -30.5  | -20.3  | -20.4  | -20.5  | -21.5  | -21.5  | -21.8  |
| Carbon dioxide         | -94.1 <sup>b</sup>  | -75.1  | -79.8  | -85.0  | -84.8  | -84.5  | -90.1  | -80.5  | -80.7  | -80.9  | -87.7  | -87.7  | -88.4  |
| Carbon suboxide        | -22.0 <sup>c</sup>  | -23.5  | -14.6  | -24.0  | -42.9  | -41.0  | -15.4  | -3.2   | -4.0   | -4.4   | -16.9  | -17.2  | -18.9  |
| Formaldehyde           | -26.0 <sup>b</sup>  | -32.9  | -31.5  | -34.1  | -20.7  | -25.5  | -34.3  | -30.3  | -30.7  | -30.9  | -31.9  | -32.1  | -32.8  |
| Acetaldehyde free      | -39.7 <sup>b</sup>  | -42.3  | -41.6  | -44.2  | -38.2  | -41.1  | -45.2  | -44.2  | -45.5  | -45.8  | -46.5  | -47.3  | -49.1  |
| Propionaldehyde ecl    | -44.4 <sup>b</sup>  | -47.5  | -47.7  | -48.6  | -41.2  | -44.8  | -50.5  | -48.2  | -51.2  | -51.3  | -50.5  | -52.6  | -55.3  |
| Acetone ecl            | -51.9 <sup>b</sup>  | -49.4  | -49.2  | -53.3  | -54.4  | -55.5  | -52.4  | -57.4  | -60.1  | -60.4  | -59.3  | -61.2  | -63.9  |
| Ketene                 | -11.4 <sup>b</sup>  | -6.8   | -5.7   | -9.2   | -18.5  | -18.8  | -9.9   | -5.1   | -5.7   | -6.1   | -11.0  | -11.3  | -12.6  |
| Acrolein free          | -18.0 <sup>c</sup>  | -17.9  | -16.5  | -18.3  | -11.8  | -15.0  | -20.1  | -18.1  | -19.9  | -20.3  | -19.1  | -20.2  | -22.7  |
| Glyoxal free           | -50.7 <sup>b</sup>  | -62.5  | -58.7  | -64.4  | -45.9  | -52.7  | -64.0  | -59.1  | -60.3  | -60.6  | -62.6  | -63.2  | -65.0  |
| Biacetyl               | -78.2 <sup>b</sup>  | -78.8  | -74.9  | -83.4  | -79.0  | -82.9  | -82.6  | -89.2  | -93.1  | -93.5  | -91.6  | -94.3  | -98.2  |
| Biacetyl               | -78.2 <sup>b</sup>  | -75.6  | -74.1  | -81.4  | -77.8  | -82.1  | -81.6  | -88.8  | -92.7  | -93.0  | -90.7  | -93.4  | -97.3  |
| Acetylacetone          | -91.0 <sup>b</sup>  | -84.3  | -85.6  | -91.6  | -94.8  | -96.0  | -91.0  | -99.2  | -105.0 | -105.2 | -101.8 | -106.2 | -111.0 |
| p-Quinone              | -29.4 <sup>b</sup>  | -32.9  | -25.1  | -31.5  | -27.7  | -28.4  | -26.1  | -32.5  | -37.2  | -37.9  | -32.9  | -35.3  | -41.3  |
| Benzaldehyde           | -8.8 <sup>b</sup>   | -9.9   | -8.9   | -10.6  | -3.0   | -6.1   | -14.0  | -14.5  | -20.1  | -20.9  | -15.6  | -18.7  | -25.6  |
| Formic acid (Z)        | -90.5 <sup>b</sup>  | -92.6  | -97.4  | -94.4  | -87.9  | -89.5  | -91.7  | -86.9  | -87.5  | -87.8  | -88.2  | -88.6  | -89.7  |
| Acetic acid stag (Z)   | -103.4 <sup>b</sup> | -101.1 | -103.0 | -102.0 | -101.1 | -102.2 | -101.3 | -100.9 | -102.7 | -103.0 | -102.7 | -103.8 | -105.9 |
| Propionic acid C-ecl   | -108.4 <sup>b</sup> | -105.6 | -109.0 | -106.3 | -105.2 | -106.7 | -107.0 | -106.3 | -109.7 | -109.8 | -107.5 | -109.8 | -112.9 |
| Oxalic acid 4-ring     | -173.0 <sup>b</sup> | -175.1 | -172.4 | -174.0 | -159.6 | -164.5 | -169.5 | -165.0 | -166.9 | -167.3 | -166.4 | -167.5 | -170.2 |
| Benzoic acid           | -70.3 <sup>b</sup>  | -67.7  | -68.0  | -66.2  | -64.7  | -66.1  | -69.0  | -71.1  | -77.2  | -78.0  | -71.0  | -74.5  | -81.8  |
| Methyl formiate (Z)    | -85.0 <sup>b</sup>  | -85.5  | -91.0  | -87.0  | -84.4  | -84.0  | -83.5  | -81.4  | -83.3  | -83.5  | -79.4  | -80.6  | -82.6  |
| Methyl acetate ecl (Z) | -98.5 <sup>b</sup>  | -93.7  | -96.4  | -94.1  | -97.3  | -96.7  | -93.1  | -95.6  | -98.6  | -98.8  | -93.8  | -96.0  | -99.0  |

. . . continued on next page . . .

Table S1: . . . continued from previous page . . .

| Molecule              | Ref.                | MNDO   | AMI    | PM3    | PM6    | PM7    | OM2    |        | OM3    |        | OM3    |        |        |        |        |
|-----------------------|---------------------|--------|--------|--------|--------|--------|--------|--------|--------|--------|--------|--------|--------|--------|--------|
|                       |                     |        |        |        |        |        | D2     | D3     | D2     | D3     | D2     | D3     | D2     | D3     |        |
| Acetic anhydride ecd  | -136.8 <sup>b</sup> | -132.6 | -131.7 | -135.0 | -138.8 | -140.3 | -136.7 | -139.5 | -143.4 | -143.9 | -143.9 | -138.8 | -141.4 | -145.7 | -145.7 |
| Maleic anhydride      | -95.2 <sup>b</sup>  | -88.5  | -76.4  | -90.1  | -84.4  | -82.4  | -85.6  | -87.1  | -89.8  | -90.4  | -90.4  | -87.2  | -88.4  | -92.5  | -92.5  |
| Formamide             | -44.0 <sup>c</sup>  | -40.2  | -44.8  | -41.8  | -40.6  | -44.1  | -41.2  | -39.8  | -40.7  | -41.1  | -41.1  | -46.3  | -46.9  | -48.4  | -48.4  |
| Dimethylformamide     | -45.8 <sup>b</sup>  | -37.4  | -36.9  | -44.6  | -40.9  | -43.9  | -43.2  | -43.5  | -47.3  | -47.6  | -47.6  | -41.4  | -44.5  | -47.8  | -47.7  |
| Nitrous oxide         | 19.6 <sup>e</sup>   | 31.0   | 28.5   | 25.4   | 27.9   | 28.0   | 19.7   | 21.2   | 21.0   | 20.8   | 20.8   | 20.7   | 20.7   | 19.9   | 19.9   |
| Dinitrotetroxide free | 2.2 <sup>b</sup>    | 29.9   | 24.9   | 8.3    | 10.5   | 7.0    | 8.6    | 13.2   | 12.0   | 11.5   | 11.5   | 9.5    | 8.7    | 6.7    | 6.7    |
| Nitrous acid trans    | -18.3 <sup>e</sup>  | -40.7  | -39.4  | -14.9  | -18.4  | -23.6  | -30.3  | -19.7  | -20.0  | -20.3  | -20.3  | -26.8  | -26.9  | -27.8  | -27.8  |
| Nitric acid           | -32.1 <sup>e</sup>  | -17.5  | -37.5  | -38.0  | -37.1  | -34.3  | -28.2  | -33.6  | -34.3  | -34.6  | -34.6  | -33.4  | -33.7  | -35.1  | -35.1  |
| Methylnitrite         | -15.9 <sup>b</sup>  | -36.7  | -31.8  | -9.1   | -16.5  | -19.2  | -24.4  | -16.8  | -18.0  | -18.4  | -18.4  | -20.0  | -20.9  | -22.6  | -22.6  |
| Nitromethane          | -17.8 <sup>b</sup>  | 3.3    | -9.9   | -15.9  | -16.3  | -17.2  | -6.9   | -17.3  | -18.8  | -19.1  | -19.1  | -15.7  | -16.7  | -18.5  | -18.5  |

a G.Pilcher and H.A.Skinner, in "The Chemistry of the Metal-Carbon Bond", edited by F.R.Hartley and S.Patai, Wiley, New York, 1982, pp. 43-90. b J.B.Pedley, R.D.Naylor, and S.P.Kirby, "Thermochemical Data of Organic Compounds", 2nd ed., Chapman and Hall, London, 1986. c S.G.Lias, J.E.Bartmess, J.F.Liebman, J.L.Holmes, R.D.Levin, and W.G.Mallard, "Gas Phase Ion and Neutral Thermochemistry", J.Phys.Chem.Ref.Data 17, Suppl. 1 (1988). d R.B. Turner, P. Goebel, B.J. Mallon, W. von E. Doering, J.F. Coburn Jr., and M. Pomerantz, J.Am.Chem.Soc. 90, 4315 (1968). See c in Table II, DT paper. e M.W.Chase, C.A.Davies, J.R.Downey, D.R.Fruip, R.A.McDonald, and A.N.Syverud, "JANAF Thermochemical Tables", 3rd edition, J.Phys.Chem.Ref.Data 14, Suppl.1 (1985).



Table S2: Benchmark Results for the CHNO Data Set. Ionization Potentials (eV)

| Molecule           | Ref.               | MNDO  | AMI   | PM3   | PM6   | PM7   | OM1   | OM2   |       | OM3   |       | D3T   |
|--------------------|--------------------|-------|-------|-------|-------|-------|-------|-------|-------|-------|-------|-------|
|                    |                    |       |       |       |       |       |       | D2    | D3    | D2    | D3    |       |
| Hydrogen           | 15.98 <sup>a</sup> | 15.75 | 14.92 | 16.11 | 15.04 | 15.03 | 15.96 | 15.68 | 15.68 | 15.65 | 15.65 | 15.65 |
| Methane            | 14.00 <sup>a</sup> | 13.87 | 13.31 | 13.64 | 13.68 | 13.73 | 14.28 | 13.64 | 13.64 | 14.17 | 14.16 | 14.17 |
| Ethane             | 12.10 <sup>b</sup> | 12.70 | 11.77 | 11.98 | 11.92 | 11.97 | 12.44 | 11.92 | 11.92 | 12.30 | 12.30 | 12.30 |
| Ethylene           | 10.51 <sup>a</sup> | 10.17 | 10.55 | 10.64 | 10.68 | 10.75 | 10.79 | 10.74 | 10.74 | 11.05 | 11.05 | 11.05 |
| Acetylene          | 11.40 <sup>a</sup> | 11.01 | 11.50 | 11.61 | 11.59 | 11.62 | 11.49 | 11.55 | 11.55 | 11.79 | 11.79 | 11.79 |
| Propane            | 11.50 <sup>a</sup> | 12.34 | 11.32 | 11.51 | 11.34 | 11.39 | 11.84 | 11.39 | 11.39 | 11.69 | 11.70 | 11.69 |
| Propene ecl        | 9.88 <sup>b</sup>  | 9.96  | 9.99  | 10.10 | 10.04 | 10.12 | 10.08 | 9.99  | 9.99  | 10.28 | 10.29 | 10.29 |
| Propyne            | 10.37 <sup>a</sup> | 10.72 | 10.74 | 10.89 | 10.73 | 10.76 | 10.66 | 10.64 | 10.64 | 10.88 | 10.88 | 10.88 |
| Allene             | 10.07 <sup>c</sup> | 10.02 | 10.14 | 10.18 | 10.37 | 10.40 | 10.19 | 10.16 | 10.16 | 10.44 | 10.44 | 10.45 |
| Isobutane          | 11.40 <sup>a</sup> | 12.12 | 11.29 | 11.59 | 11.21 | 11.28 | 11.54 | 11.06 | 11.07 | 11.41 | 11.41 | 11.41 |
| 1,3-s-tr-Butadiene | 9.08 <sup>a</sup>  | 9.14  | 9.33  | 9.47  | 9.58  | 9.61  | 9.29  | 9.32  | 9.32  | 9.61  | 9.61  | 9.61  |
| Diacetylene        | 10.17 <sup>a</sup> | 9.99  | 10.37 | 10.47 | 10.58 | 10.53 | 10.06 | 10.30 | 10.30 | 10.47 | 10.46 | 10.47 |
| Butatriene         | 9.15 <sup>d</sup>  | 9.01  | 9.34  | 9.34  | 9.62  | 9.65  | 9.19  | 9.35  | 9.35  | 9.60  | 9.60  | 9.60  |
| Neopentane         | 11.30 <sup>a</sup> | 12.12 | 11.53 | 12.06 | 11.34 | 11.38 | 11.30 | 10.82 | 10.82 | 11.31 | 11.31 | 11.31 |
| Cyclopropane       | 11.00 <sup>b</sup> | 11.43 | 11.48 | 11.78 | 11.42 | 11.59 | 11.61 | 10.88 | 10.88 | 11.47 | 11.46 | 11.47 |
| Cyclopropene       | 9.86 <sup>a</sup>  | 9.88  | 9.82  | 9.88  | 10.08 | 10.16 | 9.97  | 9.84  | 9.84  | 10.13 | 10.13 | 10.13 |
| Cyclobutane        | 11.00 <sup>c</sup> | 11.81 | 10.99 | 11.02 | 11.02 | 11.07 | 11.06 | 10.38 | 10.38 | 10.98 | 10.97 | 10.98 |
| Cyclobutene plan   | 9.43 <sup>a</sup>  | 9.77  | 9.72  | 9.82  | 9.81  | 9.93  | 9.78  | 9.65  | 9.64  | 9.93  | 9.93  | 9.93  |
| Cyclopentene       | 9.18 <sup>a</sup>  | 9.72  | 9.44  | 9.52  | 9.43  | 9.50  | 9.41  | 9.22  | 9.22  | 9.51  | 9.51  | 9.51  |
| Cyclopentadiene    | 8.57 <sup>a</sup>  | 9.04  | 9.08  | 9.23  | 9.20  | 9.31  | 8.92  | 8.82  | 8.82  | 9.10  | 9.10  | 9.10  |
| Benzene            | 9.24 <sup>a</sup>  | 9.39  | 9.65  | 9.75  | 9.64  | 9.82  | 9.66  | 9.59  | 9.59  | 9.91  | 9.91  | 9.91  |
| Toluene ecl        | 8.82 <sup>b</sup>  | 9.28  | 9.33  | 9.44  | 9.24  | 9.43  | 9.26  | 9.17  | 9.16  | 9.46  | 9.46  | 9.46  |
| Naphthalene        | 8.15 <sup>a</sup>  | 8.57  | 8.71  | 8.84  | 8.88  | 8.95  | 8.48  | 8.51  | 8.51  | 8.79  | 8.79  | 8.79  |
| Nitrogen           | 15.60 <sup>b</sup> | 14.87 | 14.32 | 13.80 | 12.86 | 13.66 | 15.19 | 15.46 | 15.46 | 14.51 | 14.51 | 14.51 |
| Ammonia            | 10.85 <sup>b</sup> | 11.19 | 10.42 | 9.70  | 10.10 | 10.15 | 11.08 | 10.67 | 10.67 | 11.23 | 11.23 | 11.23 |
| Methylamine        | 9.45 <sup>c</sup>  | 10.56 | 9.76  | 9.40  | 9.41  | 9.48  | 10.14 | 9.75  | 9.75  | 10.00 | 10.01 | 10.01 |
| Dimethylamine      | 8.93 <sup>c</sup>  | 10.04 | 9.39  | 9.22  | 8.96  | 9.07  | 9.45  | 9.23  | 9.23  | 9.24  | 9.26  | 9.25  |
| Trimethylamine     | 8.54 <sup>c</sup>  | 9.59  | 9.12  | 9.07  | 8.65  | 8.83  | 8.90  | 8.84  | 8.85  | 8.67  | 8.70  | 8.69  |
| Aziridine          | 9.80 <sup>b</sup>  | 10.68 | 10.31 | 9.92  | 9.97  | 10.16 | 10.39 | 10.13 | 10.13 | 10.39 | 10.39 | 10.39 |
| Pyrrrole           | 8.21 <sup>d</sup>  | 8.56  | 8.66  | 8.93  | 8.90  | 9.02  | 8.40  | 8.46  | 8.46  | 8.65  | 8.65  | 8.65  |
| Pyridine           | 9.67 <sup>e</sup>  | 9.69  | 9.93  | 10.10 | 10.10 | 10.24 | 9.99  | 9.96  | 9.96  | 10.13 | 10.13 | 10.13 |
| Hydrogen cyanide   | 13.60 <sup>b</sup> | 13.41 | 13.68 | 12.60 | 13.13 | 13.80 | 13.56 | 13.91 | 13.91 | 13.94 | 13.94 | 13.94 |
| Acetonitrile       | 12.21 <sup>d</sup> | 12.79 | 12.46 | 12.33 | 12.77 | 12.77 | 12.45 | 12.50 | 12.50 | 12.63 | 12.63 | 12.63 |
| Acrylonitrile      | 10.91 <sup>d</sup> | 10.61 | 10.86 | 10.89 | 11.25 | 11.28 | 10.85 | 10.88 | 10.88 | 11.09 | 11.09 | 11.09 |
| Cyanoacetylene     | 11.60 <sup>c</sup> | 11.35 | 11.65 | 11.58 | 11.99 | 11.95 | 11.37 | 11.58 | 11.58 | 11.67 | 11.67 | 11.67 |
| Cyanogen           | 13.36 <sup>d</sup> | 13.20 | 13.31 | 12.87 | 13.58 | 13.79 | 12.94 | 13.27 | 13.27 | 13.22 | 13.22 | 13.22 |
| Ozone              | 12.75 <sup>c</sup> | 12.70 | 13.10 | 12.69 | 11.53 | 12.64 | 12.13 | 12.85 | 12.85 | 13.27 | 13.27 | 13.27 |
| Water              | 12.62 <sup>b</sup> | 12.19 | 12.46 | 12.32 | 11.91 | 12.12 | 12.29 | 12.91 | 12.91 | 13.12 | 13.12 | 13.12 |
| Methanol           | 10.96 <sup>a</sup> | 11.42 | 11.13 | 11.14 | 10.53 | 10.73 | 11.22 | 11.22 | 11.22 | 11.60 | 11.60 | 11.60 |
| Dimethylether      | 10.04 <sup>a</sup> | 11.04 | 10.61 | 10.69 | 9.76  | 9.95  | 10.67 | 10.51 | 10.51 | 10.94 | 10.94 | 10.94 |
| Oxirane            | 10.57 <sup>a</sup> | 11.49 | 11.33 | 11.34 | 10.27 | 10.55 | 11.40 | 11.31 | 11.31 | 11.79 | 11.79 | 11.79 |
| Furan              | 8.88 <sup>a</sup>  | 9.14  | 9.32  | 9.38  | 9.54  | 9.55  | 9.12  | 9.03  | 9.03  | 9.45  | 9.45  | 9.45  |
| Carbon monoxide    | 14.01 <sup>a</sup> | 13.43 | 13.31 | 13.03 | 12.02 | 12.33 | 13.32 | 13.60 | 13.60 | 13.68 | 13.68 | 13.68 |

... continued on next page ...

Table S2: . . . continued from previous page . . .

| Molecule            | Ref.               | MNDO  | AMI   | PM3   | PM6   | PM7   | OM2   |       |       | OM3   |       |       |       |
|---------------------|--------------------|-------|-------|-------|-------|-------|-------|-------|-------|-------|-------|-------|-------|
|                     |                    |       |       |       |       |       | D2    | D3    | D3T   | D2    | D3    | D3T   |       |
| Carbon dioxide      | 13.78 <sup>a</sup> | 12.79 | 13.21 | 12.73 | 12.99 | 12.76 | 12.67 | 13.27 | 13.27 | 13.27 | 13.57 | 13.57 | 13.57 |
| Formaldehyde        | 10.88 <sup>b</sup> | 11.04 | 10.78 | 10.63 | 10.20 | 10.35 | 10.85 | 11.03 | 11.03 | 11.03 | 11.26 | 11.26 | 11.26 |
| Acetaldehyde free   | 10.21 <sup>a</sup> | 10.88 | 10.72 | 10.71 | 10.24 | 10.30 | 10.51 | 10.62 | 10.62 | 10.62 | 10.94 | 10.94 | 10.94 |
| Acetone ecl         | 9.72 <sup>a</sup>  | 10.76 | 10.67 | 10.77 | 10.26 | 10.24 | 10.18 | 10.31 | 10.31 | 10.31 | 10.67 | 10.67 | 10.67 |
| Ketene              | 9.64 <sup>a</sup>  | 9.29  | 9.60  | 9.46  | 9.86  | 9.89  | 9.39  | 9.75  | 9.74  | 9.75  | 9.97  | 9.97  | 9.97  |
| Acrolein free       | 10.11 <sup>b</sup> | 10.69 | 10.69 | 10.69 | 10.22 | 10.30 | 10.46 | 10.59 | 10.59 | 10.59 | 10.87 | 10.87 | 10.87 |
| trans-Glyoxal       | 10.59 <sup>a</sup> | 10.75 | 10.66 | 10.57 | 10.09 | 10.26 | 10.22 | 10.57 | 10.57 | 10.57 | 10.77 | 10.77 | 10.77 |
| Formic acid (Z)     | 11.51 <sup>a</sup> | 11.74 | 11.82 | 11.56 | 11.58 | 11.53 | 11.52 | 11.72 | 11.72 | 11.72 | 12.12 | 12.12 | 12.12 |
| Methyl formiate (Z) | 11.02 <sup>a</sup> | 11.61 | 11.57 | 11.35 | 11.19 | 11.13 | 11.27 | 11.24 | 11.24 | 11.24 | 11.70 | 11.70 | 11.70 |

a J.W. Robinson (ed.), "Handbook of Spectroscopy", Vol.1, CRC Press, Baton Rouge, 1980. b D.W. Turner, C.Baker, A.D.Baker, and C.R.Brundle, "Molecular Photoelectron Spectroscopy", Wiley-Interscience, London, 1970. c Taken from the experimental data quoted in: M.J.S. Dewar, W.Thiel, J.Am.Chem.Soc. 99, 4907 (1977). d S.G.Lias, J.E.Bartmess, J.F.Liebman, J.L.Holmes, R.D.Levin, and W.G.Mallard, "Gas Phase Ion and Neutral Thermochemistry", J.Phys.Chem.Ref.Data 17, Suppl. 1 (1988). e From experimental data of dubious accuracy quoted in: J.J.P.Stewart, J.Comput.Chem. 10, 221 (1991). Original source: G.Dittmer and U.Niemann, Philips J.Res. 37, 1 (1982).

Table S3: Benchmark Results for the CHNO Data Set. Relative Energies (kcal/mol)

| Molecule              | Ref.              | MNDO  | AM1  | PM3  | PM6  | PM7  | OM1  | OM2  |      | OM3  |      | D3T  |
|-----------------------|-------------------|-------|------|------|------|------|------|------|------|------|------|------|
|                       |                   |       |      |      |      |      |      | D2   | D3   | D2   | D3   |      |
| Isobutane             | -2.1 <sup>a</sup> | 2.9   | 1.8  | -0.5 | -1.5 | -0.7 | 2.0  | -1.7 | -2.0 | -1.9 | -1.0 | -1.3 |
| trans-2-Butene        | -2.7 <sup>a</sup> | -4.8  | -3.5 | -5.2 | -4.6 | -4.6 | -2.5 | -3.9 | -3.6 | -3.7 | -4.3 | -4.1 |
| cis-2-Butene          | -1.7 <sup>a</sup> | -3.6  | -2.4 | -5.0 | -3.7 | -3.4 | -0.5 | -2.0 | -2.0 | -2.0 | -2.5 | -2.6 |
| cis-2-Butene          | 1.0 <sup>a</sup>  | 1.2   | 1.1  | 0.2  | 0.9  | 1.2  | 2.0  | 1.8  | 1.6  | 1.7  | 1.8  | 1.5  |
| Isobutene             | -4.0 <sup>a</sup> | -1.8  | -1.3 | -4.8 | -6.2 | -5.2 | 0.3  | -4.4 | -4.5 | -4.5 | -4.2 | -4.4 |
| 2-Butyne              | -4.7 <sup>a</sup> | -11.2 | -5.5 | -5.9 | -6.0 | -6.3 | -3.3 | -4.4 | -3.8 | -4.0 | -5.4 | -4.9 |
| 2-Methylbutane        | -1.6 <sup>a</sup> | 4.4   | 2.6  | 0.1  | -0.7 | -0.2 | 2.9  | -1.2 | -1.9 | -1.6 | -0.3 | -0.9 |
| Neopentane            | -5.1 <sup>a</sup> | 9.8   | 5.2  | 1.4  | -4.0 | -2.2 | 6.2  | -4.9 | -6.0 | -5.7 | -2.5 | -3.5 |
| cis-1,3-Pentadiene    | 1.3 <sup>a</sup>  | 1.2   | 1.1  | 0.4  | 0.9  | 1.1  | 2.0  | 1.9  | 1.7  | 1.7  | 1.9  | 1.6  |
| Isopropylamine        | -3.2 <sup>a</sup> | 1.8   | 4.6  | 0.5  | 0.2  | 1.0  | 0.4  | -1.0 | -1.2 | -1.1 | -0.6 | -0.7 |
| Methylisocyanide      | 21.1 <sup>a</sup> | 41.1  | 31.1 | 31.4 | 25.0 | 20.7 | 11.3 | 20.8 | 20.8 | 20.7 | 11.4 | 11.2 |
| cis-Dimine            | 5.2 <sup>b</sup>  | 1.8   | 0.9  | 5.1  | 3.8  | 3.2  | 0.5  | -4.6 | -4.6 | -4.6 | 0.7  | 0.6  |
| Oxygen Singlet        | 22.5 <sup>c</sup> | 18.3  | 18.5 | 15.0 | 39.0 | 22.8 | 19.4 | 18.3 | 18.3 | 18.3 | 19.0 | 19.0 |
| Isopropanol           | -4.2 <sup>a</sup> | 2.6   | -0.0 | -3.6 | -7.1 | -6.1 | 1.1  | -4.7 | -5.0 | -4.9 | -5.0 | -5.3 |
| Acetylacetone Enol    | -4.0 <sup>d</sup> | 0.3   | 0.7  | 2.9  | -2.3 | -1.7 | 5.9  | 5.2  | 5.9  | 5.5  | 4.6  | 5.0  |
| Acetylacetone Enol TS | 6.9 <sup>e</sup>  | 35.4  | 21.4 | 27.3 | -1.0 | 0.9  | 11.6 | 5.8  | 6.4  | 6.1  | 4.6  | 5.0  |
| Nitromethane          | -1.9 <sup>a</sup> | 40.0  | 21.9 | -6.8 | 0.2  | 2.0  | 17.5 | -0.6 | -0.8 | -0.7 | 4.3  | 4.1  |

<sup>a</sup> J.B.Pedley, R.D.Naylor, and S.P.Kirby, "Thermochemical Data of Organic Compounds", 2nd ed., Chapman and Hall, London, 1986. <sup>b</sup> J.M.L.Martin and P.R.Taylor, Mol.Phys. 96, 681 (1999). <sup>c</sup> M.W.Chase, C.A.Davies, J.R.Downey, D.R.Frurip, R.A.McDonald, and A.N.Syverud, "JANAF Thermochemical Tables", 3rd edition, J Phys.Chem.Ref.Data 14, Suppl.1 (1985). <sup>d</sup> N.S.Hush, M.K.Livett, J.B.Peel, and G.D.Willett, Austr.J.Chem. 40, 599 (1987). <sup>e</sup> M.A.Rios and J.Rodriguez, J.Mol.Struct.: THEOCHEM 204, 137 (1990).

Table S4: Benchmark Results for the CHNO Data Set. Barriers (kcal/mol)

| Molecule                        | Ref.              | MNDO | AM1  | PM3  | PM6  | PM7  | OM1  | OM2  |      |      | OM3  |      |      | OM3  |      |     |
|---------------------------------|-------------------|------|------|------|------|------|------|------|------|------|------|------|------|------|------|-----|
|                                 |                   |      |      |      |      |      |      | D2   | D3   | D3T  | D2   | D3   | D3T  | D2   | D3   | D3T |
| Ethane ecl                      | 2.9 <sup>a</sup>  | 1.0  | 1.2  | 1.4  | 1.0  | 1.0  | 1.8  | 2.8  | 2.8  | 2.8  | 2.8  | 2.4  | 2.4  | 2.5  | 2.5  |     |
| Ethylene ort                    | 65.0 <sup>b</sup> | 29.7 | 36.8 | 36.1 | 34.2 | 37.5 | 57.4 | 57.4 | 57.4 | 57.4 | 57.4 | 55.9 | 55.9 | 56.0 | 56.0 |     |
| Propene stag                    | 2.0 <sup>b</sup>  | 0.2  | 0.6  | 0.7  | 0.3  | 0.3  | 0.2  | 0.8  | 0.8  | 0.8  | 0.8  | 0.7  | 0.7  | 0.7  | 0.7  |     |
| n-Butane cis-Barrier            | 6.0 <sup>c</sup>  | 3.2  | 3.3  | 4.0  | 3.5  | 3.8  | 4.2  | 5.1  | 4.8  | 4.9  | 4.9  | 5.0  | 4.6  | 4.7  | 4.7  |     |
| But-1-ene C-ecl                 | 0.4 <sup>c</sup>  | 1.3  | 0.7  | 0.9  | 1.0  | 1.1  | 1.1  | 1.4  | 1.1  | 1.2  | 1.2  | 1.2  | 1.0  | 1.0  | 1.0  |     |
| 1,3-s-cis-Butadiene             | 3.8 <sup>b</sup>  | 0.5  | 0.8  | 0.7  | 0.9  | 1.0  | 0.7  | 1.1  | 0.9  | 1.0  | 1.0  | 1.0  | 0.8  | 0.8  | 0.8  |     |
| 1,3-gauche-Butadiene (FREE)     | 2.9 <sup>b</sup>  | 0.3  | 0.8  | 0.7  | 0.6  | 0.6  | 0.6  | 0.9  | 0.7  | 0.8  | 0.8  | 0.8  | 0.7  | 0.6  | 0.6  |     |
| 1,3-Butadiene ort               | 6.0 <sup>b</sup>  | 0.3  | 2.0  | 1.5  | 0.8  | 0.8  | 0.6  | 0.9  | 0.7  | 0.8  | 0.8  | 0.8  | 0.7  | 0.6  | 0.7  |     |
| Cyclobutane plan                | 1.4 <sup>a</sup>  | 0.0  | 0.0  | 0.0  | -0.0 | 0.0  | 0.0  | 0.0  | 0.0  | 0.0  | 0.0  | 0.0  | 0.0  | 0.0  | 0.0  |     |
| Methylenecyclobutane plan       | 0.4 <sup>d</sup>  | 0.0  | 0.0  | 0.0  | -0.0 | -0.0 | 0.0  | 0.0  | 0.0  | 0.0  | 0.0  | 0.0  | 0.0  | 0.0  | 0.0  |     |
| Cyclopentane planar             | 4.8 <sup>c</sup>  | 0.0  | 0.1  | 0.5  | 0.4  | 0.8  | 0.7  | 2.6  | 2.8  | 2.7  | 2.7  | 1.9  | 2.1  | 2.0  | 2.0  |     |
| Cyclopentene plan               | 0.7 <sup>e</sup>  | 0.0  | 0.0  | 0.0  | -0.0 | 0.0  | 0.0  | 0.0  | 0.1  | 0.1  | 0.1  | 0.0  | 0.0  | 0.0  | 0.0  |     |
| Cyclohexane twist (AMP)         | 4.8 <sup>c</sup>  | 2.4  | 3.2  | 4.1  | 3.2  | 3.4  | 3.7  | 5.2  | 5.3  | 5.2  | 5.2  | 5.0  | 5.0  | 5.0  | 5.0  |     |
| Cyclohexene plan                | 13.4 <sup>f</sup> | 2.5  | 5.5  | 6.1  | 5.6  | 7.0  | 7.1  | 11.9 | 12.3 | 12.1 | 12.1 | 9.8  | 10.1 | 10.2 | 10.2 |     |
| Cyclohexadiene plan             | 3.2 <sup>g</sup>  | 0.0  | 0.2  | 0.3  | 0.4  | 0.8  | 0.4  | 2.0  | 2.1  | 2.1  | 2.1  | 1.3  | 1.4  | 1.4  | 1.4  |     |
| Toluene stag                    | 0.1 <sup>c</sup>  | 0.0  | -0.0 | -0.0 | 0.0  | 0.0  | 0.0  | -0.0 | -0.0 | -0.0 | -0.0 | 0.0  | -0.0 | 0.0  | 0.0  |     |
| Styrene plan                    | 0.0 <sup>b</sup>  | 1.4  | 0.0  | 0.0  | 0.3  | 0.5  | 0.4  | 0.2  | 0.2  | 0.2  | 0.2  | 0.1  | 0.1  | 0.1  | 0.1  |     |
| Styrene ort                     | 3.1 <sup>b</sup>  | -1.4 | 1.4  | 1.3  | 0.0  | -0.1 | 0.3  | 0.8  | 1.1  | 0.9  | 0.9  | 0.7  | 1.0  | 0.9  | 0.9  |     |
| Ammonia planar                  | 5.8 <sup>h</sup>  | 11.6 | 4.2  | 10.0 | 5.9  | 3.8  | 13.0 | 3.5  | 3.4  | 3.5  | 3.5  | 6.7  | 6.7  | 6.7  | 6.7  |     |
| Methylamine ecl (TS rot)        | 2.0 <sup>i</sup>  | 1.1  | 1.3  | 1.2  | 0.9  | 1.0  | 1.6  | 2.2  | 2.2  | 2.2  | 2.2  | 2.3  | 2.3  | 2.3  | 2.3  |     |
| Methylamine planar (TS inv)     | 4.8 <sup>h</sup>  | 7.6  | 4.2  | 9.1  | 7.2  | 5.3  | 7.7  | 3.6  | 3.6  | 3.6  | 3.6  | 4.2  | 4.2  | 4.2  | 4.2  |     |
| Dimethylamine planar            | 4.4 <sup>h</sup>  | 4.0  | 4.1  | 8.4  | 8.5  | 7.5  | 4.2  | 3.5  | 3.6  | 3.5  | 3.5  | 2.8  | 2.8  | 2.8  | 2.8  |     |
| Trimethylamine planar (C3h inv) | 6.0 <sup>h</sup>  | 1.7  | 4.6  | 8.4  | 11.7 | 11.5 | 2.2  | 4.2  | 4.5  | 4.3  | 4.3  | 2.6  | 2.8  | 2.7  | 2.7  |     |
| Trimethylamine (C3 inv)         | 6.0 <sup>h</sup>  | 1.7  | 4.6  | 8.4  | 11.7 | 11.5 | 2.2  | 4.2  | 4.5  | 4.3  | 4.3  | 0.0  | 2.8  | 2.7  | 2.7  |     |
| Trimethylamine planar (inv)     | 11.6 <sup>h</sup> | 19.6 | 15.7 | 19.5 | 20.3 | 18.8 | 15.9 | 13.4 | 13.4 | 13.4 | 13.4 | 11.5 | 11.5 | 11.5 | 11.5 |     |
| Aziridine planar (inv)          | 1.5 <sup>b</sup>  | 4.2  | 1.0  | 4.5  | 0.8  | 0.2  | 3.5  | 0.5  | 0.5  | 0.6  | 0.6  | 0.6  | 0.6  | 0.7  | 0.7  |     |
| Aniline planar                  | 2.5 <sup>j</sup>  | 0.0  | 0.0  | 0.0  | -0.0 | -0.0 | -0.9 | 8.0  | 8.1  | 8.0  | 8.0  | 1.8  | 1.8  | 1.8  | 1.8  |     |
| Hydrazine trans                 | 8.3 <sup>j</sup>  | 7.9  | 8.2  | 8.0  | 11.2 | 11.4 | 5.9  | 10.8 | 10.8 | 10.8 | 10.8 | 8.7  | 8.6  | 8.7  | 8.7  |     |
| Hydrazine cis                   | 1.1 <sup>i</sup>  | 0.7  | 1.0  | 0.9  | 0.7  | 0.7  | 1.3  | 1.8  | 1.8  | 1.8  | 1.8  | 1.6  | 1.6  | 1.6  | 1.6  |     |
| Methanol ecl                    | 0.0 <sup>k</sup>  | 0.0  | 0.0  | 0.0  | 0.0  | 0.0  | 0.0  | 0.0  | 0.0  | 0.0  | 0.0  | 0.0  | 0.0  | 0.0  | 0.0  |     |
| Phenol plan                     | 3.5 <sup>b</sup>  | 1.9  | 2.4  | 2.4  | 3.8  | 3.2  | 1.9  | 1.4  | 1.5  | 1.4  | 1.4  | 2.0  | 2.0  | 2.0  | 2.0  |     |
| Phenol ort                      | 3.0 <sup>l</sup>  | -0.5 | 1.6  | 1.1  | 3.1  | 2.5  | 0.5  | 0.1  | 0.2  | 0.1  | 0.1  | 0.5  | 0.5  | 0.5  | 0.5  |     |
| Anisole ort                     | 7.0 <sup>i</sup>  | 6.9  | 7.0  | 7.3  | 8.3  | 7.5  | 9.4  | 8.5  | 8.5  | 8.5  | 8.5  | 10.5 | 10.4 | 10.5 | 10.5 |     |
| Hydrogen peroxide cis           | 1.1 <sup>i</sup>  | -0.0 | 0.1  | -0.0 | 0.0  | -0.0 | 2.1  | 2.5  | 2.5  | 2.5  | 2.5  | 1.1  | 1.1  | 1.1  | 1.1  |     |
| Hydrogen peroxide trans         | 0.0 <sup>o</sup>  | 0.2  | 1.7  | 0.0  | 0.8  | 0.5  | 1.1  | 3.2  | 3.5  | 3.4  | 3.4  | 1.4  | 1.7  | 1.6  | 1.6  |     |
| Diethylperoxide                 | 0.0               | 0.0  | 0.0  | 0.0  | 0.0  | 0.0  | 0.0  | 0.0  | 0.0  | 0.0  | 0.0  | 0.0  | 0.0  | 0.0  | 0.0  |     |
| Acetaldehyde ecl                | 0.0               | 0.2  | 0.4  | 0.6  | 0.2  | 0.2  | 0.0  | 0.2  | 0.2  | 0.2  | 0.2  | 0.3  | 0.3  | 0.3  | 0.3  |     |
| Acetaldehyde stag               | 1.1 <sup>c</sup>  | 0.2  | 0.4  | 0.6  | 0.2  | 0.2  | 0.0  | 0.2  | 0.2  | 0.2  | 0.2  | 0.3  | 0.3  | 0.3  | 0.3  |     |
| Propionaldehyde stag            | 1.5 <sup>c</sup>  | 0.2  | -0.6 | -0.6 | -1.3 | -1.1 | -0.2 | -0.8 | -0.8 | -0.8 | -0.8 | -0.7 | -0.7 | -0.6 | -0.6 |     |
| Acrolein s-trans                | 0.0               | 0.0  | 0.0  | 0.0  | 0.0  | 0.0  | 0.0  | 0.0  | 0.0  | 0.0  | 0.0  | 0.0  | 0.0  | 0.0  | 0.0  |     |
| Acrolein s-cis                  | 1.7 <sup>b</sup>  | -0.4 | 0.2  | 0.4  | 0.2  | -0.0 | -0.7 | 0.0  | -0.0 | -0.0 | -0.0 | -0.2 | -0.1 | -0.2 | -0.2 |     |
| Acrolein ort (TS rot)           | 4.7 <sup>m</sup>  | 0.2  | 1.8  | 1.1  | 1.0  | 0.8  | 1.4  | 2.6  | 2.7  | 2.6  | 2.6  | 2.0  | 2.1  | 2.0  | 2.0  |     |
| trans-Glyoxal                   | 0.0 <sup>k</sup>  | 1.1  | 0.0  | 0.1  | 0.0  | 0.1  | 1.0  | 0.0  | 0.0  | 0.0  | 0.0  | 0.8  | 0.7  | 0.8  | 0.8  |     |
| cis-Glyoxal                     | 4.8 <sup>n</sup>  | 0.5  | 2.5  | 2.1  | 4.4  | 3.6  | 1.6  | 3.8  | 3.8  | 3.8  | 3.8  | 2.9  | 2.9  | 2.9  | 2.9  |     |

... continued on next page ...

Table S4: . . . continued from previous page . . .

| Molecule                  | Ref.              | MNDO | AMI  | PM3  | PM6  | PM7  | OM1  | OM2  |      | OM3  |      | D3T  |
|---------------------------|-------------------|------|------|------|------|------|------|------|------|------|------|------|
|                           |                   |      |      |      |      |      |      | D2   | D3   | D2   | D3   |      |
| Glyoxal ort (TS)          | 5.9 <sup>n</sup>  | -1.1 | 0.0  | -0.1 | -0.0 | -0.1 | -1.0 | 0.0  | 0.0  | -0.8 | -0.7 | -0.8 |
| Biacetyl                  | 0.0 <sup>i</sup>  | 3.2  | 0.8  | 2.0  | 1.2  | 0.8  | 1.0  | 0.5  | 0.4  | 0.9  | 0.9  | 0.9  |
| Benzaldehyde ort          | 4.6 <sup>b</sup>  | -0.4 | 2.7  | 1.6  | 2.2  | 1.9  | 2.3  | 3.6  | 3.8  | 3.3  | 3.4  | 3.3  |
| Formic acid (E)           | 3.9 <sup>o</sup>  | 3.7  | 7.4  | 4.3  | 8.4  | 8.7  | 4.1  | 6.1  | 6.1  | 6.2  | 6.1  | 6.2  |
| Formic acid ort (TS)      | 12.4 <sup>o</sup> | 7.7  | 11.9 | 8.9  | 12.9 | 11.4 | 9.4  | 10.5 | 10.5 | 11.3 | 11.3 | 11.3 |
| Acetic acid stag (E)      | 5.8 <sup>p</sup>  | 4.5  | 5.8  | 2.6  | 5.8  | 6.8  | 6.2  | 5.6  | 5.5  | 5.8  | 5.7  | 5.7  |
| Acetic acid stag ort (TS) | 12.6 <sup>o</sup> | 7.7  | 10.5 | 7.4  | 10.6 | 9.9  | 10.8 | 10.1 | 10.1 | 10.9 | 10.8 | 10.8 |
| Benzoic acid plan         | 0.0 <sup>k</sup>  | 1.9  | 0.0  | 0.0  | 0.0  | 0.0  | 0.0  | 0.0  | 0.0  | 0.0  | 0.0  | 0.0  |
| Benzoic acid ort          | 5.0 <sup>q</sup>  | -1.9 | 2.8  | 0.7  | 2.2  | 2.1  | 2.7  | 4.0  | 4.1  | 3.5  | 3.6  | 3.6  |
| Methyl formiate (E)       | 4.8 <sup>o</sup>  | 2.9  | 5.6  | 1.9  | 7.0  | 7.5  | 2.9  | 4.0  | 4.1  | 4.1  | 4.1  | 4.2  |
| Methyl formiate (Z) ECL   | 1.2 <sup>o</sup>  | 1.0  | 0.6  | 1.0  | -0.0 | 0.4  | 0.8  | -0.0 | 0.1  | 0.1  | 0.3  | 0.2  |
| Methyl acetate ecl (E)    | 8.5 <sup>o</sup>  | 5.2  | 5.3  | 1.2  | 6.0  | 7.3  | 6.6  | 5.1  | 4.7  | 5.9  | 5.4  | 5.6  |
| Formamide plan            | 0.0 <sup>r</sup>  | 0.8  | 0.0  | 1.3  | 0.0  | 0.0  | 0.1  | 0.0  | 0.0  | 0.0  | 0.0  | 0.0  |
| Formamide rot             | 16.0 <sup>s</sup> | 4.5  | 10.1 | 4.8  | 10.5 | 10.3 | 8.3  | 13.7 | 13.7 | 14.9 | 14.9 | 14.9 |
| Formamide rot LP cis      | 18.7 <sup>t</sup> | 7.0  | 15.1 | 8.1  | 17.1 | 17.0 | 10.2 | 16.7 | 16.7 | 17.8 | 17.8 | 17.8 |
| Dinitrotetroxide plan     | 0.0 <sup>u</sup>  | 2.1  | 0.0  | 2.9  | -0.0 | 0.2  | 0.5  | 0.1  | 0.1  | 0.1  | 0.1  | 0.1  |
| Dinitrotetroxide ort      | 2.9 <sup>u</sup>  | -2.1 | 0.2  | -2.9 | 0.0  | -0.1 | -0.5 | -0.1 | -0.1 | -0.1 | -0.1 | -0.1 |

<sup>a</sup> Experimental data cited in: W.J. Hehre, L. Radom, P.v.R. Schleyer, and J.A. Pople, "Ab initio Molecular Orbital Theory", Wiley, New York, 1986. <sup>b</sup> Experimental conformational barriers cited in: M. Head-Gordon and J.A. Pople, *J.Phys.Chem.* 97, 1147 (1993); A.E. Dorigo, D.W. Pratt, and K.N. Houk, *J.Am.Chem.Soc.* 109, 6591 (1987). <sup>c</sup> Experimental data cited in: B. Testa, "Grundlagen der Organischen Stereochemie", VCH, Weinheim, 1983. <sup>d</sup> M.E. Charro, J.C. Lopez, J.L. Alonso, G. Wlodarczyk, and J. Demaison, *J.Mol.Spectrosc.* 162, 67 (1993). <sup>e</sup> W.D. Allen, A.G. Csaszar, and D.A. Horner, *J.Am.Chem.Soc.* 114, 6834 (1992), and literature cited therein. Cyclopentene. <sup>f</sup> V.E. Rivera-Gaines, S.J. Leibowitz, and J. Laane, *J.Am.Chem.Soc.* 113, 9735 (1991). <sup>g</sup> D. Autrey, J. Choo, and J. Laane, *J.Phys.Chem.* A 105, 10230 (2001). <sup>h</sup> A. Raulk, J.D. Andose, W.G. Frick, R. Tang, and K. Mislav, *J.Am.Chem.Soc.* 93, 6507 (1971). Inversions at nitrogen. <sup>i</sup> Taken from the experimental data quoted in: M.J.S. Dewar, W.Thiel, *J.Am.Chem.Soc.* 99, 4907 (1977). <sup>j</sup> V. Dyczmons, *J.Phys.Chem.A* 104, 8263 (2000). <sup>k</sup> J.B. Pedley, R.D. Naylor, and S.P. Kirby, "Thermochemical Data of Organic Compounds", 2nd ed., Chapman and Hall, London, 1986. <sup>l</sup> P.A. Kollman et al., *J.Phys.Chem.* 94, 4483 (1990). Anisole barrier. <sup>m</sup> Experimental data cited in: W.M.F. Fabian, *J.Comput.Chem.* 9, 369 (1988). <sup>n</sup> K.W. Butz, D.J. Krajnovich, and C.S. Parmenter, *J.Chem.Phys.* 93, 1557 (1990). Glyoxal internal rotation. <sup>o</sup> K.B. Wiberg and K.E. Laidig, *J.Am.Chem.Soc.* 109, 5935 (1987). <sup>p</sup> Experimental data cited in: A. St.-Amant, W. D. Cornell, P. A. Kollman, and T.A. Halgren, *J.Comput.Chem.* 16, 1483 (1995). <sup>q</sup> P.I. Nagy, D.A. Smith, G. Alagona and C. Ghio, *J.Phys.Chem.* 98, 486 (1994). <sup>r</sup> S.G. Lias, J.E. Bartmess, J.F. Liebman, J.L. Holmes, R.D. Levin, and W.G. Mallard, "Gas Phase Ion and Neutral Thermochemistry", *J.Phys.Chem.Ref.Data* 17, Suppl. 1 (1988). <sup>s</sup> K.B. Wiberg and P.R. Rablen, *J.Am.Chem.Soc.* 117, 2201 (1995). <sup>t</sup> K.B. Wiberg and C.M. Breneman, *J.Am.Chem.Soc.* 114, 831 (1992). <sup>u</sup> Y. Mo and Q. Zhang, *Int.J.Quant.Chem.* 56, 19 (1995). Computed and cited experimental data on N2O2 and N2O4.

Table S5: Benchmark Results for the FLUOR Data Set. Heats of Formation (kcal/mol)

| Molecule                     | Ref.                | MNDO   | AM1    | PM3    | PM6    | PM7    | OM1    | OM2    |        | OM3    |        | D3T    | OM3    | D3     | D3T    |
|------------------------------|---------------------|--------|--------|--------|--------|--------|--------|--------|--------|--------|--------|--------|--------|--------|--------|
|                              |                     |        |        |        |        |        |        | D2     | D3     | D2     | D3     |        |        |        |        |
| Fluorine                     | 0.0 <sup>a</sup>    | 7.3    | -22.5  | -21.7  | 0.3    | -15.9  | 12.3   | 0.6    | 0.5    | -1.7   | -1.7   | -1.8   | -1.7   | -1.8   | -1.8   |
| Hydrogen fluoride            | -65.1 <sup>a</sup>  | -59.7  | -74.3  | -62.7  | -63.6  | -61.9  | -69.7  | -63.3  | -63.4  | -63.3  | -63.3  | -63.4  | -64.9  | -65.0  | -65.0  |
| Methylfluoride               | -56.0 <sup>a</sup>  | -60.9  | -61.0  | -53.8  | -53.6  | -49.4  | -54.8  | -60.4  | -61.1  | -61.0  | -61.0  | -61.1  | -57.3  | -58.5  | -58.5  |
| Difluoromethane              | -108.1 <sup>b</sup> | -111.8 | -116.1 | -103.8 | -104.7 | -97.8  | -104.7 | -110.9 | -111.6 | -111.6 | -111.6 | -111.6 | -106.6 | -107.8 | -107.8 |
| Trifluoromethane             | -166.2 <sup>b</sup> | -163.8 | -172.5 | -162.0 | -162.7 | -157.1 | -160.6 | -166.8 | -167.6 | -167.6 | -167.6 | -167.6 | -162.0 | -163.3 | -163.3 |
| Tetrafluoromethane           | -223.1 <sup>b</sup> | -214.2 | -225.7 | -225.1 | -219.1 | -215.9 | -217.2 | -220.5 | -221.4 | -221.4 | -221.4 | -221.4 | -215.8 | -217.3 | -217.3 |
| Fluoroethane                 | -63.0 <sup>c</sup>  | -65.1  | -66.3  | -60.2  | -61.9  | -59.3  | -65.6  | -67.5  | -69.4  | -69.4  | -69.4  | -69.4  | -65.8  | -68.8  | -68.8  |
| 1,1-Difluoroethane           | -118.8 <sup>b</sup> | -113.4 | -118.6 | -111.9 | -117.1 | -113.3 | -119.0 | -121.8 | -123.6 | -123.6 | -123.6 | -123.6 | -119.4 | -122.4 | -122.4 |
| 1,1,1-Trifluoroethane        | -178.0 <sup>b</sup> | -164.4 | -172.6 | -172.3 | -176.6 | -174.8 | -176.9 | -178.4 | -180.4 | -180.4 | -180.4 | -180.4 | -176.3 | -179.4 | -179.4 |
| Hexafluoroethane             | -321.3 <sup>b</sup> | -299.6 | -313.2 | -317.8 | -314.4 | -311.9 | -316.2 | -317.5 | -320.4 | -320.4 | -319.7 | -319.7 | -310.5 | -314.0 | -314.0 |
| i-Propylfluoride             | -70.1 <sup>b</sup>  | -66.6  | -69.8  | -66.8  | -71.3  | -69.7  | -74.5  | -76.2  | -79.6  | -79.6  | -79.4  | -79.4  | -75.1  | -80.2  | -80.2  |
| Octafluorocyclobutane        | -368.7 <sup>b</sup> | -363.7 | -367.2 | -379.2 | -380.3 | -375.3 | -379.9 | -379.9 | -384.6 | -384.6 | -384.6 | -384.6 | -372.9 | -380.1 | -380.1 |
| Fluoroethene                 | -33.2 <sup>b</sup>  | -34.5  | -34.0  | -28.6  | -33.3  | -32.3  | -33.1  | -32.3  | -33.5  | -33.5  | -33.5  | -33.5  | -32.2  | -34.1  | -34.1  |
| 1,2-Difluoroethene cis       | -71.0 <sup>c</sup>  | -83.6  | -82.7  | -73.0  | -76.6  | -73.6  | -73.0  | -72.2  | -73.5  | -73.5  | -73.5  | -73.5  | -71.7  | -73.7  | -73.7  |
| 1,2-Difluoroethene trans     | -70.0 <sup>c</sup>  | -83.1  | -82.7  | -71.5  | -77.5  | -73.7  | -74.7  | -74.3  | -75.6  | -75.6  | -75.6  | -75.6  | -72.7  | -74.8  | -74.8  |
| 1,1-Difluoroethene           | -80.1 <sup>b</sup>  | -84.1  | -84.3  | -79.6  | -85.1  | -84.4  | -80.3  | -78.4  | -79.5  | -79.5  | -79.6  | -79.6  | -79.9  | -81.9  | -81.9  |
| Trifluoroethene              | -117.2 <sup>b</sup> | -131.1 | -130.6 | -121.5 | -125.0 | -122.0 | -117.6 | -116.4 | -117.7 | -117.7 | -117.7 | -117.7 | -115.9 | -118.0 | -118.0 |
| Tetrafluoroethene            | -157.5 <sup>b</sup> | -175.7 | -175.1 | -168.2 | -169.1 | -166.5 | -157.6 | -156.3 | -157.7 | -157.7 | -157.7 | -157.7 | -155.9 | -158.2 | -158.2 |
| Fluorobenzene                | -27.7 <sup>b</sup>  | -25.2  | -23.3  | -20.2  | -24.3  | -24.6  | -28.8  | -27.3  | -31.8  | -31.8  | -32.3  | -32.3  | -28.0  | -35.9  | -35.9  |
| 1,2-Difluorobenzene          | -70.2 <sup>b</sup>  | -70.6  | -66.4  | -63.1  | -68.3  | -68.5  | -70.5  | -69.1  | -73.8  | -73.8  | -74.1  | -74.1  | -69.9  | -77.9  | -77.9  |
| 1,3-Difluorobenzene          | -73.9 <sup>b</sup>  | -70.9  | -67.9  | -63.3  | -72.5  | -71.5  | -74.2  | -72.9  | -77.6  | -77.6  | -78.0  | -78.0  | -74.0  | -82.0  | -82.0  |
| 1,4-Difluorobenzene          | -73.3 <sup>b</sup>  | -71.0  | -68.0  | -63.3  | -71.3  | -70.9  | -73.9  | -72.6  | -77.2  | -77.2  | -77.6  | -77.6  | -73.5  | -81.5  | -81.5  |
| Pentafluorobenzene           | -192.8 <sup>b</sup> | -201.7 | -192.0 | -188.6 | -197.9 | -196.9 | -192.6 | -191.8 | -197.3 | -197.3 | -197.1 | -197.1 | -192.7 | -201.0 | -201.0 |
| Hexafluorobenzene            | -228.3 <sup>b</sup> | -243.4 | -231.2 | -229.3 | -237.1 | -236.2 | -229.0 | -228.4 | -234.2 | -234.2 | -233.7 | -233.7 | -228.8 | -237.2 | -237.2 |
| Fluoroacetylene              | 25.1 <sup>d</sup>   | 15.7   | 15.2   | 18.1   | 21.4   | 23.5   | 26.7   | 26.9   | 26.4   | 26.4   | 26.2   | 26.2   | 23.9   | 22.9   | 22.9   |
| Difluoroacetylene            | 1.4 <sup>d</sup>    | -21.0  | -19.6  | -11.6  | -9.2   | -5.7   | 4.0    | 4.4    | 3.9    | 3.9    | 3.8    | 3.8    | -2.6   | -3.7   | -3.7   |
| Hypofluorous acid            | -23.5 <sup>a</sup>  | -18.6  | -22.6  | -29.2  | -17.3  | -17.3  | -15.8  | -19.6  | -19.7  | -19.7  | -19.8  | -19.8  | -20.3  | -20.7  | -20.7  |
| Fluoroethanol gauche         | -100.0 <sup>c</sup> | -107.8 | -111.5 | -99.8  | -99.4  | -96.2  | -101.0 | -100.7 | -103.2 | -103.2 | -103.1 | -103.1 | -100.1 | -103.8 | -103.8 |
| 1,1,1-Trifluoroethanol       | -212.3 <sup>a</sup> | -207.2 | -214.1 | -209.1 | -206.8 | -207.3 | -212.4 | -209.2 | -211.9 | -211.9 | -211.6 | -211.6 | -206.4 | -210.2 | -210.2 |
| Trifluoromethylhypofluorite  | -182.8 <sup>a</sup> | -163.3 | -177.7 | -187.3 | -180.8 | -177.4 | -167.0 | -174.0 | -175.5 | -175.5 | -175.3 | -175.3 | -166.3 | -168.4 | -168.4 |
| Difluorine monoxide          | 5.9 <sup>a</sup>    | 18.2   | 10.5   | -4.8   | 4.3    | 3.5    | 16.2   | 5.3    | 5.1    | 5.1    | 5.1    | 5.1    | 7.2    | 6.7    | 6.7    |
| Formyl fluoride              | -90.0 <sup>a</sup>  | -88.8  | -92.9  | -88.8  | -84.4  | -84.5  | -87.3  | -86.3  | -86.8  | -86.8  | -86.9  | -86.9  | -88.2  | -89.2  | -89.2  |
| Acetyl fluoride              | -105.7 <sup>b</sup> | -96.5  | -98.8  | -98.7  | -100.7 | -100.9 | -99.8  | -100.0 | -101.5 | -101.5 | -101.6 | -101.6 | -103.0 | -105.7 | -105.7 |
| Carbonyl fluoride            | -145.9 <sup>e</sup> | -138.6 | -146.3 | -141.6 | -139.7 | -138.8 | -137.1 | -136.5 | -137.0 | -137.0 | -137.1 | -137.1 | -138.7 | -139.7 | -139.7 |
| Trifluoroacetic acid trans   | -246.5 <sup>b</sup> | -238.1 | -242.7 | -244.0 | -239.1 | -241.3 | -244.7 | -242.3 | -244.6 | -244.6 | -244.6 | -244.6 | -239.7 | -243.3 | -243.3 |
| p-Fluorobenzoic acid         | -118.2 <sup>b</sup> | -111.8 | -113.0 | -109.5 | -113.0 | -113.5 | -114.8 | -116.9 | -123.2 | -123.2 | -123.9 | -123.9 | -117.4 | -128.3 | -128.3 |
| Trifluoroamine               | -29.8 <sup>b</sup>  | -34.2  | -40.0  | -24.4  | -29.2  | -28.2  | -36.1  | -30.1  | -30.6  | -30.6  | -30.7  | -30.7  | -35.9  | -36.9  | -36.9  |
| (Z)-Difluorodiazene          | 16.4 <sup>a</sup>   | -2.3   | 20.8   | 28.0   | 26.9   | 23.2   | 4.5    | 13.5   | 13.0   | 13.0   | 12.8   | 12.8   | 11.7   | 10.5   | 10.5   |
| (E)-Difluorodiazene          | 19.4 <sup>a</sup>   | 2.4    | 31.3   | 29.2   | 35.7   | 33.6   | 6.0    | 22.7   | 22.3   | 22.3   | 22.0   | 22.0   | 22.4   | 21.3   | 21.3   |
| Tetrafluoro-hydrazine gauche | -8.0 <sup>c</sup>   | -19.7  | 5.8    | -0.5   | -8.5   | -8.3   | -26.7  | -6.3   | -7.7   | -7.7   | -7.7   | -7.7   | -6.4   | -8.6   | -8.6   |
| Fluorocyanide                | 8.6 <sup>a</sup>    | -2.3   | -4.4   | 6.5    | -0.3   | -0.4   | 2.2    | 1.9    | 1.7    | 1.7    | 1.5    | 1.5    | -1.5   | -2.2   | -2.2   |
| Trifluoroacetonitrile        | -119.0 <sup>b</sup> | -113.2 | -119.5 | -115.0 | -120.9 | -118.4 | -126.7 | -125.5 | -126.9 | -126.9 | -127.0 | -127.0 | -125.1 | -127.5 | -127.5 |

... continued on next page ...

Table S5: . . . continued from previous page . . .

| Molecule             | Ref.               | MNDO  | AM1   | PM3   | PM6   | PM7   | OM1   |       | OM2   |       | OM3   |       | OM3   |       | D3T   |
|----------------------|--------------------|-------|-------|-------|-------|-------|-------|-------|-------|-------|-------|-------|-------|-------|-------|
|                      |                    |       |       |       |       |       | D2    | D3    | D2    | D3    | D2    | D3    | D2    | D3    |       |
| Fluorocarbene        | 34.2 <sup>f</sup>  | 21.5  | 20.9  | 35.3  | 27.3  | 25.3  | 26.1  | 24.9  | 24.7  | 24.6  | 24.4  | 24.4  | 24.4  | 23.9  | 23.9  |
| Difluorocarbene      | -43.8 <sup>g</sup> | -65.2 | -68.0 | -49.1 | -63.0 | -69.6 | -56.0 | -57.8 | -58.0 | -58.1 | -58.1 | -55.7 | -55.8 | -56.3 | -56.3 |
| Nitrosyl fluoride    | -15.7 <sup>a</sup> | -24.8 | -26.5 | -3.3  | -3.0  | -7.8  | -20.9 | -10.4 | -10.5 | -10.7 | -10.7 | -21.6 | -21.6 | -22.2 | -22.2 |
| Nitryl fluoride      | -26.0 <sup>a</sup> | 0.7   | -21.3 | -25.6 | -28.5 | -21.4 | -22.6 | -25.7 | -26.1 | -26.4 | -26.4 | -29.3 | -29.4 | -30.4 | -30.4 |
| Fluorine nitrate     | 2.5 <sup>b</sup>   | 28.0  | 13.7  | -6.1  | -5.2  | -1.3  | 12.4  | 2.6   | 1.8   | 1.5   | 1.5   | 4.3   | 3.9   | 2.5   | 2.5   |
| Nitrosyl trifluoride | -39.0 <sup>a</sup> | 22.8  | -14.6 | -26.6 | -42.2 | -29.9 | -36.3 | -50.0 | -50.8 | -51.0 | -51.0 | -50.7 | -50.9 | -52.3 | -52.3 |

a M.W.Chase, C.A.Davies, J.R.Downey, D.R.Frurip, R.A.McDonald, and A.N.Syverud, "JANAF Thermochemical Tables", 3rd edition, J Phys.Chem.Ref.Data 14, Suppl.1 (1985). b J.B.Pedley, R.D.Naylor, and S.P.Kirby, "Thermochemical Data of Organic Compounds", 2nd ed., Chapman and Hall, London, 1986. c S.G.Lias, J.E.Bartmess, J.F.Liebman, J.L.Holmes, R.D.Levin, and W.G.Mallard, "Gas Phase Ion and Neutral Thermochemistry", J.Phys.Chem.Ref.Data 17, Suppl. 1 (1988). d S.Parthiban, J.M.L.Martin, and J.F.Liebman, Mol.Phys. 100, 453 (2002). e N.L.Haworth, M.H.Smith, G.B.Bacskay, and J.C.Mackie, J.Phys.Chem. A 104, 7600 (2000). f J.C.Poutisma, J.A.Paulino, and R.R.Squires, J.Phys.Chem. A 101, 5327 (1997). g J.Demaision, L.Margules, J.M.L.Martin, and J.E.Boggs, Phys.Chem.Chem.Phys. 4, 3282 (2002).

Table S6: Benchmark Results for the FLUOR Data Set. Ionization Potentials (eV)

| Molecule                      | Ref.               | MNDO  | AM1   | PM3   | PM6   | PM7   | OM1   | OM2   |       | OM3   |       | OM3   | OM3   |       | D3T   |
|-------------------------------|--------------------|-------|-------|-------|-------|-------|-------|-------|-------|-------|-------|-------|-------|-------|-------|
|                               |                    |       |       |       |       |       |       | D2    | D3    | D2    | D3    |       | D2    | D3    |       |
| Fluorine                      | 15.83 <sup>a</sup> | 15.25 | 14.28 | 15.35 | 15.74 | 16.10 | 15.92 | 16.32 | 16.32 | 16.32 | 16.32 | 16.36 | 16.36 | 16.36 | 16.36 |
| Hydrogen fluoride             | 16.03 <sup>a</sup> | 14.82 | 14.09 | 16.14 | 15.82 | 15.80 | 15.87 | 16.45 | 16.45 | 16.45 | 16.45 | 17.03 | 17.03 | 17.03 | 17.03 |
| Methylfluoride                | 13.31 <sup>a</sup> | 13.05 | 12.10 | 12.92 | 13.27 | 13.17 | 13.40 | 13.07 | 13.07 | 13.07 | 13.07 | 13.41 | 13.40 | 13.41 | 13.41 |
| Difluoromethane               | 13.17 <sup>a</sup> | 13.09 | 12.02 | 12.86 | 13.39 | 13.23 | 13.30 | 12.98 | 12.98 | 12.98 | 12.98 | 13.23 | 13.23 | 13.23 | 13.23 |
| Trifluoromethane              | 14.67 <sup>a</sup> | 14.57 | 13.31 | 14.36 | 14.54 | 14.43 | 14.43 | 14.17 | 14.17 | 14.17 | 14.17 | 14.45 | 14.45 | 14.45 | 14.45 |
| Tetrafluoromethane            | 16.23 <sup>a</sup> | 16.81 | 15.32 | 16.79 | 16.04 | 16.09 | 16.48 | 16.27 | 16.27 | 16.27 | 16.27 | 16.89 | 16.89 | 16.89 | 16.89 |
| Fluoroethane                  | 12.43 <sup>a</sup> | 12.61 | 11.58 | 12.07 | 12.16 | 12.11 | 12.46 | 12.01 | 12.02 | 12.01 | 12.01 | 12.28 | 12.29 | 12.28 | 12.28 |
| 1,1-Difluoroethane            | 12.80 <sup>a</sup> | 12.73 | 11.93 | 12.82 | 12.96 | 12.85 | 12.91 | 12.30 | 12.30 | 12.30 | 12.30 | 12.69 | 12.69 | 12.69 | 12.69 |
| 1,1,1-Trifluoroethane         | 13.80 <sup>a</sup> | 14.01 | 13.12 | 14.38 | 14.13 | 14.06 | 13.96 | 13.23 | 13.22 | 13.23 | 13.23 | 13.78 | 13.77 | 13.78 | 13.78 |
| Hexafluoroethane              | 14.60 <sup>a</sup> | 14.50 | 13.23 | 14.48 | 14.37 | 14.26 | 14.24 | 13.67 | 13.66 | 13.67 | 13.67 | 13.92 | 13.90 | 13.91 | 13.91 |
| Fluoroethene                  | 10.58 <sup>a</sup> | 10.17 | 10.24 | 10.60 | 10.81 | 10.84 | 10.66 | 10.59 | 10.59 | 10.59 | 10.59 | 10.85 | 10.85 | 10.85 | 10.85 |
| 1,2-Difluoroethene cis        | 10.43 <sup>a</sup> | 10.18 | 9.99  | 10.54 | 10.79 | 10.80 | 10.46 | 10.38 | 10.38 | 10.38 | 10.38 | 10.56 | 10.56 | 10.56 | 10.56 |
| 1,2-Difluoroethene trans      | 10.38 <sup>a</sup> | 10.19 | 10.01 | 10.54 | 10.83 | 10.84 | 10.52 | 10.43 | 10.43 | 10.43 | 10.43 | 10.61 | 10.61 | 10.61 | 10.61 |
| 1,1,1-Difluoroethene          | 10.72 <sup>a</sup> | 10.45 | 10.33 | 10.76 | 11.04 | 11.07 | 10.71 | 10.62 | 10.62 | 10.62 | 10.62 | 10.84 | 10.84 | 10.84 | 10.84 |
| Trifluoroethene               | 10.53 <sup>a</sup> | 10.46 | 10.09 | 10.68 | 10.95 | 10.98 | 10.51 | 10.40 | 10.40 | 10.40 | 10.40 | 10.53 | 10.53 | 10.53 | 10.53 |
| Tetrafluoroethene             | 10.52 <sup>a</sup> | 10.74 | 10.19 | 10.80 | 11.01 | 11.09 | 10.50 | 10.38 | 10.38 | 10.38 | 10.38 | 10.45 | 10.45 | 10.45 | 10.45 |
| Fluorobenzene                 | 9.19 <sup>a</sup>  | 9.47  | 9.54  | 9.81  | 9.78  | 9.94  | 9.68  | 9.58  | 9.58  | 9.58  | 9.58  | 9.85  | 9.85  | 9.85  | 9.85  |
| 1,2-Difluorobenzene           | 9.68 <sup>a</sup>  | 9.69  | 9.63  | 9.98  | 9.97  | 10.13 | 9.83  | 9.71  | 9.71  | 9.71  | 9.71  | 9.92  | 9.92  | 9.92  | 9.92  |
| 1,3-Difluorobenzene           | 9.68 <sup>a</sup>  | 9.73  | 9.72  | 10.02 | 10.09 | 10.22 | 9.91  | 9.79  | 9.79  | 9.79  | 9.79  | 10.02 | 10.02 | 10.02 | 10.02 |
| 1,4-Difluorobenzene           | 9.15 <sup>a</sup>  | 9.56  | 9.49  | 9.87  | 9.89  | 10.04 | 9.71  | 9.58  | 9.58  | 9.58  | 9.58  | 9.80  | 9.80  | 9.80  | 9.80  |
| Hexafluorobenzene             | 10.12 <sup>a</sup> | 10.77 | 10.37 | 10.85 | 10.88 | 11.04 | 10.69 | 10.50 | 10.50 | 10.50 | 10.50 | 10.60 | 10.60 | 10.60 | 10.60 |
| Fluoroacetylene               | 11.30 <sup>a</sup> | 11.06 | 11.15 | 11.56 | 11.59 | 11.65 | 11.31 | 11.33 | 11.33 | 11.33 | 11.33 | 11.52 | 11.52 | 11.52 | 11.52 |
| Hypofluorous acid             | 13.00 <sup>a</sup> | 12.75 | 12.55 | 12.98 | 11.31 | 11.78 | 12.79 | 13.23 | 13.23 | 13.23 | 13.23 | 13.44 | 13.44 | 13.44 | 13.44 |
| 1,1,1-Trifluoroethanol        | 11.74 <sup>a</sup> | 12.44 | 12.05 | 12.04 | 11.36 | 11.60 | 12.06 | 12.04 | 12.04 | 12.04 | 12.04 | 12.34 | 12.34 | 12.34 | 12.34 |
| Trifluoromethylhypofluorite   | 13.64 <sup>a</sup> | 14.23 | 13.67 | 14.18 | 12.63 | 13.03 | 13.90 | 14.01 | 14.01 | 14.01 | 14.01 | 14.20 | 14.20 | 14.20 | 14.20 |
| Difluorine monoxide           | 13.26 <sup>a</sup> | 13.52 | 12.90 | 13.47 | 11.20 | 11.87 | 13.25 | 13.56 | 13.56 | 13.56 | 13.56 | 13.78 | 13.78 | 13.78 | 13.78 |
| Acetyl fluoride               | 11.80 <sup>a</sup> | 12.21 | 11.99 | 12.06 | 11.69 | 11.68 | 11.79 | 11.86 | 11.86 | 11.86 | 11.86 | 12.30 | 12.29 | 12.30 | 12.30 |
| Carbonyl fluoride             | 13.60 <sup>a</sup> | 13.61 | 13.39 | 13.30 | 12.95 | 13.01 | 13.21 | 13.39 | 13.39 | 13.39 | 13.39 | 13.86 | 13.86 | 13.86 | 13.86 |
| Hexafluoroacetone             | 12.09 <sup>a</sup> | 13.00 | 12.34 | 12.71 | 12.06 | 12.17 | 12.11 | 12.03 | 12.03 | 12.03 | 12.03 | 12.16 | 12.15 | 12.16 | 12.16 |
| Trifluoroamine                | 13.73 <sup>a</sup> | 13.93 | 13.18 | 12.24 | 12.82 | 13.40 | 13.25 | 13.29 | 13.29 | 13.29 | 13.29 | 13.68 | 13.67 | 13.68 | 13.68 |
| (E)-Difluorodiazene           | 12.80 <sup>b</sup> | 13.00 | 12.25 | 11.91 | 11.53 | 12.13 | 12.46 | 12.47 | 12.46 | 12.46 | 12.47 | 12.45 | 12.45 | 12.45 | 12.45 |
| Tetrafluorohydrazine gauche   | 12.84 <sup>a</sup> | 13.04 | 12.47 | 12.46 | 12.27 | 12.92 | 12.90 | 12.87 | 12.88 | 12.87 | 12.87 | 12.59 | 12.60 | 12.59 | 12.59 |
| Difluoroazacyclopropane       | 11.78 <sup>a</sup> | 12.05 | 11.68 | 11.58 | 12.09 | 12.27 | 11.67 | 11.41 | 11.41 | 11.41 | 11.41 | 11.58 | 11.58 | 11.58 | 11.58 |
| Hexafluorodimethylidimine cis | 11.35 <sup>a</sup> | 12.27 | 11.73 | 11.37 | 11.40 | 11.78 | 10.96 | 11.20 | 11.20 | 11.20 | 11.20 | 10.98 | 10.98 | 10.99 | 10.99 |
| 2,4,6-Trifluorotriazine       | 12.00 <sup>a</sup> | 12.70 | 12.27 | 12.09 | 12.15 | 12.39 | 12.33 | 12.29 | 12.29 | 12.29 | 12.29 | 12.15 | 12.15 | 12.15 | 12.15 |
| Pentafluoropyridine           | 10.27 <sup>a</sup> | 10.72 | 10.34 | 10.87 | 11.00 | 11.12 | 10.65 | 10.59 | 10.58 | 10.59 | 10.59 | 10.65 | 10.64 | 10.65 | 10.65 |
| Difluorocarbene               | 12.27 <sup>a</sup> | 12.18 | 11.59 | 11.58 | 12.29 | 12.62 | 11.93 | 12.18 | 12.18 | 12.18 | 12.18 | 12.12 | 12.12 | 12.12 | 12.12 |
| Nitrosyl fluoride             | 12.94 <sup>a</sup> | 12.93 | 12.52 | 11.54 | 11.41 | 11.81 | 12.23 | 12.80 | 12.79 | 12.80 | 12.80 | 13.00 | 13.00 | 13.00 | 13.00 |
| Nitryl fluoride               | 13.51 <sup>a</sup> | 12.99 | 13.39 | 13.37 | 12.84 | 12.74 | 12.84 | 13.69 | 13.69 | 13.69 | 13.69 | 14.08 | 14.08 | 14.08 | 14.08 |

a Taken from the experimental data quoted in: M.J.S. Dewar, H.S. Rzepa, J. Am. Chem. Soc. 100, 58 (1978). b S.G. Lias, J.E. Bartmess, J.F. Liebman, J.L. Holmes, R.D. Levin, and W.G. Mallard, "Gas Phase Ion and Neutral Thermochemistry", J. Phys. Chem. Ref. Data 17, Suppl. 1 (1988).



Table S7: Mean Absolute Errors of the Interaction Energies (kcal/mol) for the S22 and S66x8 Benchmark Sets from Single-Point MNDO, AM1, PM3, PM6, and OM $x$  Calculations at the Reference Geometries

| Subset        | N   | Method |       |      |      |      |      |      |
|---------------|-----|--------|-------|------|------|------|------|------|
|               |     | MNDO   | AM1   | PM3  | PM6  | OM1  | OM2  | OM3  |
| S22           |     |        |       |      |      |      |      |      |
| Overall       | 22  | 16.74  | 6.78  | 5.90 | 3.35 | 5.09 | 3.07 | 3.58 |
| H-bonded      | 7   | 28.16  | 10.74 | 7.42 | 5.03 | 7.82 | 3.63 | 4.20 |
| Mixed         | 7   | 9.96   | 3.27  | 2.79 | 2.03 | 3.34 | 1.80 | 2.57 |
| Dispersion    | 8   | 12.68  | 6.40  | 7.28 | 3.04 | 4.23 | 3.68 | 3.92 |
| S66x8         |     |        |       |      |      |      |      |      |
| Overall       | 528 | 9.48   | 3.76  | 3.32 | 1.98 | 2.96 | 1.93 | 2.23 |
| Electrostatic | 184 | 13.40  | 5.24  | 4.42 | 2.50 | 3.77 | 2.27 | 2.39 |
| Mixed         | 160 | 6.82   | 2.60  | 2.34 | 1.55 | 2.30 | 1.31 | 1.78 |
| Dispersion    | 184 | 7.88   | 3.30  | 3.08 | 1.84 | 2.72 | 2.13 | 2.45 |

Table S8: Mean Absolute Errors in Selected Interatomic Distances ( $\text{\AA}$ ) and Angles (degree) from MNDO, AM1, PM3, PM6, and OM $x$  Optimizations for the S22 Set

| Subset                         | N   | Method |       |       |       |       |       |       |
|--------------------------------|-----|--------|-------|-------|-------|-------|-------|-------|
|                                |     | MNDO   | AM1   | PM3   | PM6   | OM1   | OM2   | OM3   |
| Selected interatomic distances |     |        |       |       |       |       |       |       |
| Overall                        | 105 | 3.117  | 3.635 | 1.557 | 0.383 | 2.336 | 0.708 | 1.996 |
| Selected angles                |     |        |       |       |       |       |       |       |
| Overall                        | 14  | 36.12  | 16.52 | 7.51  | 9.33  | 21.51 | 2.50  | 1.76  |

Table S9: Benchmark Results for the S22 Data Set. Interaction Energies (kcal/mol)

| Complex                                   | Ref.               | MNDO | AM1   | PM3   | PM6   | PM7   | OM1   | OM2   |       | OM3   |       | D3T   | D3    | D3T   |
|-------------------------------------------|--------------------|------|-------|-------|-------|-------|-------|-------|-------|-------|-------|-------|-------|-------|
|                                           |                    |      |       |       |       |       |       | D2    | D3    | D2    | D3    |       |       |       |
| Single point calculations                 |                    |      |       |       |       |       |       |       |       |       |       |       |       |       |
| ammonia dimer -3.17                       | -3.2 <sup>a</sup>  | 4.5  | -0.8  | 0.8   | -2.3  | -4.3  | -1.5  | -2.0  | -2.6  | -2.5  | -1.9  | -2.5  | -2.7  | -2.6  |
| water dimer -5.02 WH                      | -5.0 <sup>a</sup>  | 6.8  | -2.9  | -2.8  | -3.9  | -4.9  | -2.7  | -4.0  | -4.4  | -4.3  | -4.1  | -4.3  | -4.6  | -4.6  |
| formic acid dimer -1                      | -18.8 <sup>a</sup> | 25.0 | 1.5   | -9.9  | -11.1 | -18.6 | -6.1  | -13.6 | -14.9 | -14.8 | -11.5 | -14.8 | -12.9 | -13.3 |
| formamide dimer -15.                      | -16.1 <sup>a</sup> | 16.4 | -5.7  | -8.1  | -12.6 | -16.6 | -7.9  | -13.0 | -14.3 | -14.3 | -11.7 | -13.2 | -13.2 | -13.5 |
| uracil dimer -20.47                       | -20.7 <sup>a</sup> | 16.5 | -5.8  | -11.3 | -13.3 | -19.0 | -11.0 | -17.5 | -19.1 | -19.4 | -16.2 | -19.5 | -18.1 | -18.7 |
| 2-pyridoxine 2-amino                      | -17.0 <sup>a</sup> | 15.1 | -4.5  | -7.5  | -10.0 | -17.9 | -7.1  | -11.0 | -13.0 | -13.3 | -11.3 | -13.4 | -13.7 | -14.2 |
| adenine thymine -16.                      | -16.7 <sup>a</sup> | 15.4 | -4.3  | -6.8  | -9.1  | -17.3 | -6.6  | -11.1 | -13.2 | -13.5 | -11.3 | -13.6 | -13.8 | -14.4 |
| methane dimer -0.53                       | -0.5 <sup>a</sup>  | 1.2  | 0.2   | -0.3  | -0.1  | -0.4  | 0.0   | 0.1   | -0.3  | -0.5  | 0.1   | -0.4  | -0.4  | -0.5  |
| ethene dimer -1.51 W                      | -1.5 <sup>a</sup>  | 4.0  | -0.1  | -1.1  | -0.4  | -1.1  | 0.4   | -0.4  | -1.4  | -1.5  | 0.1   | -1.5  | -1.1  | -1.3  |
| benzene methane -1.5                      | -1.4 <sup>a</sup>  | 3.2  | 0.4   | -0.2  | -0.5  | -1.8  | 0.4   | -0.2  | -1.2  | -1.4  | 0.1   | -1.4  | -1.2  | -1.4  |
| benzene dimer -2.73                       | -2.6 <sup>a</sup>  | 6.4  | 3.5   | 2.4   | 0.1   | -4.2  | 0.9   | 1.3   | -1.5  | -2.4  | 1.1   | -2.2  | -2.2  | -3.1  |
| pyrazine dimer -4.42                      | -4.2 <sup>a</sup>  | 7.8  | 2.5   | 3.9   | -1.8  | -5.7  | -0.5  | -0.9  | -3.9  | -4.4  | -0.7  | -4.3  | -4.3  | -5.0  |
| uracil dimer -9.88 W                      | -9.7 <sup>a</sup>  | 13.5 | 0.1   | 5.8   | -4.5  | -8.6  | -2.7  | -4.3  | -8.6  | -9.3  | -3.9  | -9.1  | -9.2  | -10.0 |
| indole benzene -5.22                      | -4.6 <sup>a</sup>  | 10.4 | 5.4   | 4.0   | 0.1   | -6.0  | 1.3   | 1.5   | -2.6  | -3.5  | 1.4   | -3.3  | -3.6  | -4.5  |
| adenine thymine -12.                      | -11.7 <sup>a</sup> | 18.7 | 2.9   | 7.4   | -4.9  | -11.4 | -2.1  | -4.0  | -10.3 | -10.9 | -3.3  | -10.6 | -11.0 | -11.8 |
| ethene ethyne -1.53                       | -1.5 <sup>a</sup>  | 1.6  | -0.3  | -0.8  | -0.5  | -1.0  | -0.2  | -1.1  | -1.6  | -1.7  | -0.7  | -1.7  | -1.3  | -1.4  |
| benzene water -3.28                       | -3.3 <sup>a</sup>  | 4.5  | -0.7  | -1.5  | -2.3  | -2.8  | -0.9  | -2.3  | -3.4  | -3.5  | -1.7  | -3.5  | -3.1  | -3.3  |
| benzene ammonia -2.3                      | -2.3 <sup>a</sup>  | 3.5  | -0.3  | -0.6  | -1.5  | -2.9  | -0.4  | -1.2  | -2.3  | -2.5  | -0.8  | -2.5  | -2.1  | -2.3  |
| benzene hcn cs -4.46                      | -4.5 <sup>a</sup>  | 6.0  | -0.8  | -1.6  | -2.0  | -3.1  | -0.7  | -3.1  | -4.4  | -4.5  | -1.7  | -4.5  | -3.4  | -3.6  |
| benzene dimer -2.74                       | -2.7 <sup>a</sup>  | 5.4  | 0.4   | -0.4  | -0.8  | -3.3  | 0.6   | -0.6  | -2.3  | -2.7  | 0.1   | -2.7  | -2.0  | -2.5  |
| indole benzene -5.73                      | -5.6 <sup>a</sup>  | 8.8  | -1.0  | -1.3  | -2.4  | -6.0  | -0.2  | -2.4  | -4.8  | -5.3  | -1.2  | -5.2  | -4.1  | -4.6  |
| phenol dimer -7.05 W                      | -7.1 <sup>a</sup>  | 12.8 | -1.4  | -1.4  | -3.4  | -6.3  | -2.0  | -3.8  | -5.8  | -6.2  | -3.2  | -6.1  | -5.6  | -6.1  |
| Full optimizations of dimers and monomers |                    |      |       |       |       |       |       |       |       |       |       |       |       |       |
| ammonia dimer -3.17                       | -3.2 <sup>a</sup>  | -0.8 | -2.0  | -0.7  | -2.4  | -5.8  | -3.6  | -2.0  | -2.5  | -2.5  | -1.9  | -2.5  | -2.6  | -2.5  |
| water dimer -5.02 WH                      | -5.0 <sup>a</sup>  | -1.0 | -5.5  | -3.5  | -4.9  | -6.6  | -4.3  | -4.3  | -4.8  | -4.7  | -4.5  | -4.7  | -5.0  | -5.1  |
| formic acid dimer -1                      | -18.8 <sup>a</sup> | -1.7 | -6.4  | -8.6  | -10.0 | -17.2 | -6.7  | -14.6 | -15.9 | -15.9 | -16.7 | -15.9 | -18.2 | -18.6 |
| formamide dimer -15.                      | -16.1 <sup>a</sup> | -1.5 | -8.1  | -6.1  | -10.8 | -15.2 | -7.4  | -13.0 | -14.5 | -14.5 | -12.4 | -14.5 | -14.0 | -14.6 |
| uracil dimer -20.47                       | -20.7 <sup>a</sup> | -2.7 | -10.2 | -9.6  | -12.5 | -18.6 | -9.8  | -18.8 | -20.6 | -20.9 | -19.5 | -20.9 | -21.6 | -22.4 |
| 2-pyridoxine 2-amino                      | -17.0 <sup>a</sup> | -1.4 | -6.0  | -5.9  | -9.6  | -17.4 | -6.7  | -11.4 | -13.5 | -13.9 | -14.8 | -13.9 | -17.5 | -18.2 |
| adenine thymine -16.                      | -16.7 <sup>a</sup> | -1.0 | -5.0  | -5.7  | -9.0  | -17.4 | -6.2  | -11.5 | -13.9 | -14.3 | -15.1 | -14.3 | -18.1 | -18.8 |
| methane dimer -0.53                       | -0.5 <sup>a</sup>  | 0.0  | -0.0  | -0.9  | -0.2  | -0.5  | 0.0   | 0.0   | -0.7  | -0.5  | 0.0   | -0.5  | -0.4  | -0.5  |
| ethene dimer -1.51 W                      | -1.5 <sup>a</sup>  | 0.0  | -0.1  | -1.1  | -0.4  | -1.1  | -0.0  | -0.4  | -1.6  | -1.5  | -0.1  | -1.5  | -1.2  | -1.3  |
| benzene methane -1.5                      | -1.4 <sup>a</sup>  | 0.0  | -0.0  | -2.4  | -0.5  | -1.8  | -0.0  | -0.2  | -1.3  | -1.5  | -0.1  | -1.5  | -1.2  | -1.4  |
| benzene dimer -2.73                       | -2.6 <sup>a</sup>  | 0.0  | -0.0  | -2.4  | -0.9  | -4.8  | -0.0  | -0.6  | -2.5  | -2.9  | -0.0  | -2.9  | -2.6  | -3.5  |
| pyrazine dimer -4.42                      | -4.2 <sup>a</sup>  | -0.4 | -1.4  | -2.5  | -2.1  | -6.7  | -1.8  | -1.0  | -5.2  | -5.3  | -0.8  | -5.2  | -4.9  | -5.7  |
| uracil dimer -9.88 W                      | -9.7 <sup>a</sup>  | -1.2 | -5.9  | -4.2  | -4.4  | -15.6 | -3.0  | -4.6  | -11.0 | -10.8 | -3.9  | -10.6 | -10.2 | -10.8 |
| indole benzene -5.22                      | -4.6 <sup>a</sup>  | -0.1 | -0.0  | -2.7  | -2.6  | -6.4  | -0.0  | -2.5  | -5.3  | -5.5  | -1.5  | -5.4  | -4.8  | -5.5  |
| adenine thymine -12.                      | -11.7 <sup>a</sup> | -2.3 | -5.1  | -5.7  | -5.2  | -11.8 | -7.0  | -11.6 | -12.4 | -12.1 | -11.8 | -11.8 | -11.5 | -12.1 |
| ethene ethyne -1.53                       | -1.5 <sup>a</sup>  | 0.0  | -0.6  | -1.2  | -0.5  | -1.0  | -0.3  | -2.2  | -3.1  | -3.1  | -0.8  | -3.1  | -1.6  | -1.9  |
| benzene water -3.28                       | -3.3 <sup>a</sup>  | -0.1 | -1.3  | -1.8  | -2.6  | -3.0  | -1.3  | -2.9  | -4.9  | -4.7  | -1.9  | -4.7  | -3.8  | -3.9  |
| benzene ammonia -2.3                      | -2.3 <sup>a</sup>  | -0.1 | -1.0  | -1.0  | -3.0  | -3.0  | -1.1  | -1.4  | -3.3  | -3.3  | -1.2  | -3.3  | -3.2  | -3.4  |
| benzene hcn cs -4.46                      | -4.5 <sup>a</sup>  | -0.1 | -0.9  | -1.9  | -2.0  | -3.0  | -1.1  | -3.3  | -4.8  | -4.8  | -1.8  | -4.8  | -3.3  | -3.6  |

... continued on next page ...

Table S9: . . . continued from previous page . . .

| Complex                                                                         | Ref.               | MNDO | AM1   | PM3   | PM6   | PM7   | OM1   |       | OM2   |       | OM3   |       | OM3   |       | D3T |
|---------------------------------------------------------------------------------|--------------------|------|-------|-------|-------|-------|-------|-------|-------|-------|-------|-------|-------|-------|-----|
|                                                                                 |                    |      |       |       |       |       | OM1   | OM2   | D2    | D3    | D3T   | D2    | D3    | D3T   |     |
| benzene dimer -2.74                                                             | -2.7 <sup>a</sup>  | -0.0 | -0.4  | -3.8  | -0.8  | -4.8  | -0.1  | -0.7  | -2.4  | -2.8  | -0.3  | -2.6  | -3.6  | -3.5  |     |
| indole benzene -5.73                                                            | -5.6 <sup>a</sup>  | -0.2 | -1.3  | -2.9  | -2.6  | -6.0  | -1.0  | -2.5  | -5.3  | -5.7  | -1.5  | -4.8  | -5.6  | -5.5  |     |
| phenol dimer -7.05 W                                                            | -7.1 <sup>a</sup>  | -0.5 | -3.3  | -2.6  | -4.3  | -7.3  | -3.1  | -4.7  | -7.0  | -7.1  | -4.1  | -6.3  | -6.6  | -6.6  |     |
| Full optimizations of dimers, single-point calculations on fragments (monomers) |                    |      |       |       |       |       |       |       |       |       |       |       |       |       |     |
| ammonia dimer -3.17                                                             | -3.2 <sup>a</sup>  | -0.8 | -2.0  | -0.7  | -2.4  | -5.9  | -3.6  | -2.0  | -2.5  | -2.5  | -1.9  | -2.6  | -2.5  | -2.5  |     |
| water dimer -5.02 WH                                                            | -5.0 <sup>a</sup>  | -1.0 | -5.5  | -3.6  | -5.1  | -6.6  | -4.3  | -4.4  | -4.8  | -4.8  | -4.5  | -5.1  | -5.1  | -5.1  |     |
| formic acid dimer -1                                                            | -18.8 <sup>a</sup> | -1.7 | -6.6  | -9.6  | -12.5 | -19.3 | -7.1  | -18.6 | -20.2 | -20.0 | -57.2 | -58.5 | -58.9 | -58.9 |     |
| formamide dimer -15                                                             | -16.1 <sup>a</sup> | -1.5 | -8.4  | -7.0  | -11.8 | -16.0 | -7.7  | -14.3 | -15.7 | -15.8 | -15.2 | -16.9 | -17.6 | -17.6 |     |
| uracil dimer -20.47                                                             | -20.7 <sup>a</sup> | -2.7 | -10.5 | -10.7 | -13.6 | -19.7 | -10.3 | -21.1 | -23.0 | -23.3 | -27.6 | -30.0 | -30.8 | -30.8 |     |
| 2-pyridoxine 2-amino                                                            | -17.0 <sup>a</sup> | -1.5 | -6.2  | -7.1  | -10.4 | -18.1 | -7.0  | -12.8 | -15.1 | -15.4 | -22.5 | -25.5 | -25.7 | -25.7 |     |
| adenine thymine -16                                                             | -16.7 <sup>a</sup> | -1.0 | -5.1  | -6.9  | -9.6  | -18.1 | -6.5  | -13.0 | -15.8 | -16.0 | -23.4 | -26.8 | -26.8 | -26.8 |     |
| methane dimer -0.53                                                             | -0.5 <sup>a</sup>  | -0.0 | -0.0  | -0.9  | -0.2  | -0.5  | 0.0   | 0.0   | -0.7  | -0.5  | 0.0   | -0.4  | -0.5  | -0.5  |     |
| ethene dimer -1.51 W                                                            | -1.5 <sup>a</sup>  | -0.0 | -0.1  | -1.1  | -0.4  | -1.1  | -0.0  | -0.4  | -1.6  | -1.5  | -0.1  | -1.2  | -1.3  | -1.3  |     |
| benzene methane -1.5                                                            | -1.4 <sup>a</sup>  | -0.0 | -0.0  | -2.4  | -0.5  | -1.8  | -0.0  | -0.2  | -1.4  | -1.5  | -0.1  | -1.2  | -1.4  | -1.4  |     |
| benzene dimer -2.73                                                             | -2.6 <sup>a</sup>  | -0.0 | -0.0  | -2.5  | -0.9  | -4.8  | -0.0  | -0.6  | -2.5  | -3.0  | -0.0  | -2.7  | -3.6  | -3.5  |     |
| pyrazine dimer -4.42                                                            | -4.2 <sup>a</sup>  | -0.4 | -1.4  | -2.5  | -2.2  | -6.7  | -1.8  | -1.0  | -5.3  | -5.3  | -0.8  | -5.0  | -5.8  | -5.7  |     |
| uracil dimer -9.88 W                                                            | -9.7 <sup>a</sup>  | -1.2 | -6.0  | -4.3  | -4.9  | -16.4 | -3.7  | -5.6  | -12.4 | -12.1 | -4.6  | -11.3 | -12.1 | -11.9 |     |
| indole benzene -5.22                                                            | -4.6 <sup>a</sup>  | -0.1 | -0.0  | -2.8  | -2.6  | -6.4  | -0.0  | -2.5  | -5.6  | -5.8  | -1.5  | -5.0  | -5.8  | -5.7  |     |
| adenine thymine -12                                                             | -11.7 <sup>a</sup> | -2.4 | -5.2  | -6.5  | -5.9  | -12.7 | -7.2  | -12.7 | -13.4 | -13.1 | -19.0 | -12.2 | -13.2 | -12.8 |     |
| ethene ethyne -1.53                                                             | -1.5 <sup>a</sup>  | 0.0  | -0.6  | -1.2  | -0.5  | -1.0  | -0.3  | -2.2  | -3.1  | -3.2  | -0.8  | -1.7  | -1.9  | -1.9  |     |
| benzene water -3.28                                                             | -3.3 <sup>a</sup>  | -0.1 | -1.3  | -1.8  | -2.7  | -3.0  | -1.3  | -3.0  | -4.9  | -4.7  | -1.9  | -3.8  | -3.9  | -3.9  |     |
| benzene ammonia -2.3                                                            | -2.3 <sup>a</sup>  | -0.1 | -1.0  | -1.0  | -2.1  | -3.0  | -1.1  | -1.4  | -3.4  | -3.4  | -1.2  | -3.2  | -3.4  | -3.4  |     |
| benzene hcn cs -4.46                                                            | -4.5 <sup>a</sup>  | -0.1 | -0.9  | -1.9  | -2.0  | -3.0  | -1.1  | -3.4  | -4.8  | -4.9  | -1.8  | -3.3  | -3.6  | -3.6  |     |
| benzene dimer -2.74                                                             | -2.7 <sup>a</sup>  | -0.0 | -0.4  | -3.9  | -0.9  | -4.8  | -0.1  | -0.7  | -2.4  | -2.8  | -0.3  | -2.7  | -3.6  | -3.5  |     |
| indole benzene -5.73                                                            | -5.6 <sup>a</sup>  | -0.1 | -1.3  | -2.8  | -2.6  | -6.1  | -1.0  | -2.5  | -5.3  | -5.8  | -1.5  | -5.0  | -5.8  | -5.7  |     |
| phenol dimer -7.05 W                                                            | -7.1 <sup>a</sup>  | -0.5 | -3.4  | -2.7  | -4.4  | -7.6  | -3.1  | -4.8  | -7.2  | -7.4  | -4.3  | -6.5  | -6.9  | -6.9  |     |

a P.Jurecka, J.Sponer, J.Cerny, and P.Hobza, Phys.Chem.Chem.Phys. 8, 1985 (2006) ; T.Takatani, E.G.Hohenstein, M.Malagoli, M.S.Marshall, and C.D.Sherrill, J.Chem.Phys. 132, 144104 (2010).

Table S10: Benchmark Results for the S66x8 Data Set. Interaction Energies (kcal/mol)

| Molecule           | Ref.              | MNDO | AMI  | PM3  | PM6  | PM7  | OM1  | OM2  |      | OM3  |      | D3T  | OM3  | OM3  |      | D3T  |
|--------------------|-------------------|------|------|------|------|------|------|------|------|------|------|------|------|------|------|------|
|                    |                   |      |      |      |      |      |      | D2   | D3   | D2   | D3   |      |      | D2   | D3   |      |
| Water-Water_0.90   | -4.6 <sup>a</sup> | 10.0 | -1.2 | -3.5 | -3.8 | -5.6 | -1.8 | -4.3 | -4.8 | -4.7 | -4.7 | -4.4 | -4.9 | -4.4 | -4.9 | -4.9 |
| Water-Water_0.95   | -4.9 <sup>a</sup> | 7.4  | -2.5 | -3.1 | -3.9 | -4.9 | -2.5 | -4.1 | -4.5 | -4.5 | -4.5 | -4.3 | -4.7 | -4.3 | -4.7 | -4.8 |
| Water-Water_1.00   | -4.9 <sup>a</sup> | 5.4  | -3.1 | -2.3 | -3.9 | -4.9 | -2.9 | -3.8 | -4.2 | -4.2 | -4.2 | -4.0 | -4.5 | -4.0 | -4.5 | -4.5 |
| Water-Water_1.05   | -4.7 <sup>a</sup> | 3.8  | -3.2 | -1.8 | -3.7 | -4.8 | -3.1 | -3.5 | -3.8 | -3.8 | -3.8 | -3.8 | -4.2 | -3.8 | -4.2 | -4.3 |
| Water-Water_1.10   | -4.5 <sup>a</sup> | 2.6  | -3.1 | -1.6 | -3.4 | -4.6 | -3.1 | -3.2 | -3.5 | -3.5 | -3.5 | -3.6 | -3.9 | -3.6 | -4.0 | -4.0 |
| Water-Water_1.25   | -3.5 <sup>a</sup> | 0.5  | -2.3 | -1.6 | -2.6 | -3.9 | -2.7 | -2.4 | -2.6 | -2.7 | -2.7 | -2.8 | -3.1 | -2.8 | -3.2 | -3.2 |
| Water-Water_1.50   | -2.1 <sup>a</sup> | -0.5 | -1.2 | -1.1 | -1.6 | -2.8 | -1.8 | -1.6 | -1.7 | -1.8 | -1.8 | -1.9 | -2.0 | -1.9 | -2.1 | -2.1 |
| Water-Water_2.00   | -0.9 <sup>a</sup> | -0.5 | -0.6 | -0.5 | -0.8 | -1.5 | -0.9 | -0.8 | -0.8 | -0.8 | -0.8 | -1.0 | -1.0 | -1.0 | -1.0 | -1.0 |
| Water-MeOH_0.90    | -5.2 <sup>a</sup> | 13.6 | 0.3  | -2.7 | -3.9 | -6.3 | -0.6 | -4.0 | -4.7 | -4.7 | -4.7 | -3.5 | -4.4 | -3.5 | -4.4 | -4.5 |
| Water-MeOH_0.95    | -5.5 <sup>a</sup> | 10.3 | 1.5  | -2.8 | -4.2 | -5.2 | -1.6 | 4.0  | -4.6 | -4.6 | -4.6 | -3.7 | 4.4  | -3.7 | 4.4  | -4.5 |
| Water-MeOH_1.00    | -5.6 <sup>a</sup> | 7.7  | -2.5 | -2.2 | -4.2 | -5.0 | -2.3 | -3.8 | -4.4 | -4.4 | -4.4 | -3.6 | -4.3 | -3.6 | -4.4 | -4.4 |
| Water-MeOH_1.05    | -5.4 <sup>a</sup> | 5.7  | -2.9 | -1.7 | -4.1 | -5.0 | -2.6 | -3.5 | -4.1 | -4.1 | -4.1 | -3.5 | -4.1 | -3.5 | -4.1 | -4.2 |
| Water-MeOH_1.10    | -5.1 <sup>a</sup> | 4.1  | -2.9 | -1.4 | -3.8 | -4.8 | -2.8 | -3.3 | -3.8 | -3.8 | -3.8 | -3.3 | -3.9 | -3.3 | -4.0 | -4.0 |
| Water-MeOH_1.25    | -3.9 <sup>a</sup> | 1.3  | -2.2 | -1.5 | -3.0 | -4.2 | -2.6 | -2.5 | -2.9 | -2.9 | -2.9 | -2.8 | -3.2 | -2.8 | -3.3 | -3.3 |
| Water-MeOH_1.50    | -2.4 <sup>a</sup> | -0.3 | -1.2 | -1.1 | -1.8 | -3.0 | -1.8 | -1.7 | -1.9 | -1.9 | -1.9 | -1.9 | -2.1 | -1.9 | -2.2 | -2.2 |
| Water-MeOH_2.00    | -1.0 <sup>a</sup> | -0.5 | -0.6 | -0.5 | -0.9 | -1.6 | -0.9 | -0.8 | -0.9 | -0.9 | -0.9 | -0.9 | -1.0 | -0.9 | -1.0 | -1.0 |
| Water-MeNH2_0.90   | -6.5 <sup>a</sup> | 10.6 | 1.2  | -2.6 | -3.2 | -5.9 | -0.8 | -4.5 | -5.2 | -5.3 | -5.3 | -5.7 | -6.6 | -5.7 | -6.7 | -6.7 |
| Water-MeNH2_0.95   | -6.9 <sup>a</sup> | 7.9  | -0.0 | -2.5 | -3.9 | -6.6 | -1.9 | -4.5 | -5.1 | -5.2 | -5.2 | -5.4 | -6.2 | -5.4 | -6.3 | -6.3 |
| Water-MeNH2_1.00   | -6.9 <sup>a</sup> | 5.9  | -0.7 | -1.9 | -4.2 | -6.9 | -2.6 | -4.3 | -4.9 | -4.9 | -4.9 | -5.0 | -5.7 | -5.0 | -5.8 | -5.8 |
| Water-MeNH2_1.05   | -6.6 <sup>a</sup> | 4.3  | -1.0 | -1.5 | -4.3 | -6.9 | -3.0 | -4.0 | -4.5 | -4.6 | -4.6 | -4.5 | -5.1 | -4.5 | -5.3 | -5.3 |
| Water-MeNH2_1.10   | -6.3 <sup>a</sup> | 3.0  | -1.3 | -1.4 | -4.3 | -6.8 | -3.2 | -3.7 | -4.2 | -4.2 | -4.2 | -4.1 | -4.7 | -4.1 | -4.8 | -4.8 |
| Water-MeNH2_1.25   | -4.9 <sup>a</sup> | 0.7  | -1.7 | -1.4 | -3.7 | -5.7 | -3.0 | -2.8 | -3.2 | -3.3 | -3.3 | -3.1 | -3.6 | -3.1 | -3.6 | -3.6 |
| Water-MeNH2_1.50   | -3.0 <sup>a</sup> | -0.5 | -1.3 | -1.0 | -2.4 | -4.0 | -2.1 | -1.8 | -2.0 | -2.1 | -2.1 | -2.0 | -2.2 | -2.0 | -2.3 | -2.3 |
| Water-MeNH2_2.00   | -1.1 <sup>a</sup> | -0.5 | -0.6 | -0.5 | -1.1 | -2.1 | -1.0 | -0.8 | -0.9 | -0.9 | -0.9 | -0.9 | -1.0 | -0.9 | -1.0 | -1.0 |
| Water-Peptide_0.90 | -7.6 <sup>a</sup> | 16.7 | 0.3  | -3.8 | -5.8 | -9.0 | -2.4 | -6.5 | -7.5 | -7.5 | -7.5 | -6.0 | -7.1 | -6.0 | -7.3 | -7.3 |
| Water-Peptide_0.95 | -8.1 <sup>a</sup> | 13.0 | -2.0 | -4.6 | -6.2 | -8.3 | -3.3 | -6.4 | -7.3 | -7.3 | -7.3 | -5.9 | -7.0 | -5.9 | -7.1 | -7.2 |
| Water-Peptide_1.00 | -8.1 <sup>a</sup> | 10.0 | -3.3 | -4.2 | -6.3 | -7.4 | -3.8 | -6.0 | -6.9 | -6.9 | -6.9 | -5.7 | -6.8 | -5.7 | -6.9 | -6.9 |
| Water-Peptide_1.05 | -7.8 <sup>a</sup> | 7.6  | -3.9 | -3.5 | -6.1 | -7.1 | -4.1 | -5.6 | -6.5 | -6.4 | -6.4 | -5.4 | -6.4 | -5.4 | -6.5 | -6.5 |
| Water-Peptide_1.10 | -7.5 <sup>a</sup> | 5.6  | -4.1 | -3.0 | -5.8 | -6.9 | -4.2 | -5.2 | -6.0 | -6.0 | -6.0 | -5.1 | -6.0 | -5.1 | -6.1 | -6.1 |
| Water-Peptide_1.25 | -6.0 <sup>a</sup> | 2.0  | -3.4 | -2.8 | -4.7 | -5.9 | -3.9 | -4.1 | -4.6 | -4.7 | -4.7 | -4.2 | -4.9 | -4.2 | -5.0 | -5.0 |
| Water-Peptide_1.50 | -3.8 <sup>a</sup> | -0.3 | -2.0 | -2.1 | -3.0 | -4.2 | -2.8 | -2.8 | -3.1 | -3.2 | -3.2 | -3.0 | -3.4 | -3.0 | -3.5 | -3.5 |
| Water-Peptide_2.00 | -1.4 <sup>a</sup> | -0.7 | -0.9 | -0.9 | -1.3 | -2.2 | -1.3 | -1.3 | -1.3 | -1.4 | -1.4 | -1.4 | -1.5 | -1.4 | -1.5 | -1.5 |
| MeOH-MeOH_0.90     | -5.3 <sup>a</sup> | 14.2 | 1.4  | -2.3 | -2.9 | -5.9 | -0.5 | -3.3 | -4.2 | -4.2 | -4.2 | -2.9 | -3.9 | -2.9 | -4.1 | -4.1 |
| MeOH-MeOH_0.95     | -5.7 <sup>a</sup> | 10.8 | -0.7 | -2.7 | -3.4 | -4.9 | -1.5 | -3.4 | -4.2 | -4.2 | -4.2 | -3.1 | -4.0 | -3.1 | -4.2 | -4.2 |
| MeOH-MeOH_1.00     | -5.7 <sup>a</sup> | 8.2  | -2.0 | -2.2 | -3.5 | -4.6 | -2.1 | -3.3 | -4.0 | -4.1 | -4.1 | -3.1 | -4.0 | -3.1 | -4.1 | -4.1 |
| MeOH-MeOH_1.05     | -5.6 <sup>a</sup> | 6.1  | -2.5 | -1.6 | -3.5 | -4.7 | -2.5 | -3.1 | -3.7 | -3.8 | -3.8 | -3.0 | -3.8 | -3.0 | -3.9 | -3.9 |
| MeOH-MeOH_1.10     | -5.3 <sup>a</sup> | 4.5  | -2.7 | -1.3 | -3.3 | -4.6 | -2.7 | -2.8 | -3.4 | -3.5 | -3.5 | -2.9 | -3.6 | -2.9 | -3.7 | -3.7 |
| MeOH-MeOH_1.25     | -4.1 <sup>a</sup> | 1.4  | -2.2 | -1.4 | -2.6 | -4.1 | -2.5 | -2.2 | -2.6 | -2.7 | -2.7 | -2.4 | -3.0 | -2.4 | -3.1 | -3.1 |
| MeOH-MeOH_1.50     | -2.5 <sup>a</sup> | -0.3 | -1.2 | -1.0 | -1.6 | -3.0 | -1.7 | -1.4 | -1.7 | -1.8 | -1.8 | -1.7 | -1.9 | -1.7 | -2.0 | -2.0 |
| MeOH-MeOH_2.00     | -1.0 <sup>a</sup> | -0.5 | -0.5 | -0.5 | -0.8 | -1.6 | -0.8 | -0.7 | -0.8 | -0.8 | -0.8 | -0.8 | -0.9 | -0.8 | -0.9 | -0.9 |
| MeOH-MeNH2_0.90    | -7.0 <sup>a</sup> | 13.1 | 2.1  | -2.5 | -1.7 | -4.5 | -0.6 | -3.8 | -5.1 | -5.1 | -5.1 | -5.1 | -6.6 | -5.1 | -6.8 | -6.8 |
| MeOH-MeNH2_0.95    | -7.5 <sup>a</sup> | 10.0 | 0.6  | -2.7 | -2.7 | -5.6 | -1.7 | -3.9 | -5.0 | -5.1 | -5.1 | -4.9 | -6.2 | -4.9 | -6.4 | -6.4 |
| MeOH-MeNH2_1.00    | -7.5 <sup>a</sup> | 7.5  | -0.2 | -2.2 | -3.2 | -6.2 | -2.5 | -3.7 | -4.7 | -4.9 | -4.8 | -4.5 | -5.7 | -4.5 | -5.9 | -5.9 |
| MeOH-MeNH2_1.05    | -7.3 <sup>a</sup> | 5.6  | -0.6 | -1.7 | -3.5 | -6.4 | -2.9 | -3.5 | -4.4 | -4.5 | -4.5 | -4.1 | -5.2 | -4.1 | -5.4 | -5.4 |

... continued on next page ...

Table S10: . . . continued from previous page . . .

| Molecule           | Ref.              | MNDO | AMI  | PM3  | PM6  | PM7  | OM2  |      | OM3  |      | D3T  |      |      |      |
|--------------------|-------------------|------|------|------|------|------|------|------|------|------|------|------|------|------|
|                    |                   |      |      |      |      |      | D2   | D3   | D2   | D3   |      |      |      |      |
| MeOH-MeNH2_1.10    | -7.0 <sup>a</sup> | 4.1  | -0.9 | -1.4 | -3.6 | -6.4 | -3.2 | -3.3 | -4.0 | -4.2 | -4.2 | -3.8 | -4.7 | -4.9 |
| MeOH-MeNH2_1.25    | -5.5 <sup>a</sup> | 1.2  | -1.4 | -1.4 | -3.2 | -5.7 | -3.1 | -2.5 | -3.1 | -3.2 | -3.2 | -2.8 | -3.5 | -3.7 |
| MeOH-MeNH2_1.50    | -3.3 <sup>a</sup> | -0.4 | -1.3 | -1.0 | -2.1 | -4.1 | -2.1 | -1.6 | -1.9 | -2.0 | -2.0 | -1.8 | -2.2 | -2.3 |
| MeOH-MeNH2_2.00    | -1.3 <sup>a</sup> | -0.5 | -0.6 | -0.5 | -0.9 | -2.1 | -1.0 | -0.7 | -0.8 | -0.9 | -0.9 | -0.8 | -0.9 | -1.0 |
| MeOH-Peptide_0.90  | -7.6 <sup>a</sup> | 18.2 | 2.0  | -2.8 | -4.1 | -7.8 | -1.6 | -5.2 | -6.5 | -6.6 | -6.6 | -4.7 | -6.2 | -6.4 |
| MeOH-Peptide_0.95  | -8.1 <sup>a</sup> | 14.3 | -0.6 | -4.0 | -4.7 | -7.6 | -2.5 | -5.2 | -6.4 | -6.5 | -6.5 | -4.7 | -6.2 | -6.4 |
| MeOH-Peptide_1.00  | -8.2 <sup>a</sup> | 11.2 | -2.2 | -3.9 | -5.0 | -6.6 | -3.0 | -4.9 | -6.1 | -6.1 | -6.1 | -4.5 | -5.9 | -6.1 |
| MeOH-Peptide_1.05  | -8.0 <sup>a</sup> | 8.7  | -3.1 | -3.2 | -4.9 | -6.4 | -3.4 | -4.6 | -5.6 | -5.7 | -5.7 | -4.3 | -5.6 | -5.8 |
| MeOH-Peptide_1.10  | -7.7 <sup>a</sup> | 6.6  | -3.4 | -2.7 | -4.7 | -6.3 | -3.5 | -4.2 | -5.2 | -5.3 | -5.3 | -4.1 | -5.2 | -5.4 |
| MeOH-Peptide_1.25  | -6.2 <sup>a</sup> | 2.6  | -3.0 | -2.4 | -3.8 | -5.5 | -3.3 | -3.2 | -4.0 | -4.1 | -4.1 | -3.3 | -4.2 | -4.4 |
| MeOH-Peptide_1.50  | -3.6 <sup>a</sup> | -0.1 | -1.6 | -1.8 | -2.2 | -3.8 | -2.2 | -2.0 | -2.3 | -2.5 | -2.5 | -2.1 | -2.6 | -2.8 |
| MeOH-Peptide_2.00  | -1.1 <sup>a</sup> | -0.5 | -0.5 | -0.6 | -0.8 | -1.6 | -0.8 | -0.7 | -0.8 | -0.9 | -0.9 | -0.8 | -0.9 | -1.0 |
| MeOH-Water_0.90    | -4.6 <sup>a</sup> | 10.7 | -0.2 | -3.2 | -2.8 | -5.1 | -1.6 | -3.6 | -4.2 | -4.2 | -4.2 | -3.6 | -4.3 | -4.4 |
| MeOH-Water_0.95    | -5.0 <sup>a</sup> | 8.0  | -1.8 | -3.0 | -3.1 | -4.3 | -2.3 | -3.5 | -4.0 | -4.0 | -4.0 | -3.6 | -4.2 | -4.3 |
| MeOH-Water_1.00    | -5.0 <sup>a</sup> | 5.9  | -2.6 | -2.2 | -3.2 | -4.3 | -2.7 | -3.3 | -3.7 | -3.7 | -3.7 | -3.4 | -4.0 | -4.1 |
| MeOH-Water_1.05    | -4.8 <sup>a</sup> | 4.2  | -2.9 | -1.7 | -3.1 | -4.4 | -2.9 | -3.0 | -3.4 | -3.4 | -3.4 | -3.3 | -3.7 | -3.8 |
| MeOH-Water_1.10    | -4.6 <sup>a</sup> | 2.9  | -2.9 | -1.5 | -3.0 | -4.3 | -3.0 | -2.7 | -3.1 | -3.2 | -3.2 | -3.1 | -3.5 | -3.6 |
| MeOH-Water_1.25    | -3.6 <sup>a</sup> | 0.7  | -2.2 | -1.5 | -2.3 | -3.7 | -2.6 | -2.1 | -2.4 | -2.4 | -2.4 | -2.5 | -2.8 | -2.9 |
| MeOH-Water_1.50    | -2.2 <sup>a</sup> | -0.5 | -1.2 | -1.0 | -1.4 | -2.7 | -1.8 | -1.4 | -1.5 | -1.6 | -1.6 | -1.7 | -1.8 | -1.9 |
| MeOH-Water_2.00    | -0.9 <sup>a</sup> | -0.5 | -0.5 | -0.5 | -0.7 | -1.5 | -0.8 | -0.7 | -0.7 | -0.7 | -0.7 | -0.8 | -0.9 | -0.9 |
| MeNH2-MeOH_0.90    | -2.8 <sup>a</sup> | 8.6  | -1.5 | 0.1  | -2.3 | -4.5 | -0.5 | -1.5 | -2.5 | -2.6 | -2.6 | -0.9 | -2.2 | -2.3 |
| MeNH2-MeOH_0.95    | -3.0 <sup>a</sup> | 6.2  | -1.8 | 0.1  | -2.3 | -4.6 | -1.1 | -1.5 | -2.3 | -2.5 | -2.5 | -1.2 | -2.2 | -2.4 |
| MeNH2-MeOH_1.00    | -3.0 <sup>a</sup> | 4.4  | -1.8 | -0.2 | -2.2 | -4.5 | -1.4 | -1.4 | -2.1 | -2.3 | -2.3 | -1.2 | -2.2 | -2.3 |
| MeNH2-MeOH_1.05    | -2.9 <sup>a</sup> | 3.1  | -1.6 | -0.5 | -2.0 | -4.3 | -1.4 | -1.3 | -1.9 | -2.1 | -2.1 | -1.2 | -2.1 | -2.2 |
| MeNH2-MeOH_1.10    | -2.7 <sup>a</sup> | 2.1  | -1.4 | -0.6 | -1.7 | -4.1 | -1.4 | -1.2 | -1.7 | -1.9 | -1.9 | -1.2 | -1.9 | -2.0 |
| MeNH2-MeOH_1.25    | -2.0 <sup>a</sup> | 0.5  | -0.8 | -0.6 | -1.1 | -3.3 | -1.1 | -0.8 | -1.2 | -1.4 | -1.4 | -0.9 | -1.4 | -1.5 |
| MeNH2-MeOH_1.50    | -1.1 <sup>a</sup> | -0.2 | -0.4 | -0.4 | -0.6 | -2.2 | -0.7 | -0.5 | -0.7 | -0.8 | -0.8 | -0.6 | -0.8 | -0.9 |
| MeNH2-MeOH_2.00    | -0.4 <sup>a</sup> | -0.2 | -0.2 | -0.2 | -0.3 | -1.0 | -0.3 | -0.2 | -0.3 | -0.3 | -0.3 | -0.3 | -0.3 | -0.3 |
| MeNH2-MeNH2_0.90   | -3.7 <sup>a</sup> | 12.3 | 1.4  | 2.1  | -0.4 | -4.4 | 1.1  | -0.8 | -2.2 | -2.2 | -2.1 | -0.4 | -2.2 | -2.2 |
| MeNH2-MeNH2_0.95   | -4.1 <sup>a</sup> | 9.1  | 0.5  | 1.3  | -1.4 | -5.1 | -0.2 | -1.3 | -2.6 | -2.6 | -2.6 | -1.0 | -2.6 | -2.7 |
| MeNH2-MeNH2_1.00   | -4.2 <sup>a</sup> | 6.7  | -0.1 | 0.6  | -2.0 | -5.4 | -0.9 | -1.5 | -2.7 | -2.7 | -2.7 | -1.3 | -2.7 | -2.8 |
| MeNH2-MeNH2_1.05   | -4.0 <sup>a</sup> | 4.9  | -0.5 | 0.1  | -2.2 | -5.4 | -1.3 | -1.6 | -2.6 | -2.7 | -2.7 | -1.4 | -2.7 | -2.7 |
| MeNH2-MeNH2_1.10   | -3.8 <sup>a</sup> | 3.5  | -0.7 | -0.3 | -2.2 | -5.2 | -1.5 | -1.6 | -2.4 | -2.5 | -2.5 | -1.4 | -2.5 | -2.6 |
| MeNH2-MeNH2_1.25   | -2.8 <sup>a</sup> | 1.1  | -0.8 | -0.5 | -1.7 | -4.2 | -1.4 | -1.2 | -1.7 | -1.9 | -1.9 | -1.2 | -1.8 | -2.0 |
| MeNH2-MeNH2_1.50   | -1.3 <sup>a</sup> | -0.1 | -0.4 | -0.3 | -0.8 | -2.5 | -0.7 | -0.6 | -0.8 | -1.0 | -1.0 | -0.6 | -0.9 | -1.0 |
| MeNH2-MeNH2_2.00   | -0.4 <sup>a</sup> | -0.2 | -0.2 | -0.1 | -0.3 | -1.1 | -0.3 | -0.2 | -0.3 | -0.3 | -0.3 | -0.2 | -0.3 | -0.3 |
| MeNH2-Peptide_0.90 | -4.9 <sup>a</sup> | 14.8 | -0.6 | 1.9  | -3.4 | -5.9 | -0.6 | -2.8 | -4.7 | -4.7 | -4.7 | -1.7 | -4.0 | -4.2 |
| MeNH2-Peptide_0.95 | -5.4 <sup>a</sup> | 11.1 | -1.6 | 1.2  | -3.8 | -6.2 | -1.4 | -2.9 | -4.6 | -4.7 | -4.6 | -2.0 | -4.2 | -4.3 |
| MeNH2-Peptide_1.00 | -5.4 <sup>a</sup> | 8.4  | -2.0 | 0.4  | -3.8 | -6.2 | -1.9 | -2.8 | -4.3 | -4.5 | -4.4 | -2.2 | -4.2 | -4.3 |
| MeNH2-Peptide_1.05 | -5.2 <sup>a</sup> | 6.2  | -2.0 | -0.3 | -3.7 | -6.0 | -2.2 | -2.6 | -4.0 | -4.2 | -4.2 | -2.2 | -4.0 | -4.1 |
| MeNH2-Peptide_1.10 | -4.9 <sup>a</sup> | 4.5  | -1.9 | -0.7 | -3.4 | -5.7 | -2.2 | -2.5 | -3.7 | -3.9 | -3.9 | -2.2 | -3.7 | -3.9 |
| MeNH2-Peptide_1.25 | -3.2 <sup>a</sup> | 0.8  | -1.2 | -1.0 | -2.1 | -4.1 | -1.7 | -1.6 | -2.3 | -2.6 | -2.5 | -1.6 | -2.4 | -2.6 |
| MeNH2-Peptide_1.50 | -1.4 <sup>a</sup> | -0.3 | -0.6 | -0.6 | -1.0 | -2.3 | -0.9 | -0.8 | -1.1 | -1.2 | -1.2 | -0.8 | -1.1 | -1.2 |
| MeNH2-Peptide_2.00 | -0.5 <sup>a</sup> | -0.3 | -0.3 | -0.3 | -0.4 | -0.8 | -0.4 | -0.3 | -0.4 | -0.5 | -0.5 | -0.3 | -0.4 | -0.5 |
| MeNH2-Water_0.90   | -6.7 <sup>a</sup> | 14.0 | 2.1  | -1.8 | -2.5 | -5.1 | 0.1  | -4.2 | -5.1 | -5.1 | -5.1 | -5.2 | -6.2 | -6.4 |

. . . continued on next page . . .

Table S10: . . . continued from previous page . . .

| Molecule              | Ref.               | MNDO | AMI  | PM3  | PM6   | PM7   | OM1  | OM2   |       | OM3   |       | D3T   |       |
|-----------------------|--------------------|------|------|------|-------|-------|------|-------|-------|-------|-------|-------|-------|
|                       |                    |      |      |      |       |       |      | D2    | D3    | D2    | D3    |       |       |
| MeNH2-Water.0.95      | -7.2 <sup>a</sup>  | 10.7 | 0.5  | -2.2 | -3.5  | -6.1  | -1.2 | -4.4  | -5.2  | -5.2  | -5.1  | -6.2  | -6.2  |
| MeNH2-Water.1.00      | -7.2 <sup>a</sup>  | 8.2  | -0.4 | -1.9 | -4.0  | -6.6  | -2.1 | -4.3  | -5.1  | -5.0  | -4.9  | -5.8  | -5.9  |
| MeNH2-Water.1.05      | -7.0 <sup>a</sup>  | 6.1  | -0.9 | -1.5 | -4.3  | -6.8  | -2.7 | -4.1  | -4.8  | -4.8  | -4.5  | -5.4  | -5.5  |
| MeNH2-Water.1.10      | -6.7 <sup>a</sup>  | 4.5  | -1.1 | -1.3 | -4.4  | -6.7  | -3.0 | -3.8  | -4.5  | -4.5  | -4.2  | -5.0  | -5.1  |
| MeNH2-Water.1.25      | -5.2 <sup>a</sup>  | 1.5  | -1.6 | -1.4 | -3.9  | -5.8  | -3.0 | -3.0  | -3.5  | -3.6  | -3.3  | -3.9  | -3.9  |
| MeNH2-Water.1.50      | -3.2 <sup>a</sup>  | -0.2 | -1.3 | -1.0 | -2.5  | -4.1  | -2.1 | -2.0  | -2.2  | -2.3  | -2.2  | -2.4  | -2.5  |
| MeNH2-Water.2.00      | -1.2 <sup>a</sup>  | -0.5 | -0.6 | -0.5 | -1.1  | -2.2  | -1.0 | -0.9  | -1.0  | -1.0  | -1.0  | -1.1  | -1.1  |
| Peptide-MeOH.0.90     | -5.7 <sup>a</sup>  | 14.0 | 0.1  | -1.1 | -3.6  | -5.8  | -1.2 | -3.8  | -5.1  | -5.3  | -2.9  | -4.6  | -4.8  |
| Peptide-MeOH.0.95     | -6.1 <sup>a</sup>  | 10.6 | -1.8 | -1.2 | -4.1  | -6.3  | -2.1 | -3.9  | -5.2  | -5.3  | -3.3  | -4.8  | -5.0  |
| Peptide-MeOH.1.00     | -6.2 <sup>a</sup>  | 7.9  | -2.8 | -0.9 | -4.2  | -6.5  | -2.6 | -3.9  | -5.0  | -5.2  | -3.4  | -4.8  | -5.0  |
| Peptide-MeOH.1.05     | -6.0 <sup>a</sup>  | 5.8  | -3.1 | -0.8 | -4.2  | -6.5  | -2.9 | -3.7  | -4.7  | -4.9  | -3.4  | -4.6  | -4.9  |
| Peptide-MeOH.1.10     | -5.7 <sup>a</sup>  | 4.2  | -3.0 | -1.0 | -4.0  | -6.3  | -3.0 | -3.5  | -4.4  | -4.6  | -3.3  | -4.4  | -4.7  |
| Peptide-MeOH.1.25     | -4.6 <sup>a</sup>  | 1.2  | -2.3 | -1.5 | -3.1  | -5.4  | -2.7 | -2.8  | -3.5  | -3.7  | -2.9  | -3.7  | -3.9  |
| Peptide-MeOH.1.50     | -2.9 <sup>a</sup>  | -0.4 | -1.4 | -1.2 | -2.0  | -3.8  | -2.0 | -2.0  | -2.3  | -2.5  | -2.5  | -2.7  | -2.6  |
| Peptide-MeOH.2.00     | -1.3 <sup>a</sup>  | -0.6 | -0.7 | -0.7 | -1.1  | -2.0  | -1.1 | -1.1  | -1.2  | -1.3  | -1.1  | -1.3  | -1.3  |
| Peptide-MeNH2.0.90    | -6.8 <sup>a</sup>  | 12.3 | 0.0  | -2.1 | -2.7  | -8.1  | -1.3 | -3.7  | -5.4  | -5.6  | -4.0  | -6.1  | -6.3  |
| Peptide-MeNH2.0.95    | -7.3 <sup>a</sup>  | 9.3  | -0.9 | -1.9 | -3.7  | -9.0  | -2.4 | -4.1  | -5.6  | -5.8  | -4.2  | -6.1  | -6.3  |
| Peptide-MeNH2.1.00    | -7.5 <sup>a</sup>  | 7.0  | -1.3 | -1.5 | -4.2  | -9.4  | -3.0 | -4.1  | -5.5  | -5.7  | -4.2  | -5.8  | -6.1  |
| Peptide-MeNH2.1.05    | -7.3 <sup>a</sup>  | 5.1  | -1.6 | -1.4 | -4.5  | -9.4  | -3.4 | -4.0  | -5.2  | -5.5  | -4.0  | -5.5  | -5.8  |
| Peptide-MeNH2.1.10    | -7.0 <sup>a</sup>  | 3.6  | -1.7 | -1.4 | -4.5  | -9.2  | -3.6 | -3.8  | -4.9  | -5.2  | -3.8  | -5.2  | -5.5  |
| Peptide-MeNH2.1.25    | -5.6 <sup>a</sup>  | 0.9  | -2.0 | -1.6 | -3.9  | -7.8  | -3.3 | -3.1  | -3.9  | -4.2  | -3.2  | -4.1  | -4.3  |
| Peptide-MeNH2.1.50    | -3.6 <sup>a</sup>  | -0.6 | -1.5 | -1.2 | -2.6  | -5.5  | -2.3 | -2.1  | -2.5  | -2.8  | -2.2  | -2.7  | -2.9  |
| Peptide-MeNH2.2.00    | -1.5 <sup>a</sup>  | -0.7 | -0.9 | -0.7 | -1.3  | -2.8  | -1.2 | -1.1  | -1.2  | -1.3  | -1.1  | -1.3  | -1.4  |
| Peptide-Peptide.0.90  | -8.0 <sup>a</sup>  | 16.0 | 0.1  | -2.9 | -5.4  | -9.0  | -2.3 | -5.4  | -7.4  | -7.7  | -4.2  | -6.6  | -7.0  |
| Peptide-Peptide.0.95  | -8.5 <sup>a</sup>  | 12.4 | -2.2 | -3.1 | -5.8  | -9.4  | -3.1 | -5.4  | -7.2  | -7.6  | -4.4  | -6.6  | -7.0  |
| Peptide-Peptide.1.00  | -8.6 <sup>a</sup>  | 9.5  | -3.3 | -2.7 | -5.9  | -9.4  | -3.6 | -5.2  | -6.9  | -7.2  | -4.5  | -6.5  | -6.9  |
| Peptide-Peptide.1.05  | -8.4 <sup>a</sup>  | 7.1  | -3.7 | -2.2 | -5.7  | -9.3  | -3.8 | -4.9  | -6.4  | -6.8  | -4.4  | -6.2  | -6.6  |
| Peptide-Peptide.1.10  | -8.1 <sup>a</sup>  | 5.3  | -3.7 | -2.1 | -5.4  | -8.9  | -3.8 | -4.6  | -5.9  | -6.3  | -4.2  | -5.8  | -6.2  |
| Peptide-Peptide.1.25  | -6.7 <sup>a</sup>  | 1.8  | -2.9 | -2.4 | -4.3  | -7.6  | -3.5 | -3.7  | -4.7  | -5.0  | -3.6  | -4.8  | -5.1  |
| Peptide-Peptide.1.50  | -4.4 <sup>a</sup>  | -0.4 | -1.8 | -1.9 | -2.8  | -5.5  | -2.5 | -2.6  | -3.1  | -3.4  | -2.6  | -3.2  | -3.5  |
| Peptide-Peptide.2.00  | -1.8 <sup>a</sup>  | -0.7 | -0.9 | -0.9 | -1.3  | -2.7  | -1.2 | -1.2  | -1.4  | -1.5  | -1.3  | -1.5  | -1.6  |
| Peptide-Water.0.90    | -4.7 <sup>a</sup>  | 9.1  | -1.8 | -2.2 | -3.6  | -5.8  | -2.4 | -4.0  | -4.7  | -4.8  | -3.7  | -4.6  | -4.7  |
| Peptide-Water.0.95    | -5.1 <sup>a</sup>  | 6.6  | -3.0 | -1.7 | -3.8  | -6.1  | -2.9 | -3.9  | -4.5  | -4.6  | -3.8  | -4.5  | -4.7  |
| Peptide-Water.1.00    | -5.1 <sup>a</sup>  | 4.7  | -3.4 | -1.3 | -3.8  | -6.1  | -3.2 | -3.7  | -4.3  | -4.4  | -3.7  | -4.4  | -4.5  |
| Peptide-Water.1.05    | -5.0 <sup>a</sup>  | 3.2  | -3.3 | -1.2 | -3.7  | -6.0  | -3.3 | -3.5  | -4.0  | -4.1  | -3.6  | -4.2  | -4.3  |
| Peptide-Water.1.10    | -4.7 <sup>a</sup>  | 2.1  | -3.1 | -1.4 | -3.4  | -5.7  | -3.2 | -3.2  | -3.7  | -3.8  | -3.4  | -4.0  | -4.1  |
| Peptide-Water.1.25    | -3.8 <sup>a</sup>  | 0.1  | -2.3 | -1.6 | -2.7  | -4.8  | -2.8 | -2.6  | -2.9  | -3.0  | -2.8  | -3.2  | -3.3  |
| Peptide-Water.1.50    | -2.4 <sup>a</sup>  | -0.8 | -1.3 | -1.2 | -1.8  | -3.4  | -1.9 | -1.8  | -2.0  | -2.1  | -2.0  | -2.2  | -2.3  |
| Peptide-Water.2.00    | -1.1 <sup>a</sup>  | -0.6 | -0.7 | -0.7 | -1.0  | -1.8  | -1.1 | -1.0  | -1.0  | -1.1  | -1.1  | -1.1  | -1.2  |
| Uracil-Uracil_BP.0.90 | -15.7 <sup>a</sup> | 27.5 | 6.5  | -3.1 | -9.0  | -14.5 | -6.7 | -14.8 | -16.6 | -16.9 | -13.8 | -15.8 | -16.6 |
| Uracil-Uracil_BP.0.95 | -16.9 <sup>a</sup> | 21.9 | 0.1  | -7.3 | -10.7 | -15.7 | -7.6 | -14.5 | -16.3 | -16.5 | -13.3 | -15.3 | -15.9 |
| Uracil-Uracil_BP.1.00 | -17.2 <sup>a</sup> | 17.1 | -4.2 | -8.3 | -11.4 | -16.1 | -8.1 | -13.7 | -15.3 | -15.6 | -12.6 | -14.4 | -15.0 |
| Uracil-Uracil_BP.1.05 | -16.9 <sup>a</sup> | 13.2 | -6.8 | -7.3 | -11.4 | -16.0 | -8.4 | -12.7 | -14.1 | -14.4 | -11.7 | -13.4 | -14.0 |
| Uracil-Uracil_BP.1.10 | -16.2 <sup>a</sup> | 9.9  | -8.0 | -5.8 | -10.9 | -15.6 | -8.4 | -11.5 | -12.9 | -13.2 | -10.8 | -12.4 | -12.9 |
| Uracil-Uracil_BP.1.25 | -13.2 <sup>a</sup> | 3.4  | -7.3 | -3.8 | -8.8  | -13.5 | -7.5 | -8.6  | -9.6  | -9.9  | -8.4  | -9.7  | -10.1 |

. . . continued on next page . . .

Table S10: . . . continued from previous page . . .

| Molecule              | Ref.               | MNDO | AMI  | PM3   | PM6   | PM7   | OM2   |       | OM3   |       | OM3   |       | D3T   |       |
|-----------------------|--------------------|------|------|-------|-------|-------|-------|-------|-------|-------|-------|-------|-------|-------|
|                       |                    |      |      |       |       |       | OM1   | OM2   | D2    | D3    | OM3   | D3    |       |       |
| Uracil-Uracil_BP_1.50 | -8.4 <sup>a</sup>  | -0.8 | -4.3 | -3.3  | -5.4  | -9.6  | -5.2  | -5.4  | -6.1  | -6.3  | -6.4  | -5.6  | -6.4  | -6.7  |
| Uracil-Uracil_BP_2.00 | -3.3 <sup>a</sup>  | -1.4 | -1.7 | -1.5  | -2.4  | -4.9  | -2.4  | -2.5  | -2.7  | -2.9  | -2.9  | -2.6  | -2.9  | -3.0  |
| Water-Pyridine_0.90   | -6.4 <sup>a</sup>  | 10.8 | 2.8  | -2.1  | -1.8  | -4.8  | -0.2  | -3.5  | -4.3  | -4.4  | -4.4  | -4.9  | -5.7  | -6.0  |
| Water-Pyridine_0.95   | -6.8 <sup>a</sup>  | 8.1  | 1.3  | -2.1  | -2.8  | -5.8  | -1.4  | -3.7  | -4.4  | -4.5  | -4.5  | -4.7  | -5.5  | -5.8  |
| Water-Pyridine_1.00   | -6.8 <sup>a</sup>  | 6.0  | 0.4  | -1.6  | -3.3  | -6.3  | -2.1  | -3.7  | -4.3  | -4.4  | -4.5  | -4.4  | -5.1  | -5.3  |
| Water-Pyridine_1.05   | -6.6 <sup>a</sup>  | 4.3  | -0.1 | -1.3  | -3.6  | -6.5  | -2.6  | -3.5  | -4.1  | -4.2  | -4.2  | -4.0  | -4.7  | -4.9  |
| Water-Pyridine_1.10   | -6.3 <sup>a</sup>  | 3.0  | -0.5 | -1.2  | -3.7  | -6.4  | -2.9  | -3.3  | -3.8  | -4.0  | -4.0  | -3.7  | -4.3  | -4.5  |
| Water-Pyridine_1.25   | -4.9 <sup>a</sup>  | 0.7  | 1.3  | -1.4  | -3.3  | -5.5  | -2.9  | -2.6  | -3.0  | -3.1  | -3.1  | -2.8  | -3.3  | -3.4  |
| Water-Pyridine_1.50   | -3.0 <sup>a</sup>  | -0.6 | -1.2 | -1.1  | -2.2  | -3.9  | -2.0  | -1.7  | -1.9  | -2.0  | -2.0  | -1.8  | -2.1  | -2.2  |
| Water-Pyridine_2.00   | -1.2 <sup>a</sup>  | -0.6 | -0.6 | -0.6  | -1.0  | -2.2  | -1.0  | -0.8  | -0.9  | -0.9  | -0.9  | -0.9  | -0.9  | -1.0  |
| MeOH-Pyridine_0.90    | -6.8 <sup>a</sup>  | 12.2 | 3.8  | -1.7  | -0.3  | -3.6  | -0.0  | -2.7  | -3.8  | -4.0  | -4.0  | -4.3  | -5.6  | -6.0  |
| MeOH-Pyridine_0.95    | -7.3 <sup>a</sup>  | 9.3  | 2.0  | -2.1  | -1.5  | -4.9  | -1.2  | -3.1  | -4.1  | -4.3  | -4.3  | -4.2  | -5.4  | -5.8  |
| MeOH-Pyridine_1.00    | -7.4 <sup>a</sup>  | 6.9  | 0.9  | -1.7  | -2.3  | -5.7  | -2.0  | -3.2  | -4.1  | -4.3  | -4.3  | -4.0  | -5.1  | -5.4  |
| MeOH-Pyridine_1.05    | -7.2 <sup>a</sup>  | 5.1  | 0.2  | -1.3  | -2.8  | -6.0  | -2.6  | -3.1  | -3.9  | -4.1  | -4.1  | -3.7  | -4.7  | -5.0  |
| MeOH-Pyridine_1.10    | -6.9 <sup>a</sup>  | 3.7  | 0.2  | -1.1  | -3.0  | -6.1  | -2.9  | -2.9  | -3.7  | -3.9  | -3.9  | -3.4  | -4.3  | -4.6  |
| MeOH-Pyridine_1.25    | -5.5 <sup>a</sup>  | 1.0  | -1.1 | -1.3  | -2.9  | -5.5  | -2.9  | -2.3  | -2.9  | -3.1  | -3.1  | -2.6  | -3.3  | -3.5  |
| MeOH-Pyridine_1.50    | -3.4 <sup>a</sup>  | -0.5 | -1.2 | -1.1  | -2.0  | -3.9  | -2.1  | -1.5  | -1.8  | -2.0  | -2.0  | -1.7  | -2.0  | -2.2  |
| MeOH-Pyridine_2.00    | -1.3 <sup>a</sup>  | -0.6 | -0.6 | -0.6  | -0.9  | -2.2  | -1.0  | -0.7  | -0.8  | -0.9  | -0.9  | -0.8  | -0.9  | -1.0  |
| AcOH-AcOH_0.90        | -17.4 <sup>a</sup> | 36.0 | 10.8 | 0.1   | -8.3  | -16.5 | -5.0  | -14.8 | -16.3 | -16.3 | -16.3 | -13.2 | -14.8 | -15.4 |
| AcOH-AcOH_0.95        | -18.8 <sup>a</sup> | 29.4 | 5.1  | -6.9  | -10.3 | -18.2 | -5.9  | -14.5 | -15.9 | -16.0 | -16.0 | -12.7 | -14.2 | -14.7 |
| AcOH-AcOH_1.00        | -19.1 <sup>a</sup> | 23.8 | 0.4  | -10.8 | -11.2 | -18.7 | -6.4  | -13.6 | -15.0 | -15.0 | -15.0 | -11.8 | -13.2 | -13.7 |
| AcOH-AcOH_1.05        | -18.7 <sup>a</sup> | 19.0 | -3.1 | -11.6 | -11.2 | -16.2 | -6.7  | -12.4 | -13.7 | -13.8 | -13.8 | -10.7 | -12.1 | -12.5 |
| AcOH-AcOH_1.10        | -17.9 <sup>a</sup> | 15.1 | -5.4 | -10.3 | -10.9 | -14.1 | -6.8  | -11.2 | -12.4 | -12.4 | -12.5 | -9.6  | -11.0 | -11.3 |
| AcOH-AcOH_1.25        | -14.6 <sup>a</sup> | 6.7  | 7.1  | -5.4  | -9.0  | -12.2 | -6.6  | -7.9  | -8.9  | -9.0  | -9.0  | -7.1  | -8.2  | -8.5  |
| AcOH-AcOH_1.50        | -9.2 <sup>a</sup>  | 0.6  | -4.6 | -4.0  | -5.6  | -9.1  | -4.8  | -4.7  | -5.3  | -5.5  | -5.5  | -4.6  | -5.3  | -5.5  |
| AcOH-AcOH_2.00        | -3.6 <sup>a</sup>  | -1.1 | -1.6 | -1.7  | -2.3  | -4.8  | -2.1  | -2.1  | -2.2  | -2.4  | -2.4  | -2.0  | -2.2  | -2.4  |
| AcNH2-AcNH2_0.90      | -14.9 <sup>a</sup> | 25.8 | 2.9  | -6.1  | -10.9 | -15.7 | -6.2  | -14.0 | -15.5 | -15.7 | -15.7 | -12.7 | -14.5 | -15.0 |
| AcNH2-AcNH2_0.95      | -16.0 <sup>a</sup> | 20.1 | -2.8 | -8.6  | -12.1 | -16.5 | -7.2  | -13.6 | -15.1 | -15.2 | -15.2 | -12.3 | -14.0 | -14.5 |
| AcNH2-AcNH2_1.00      | -16.3 <sup>a</sup> | 15.4 | -6.3 | -8.3  | -12.4 | -16.7 | -7.8  | -12.8 | -14.2 | -14.3 | -14.3 | -11.7 | -13.3 | -13.6 |
| AcNH2-AcNH2_1.05      | -15.9 <sup>a</sup> | 11.5 | -8.1 | -6.7  | -12.1 | -16.4 | -8.1  | -11.8 | -13.0 | -13.2 | -13.2 | -10.9 | -12.4 | -12.7 |
| AcNH2-AcNH2_1.10      | -15.3 <sup>a</sup> | 8.4  | -8.6 | -5.4  | -11.5 | -15.8 | -8.1  | -10.8 | -11.9 | -12.1 | -12.1 | -10.1 | -11.5 | -11.8 |
| AcNH2-AcNH2_1.25      | -12.4 <sup>a</sup> | 2.3  | 7.2  | -4.4  | -9.0  | -13.4 | -7.3  | -8.1  | -9.0  | -9.2  | -9.2  | -8.1  | -9.2  | -9.4  |
| AcNH2-AcNH2_1.50      | -8.0 <sup>a</sup>  | -1.3 | -4.2 | -3.6  | -5.6  | -9.4  | -5.1  | -5.3  | -5.8  | -6.0  | -6.0  | -5.5  | -6.1  | -6.3  |
| AcNH2-AcNH2_2.00      | -3.0 <sup>a</sup>  | -1.5 | -1.7 | -1.7  | -2.4  | -4.4  | -2.2  | -2.4  | -2.5  | -2.6  | -2.6  | -2.5  | -2.6  | -2.7  |
| AcOH-Uracil_0.90      | -17.9 <sup>a</sup> | 30.9 | 7.9  | -2.7  | -9.4  | -16.3 | -7.5  | -16.4 | -18.1 | -18.2 | -18.2 | -15.2 | -17.0 | -17.7 |
| AcOH-Uracil_0.95      | -19.2 <sup>a</sup> | 24.8 | 1.8  | -8.5  | -11.3 | -17.7 | -8.3  | -16.1 | -17.7 | -17.8 | -17.9 | -14.7 | -16.4 | -16.9 |
| AcOH-Uracil_1.00      | -19.5 <sup>a</sup> | 19.7 | -2.8 | -10.9 | -12.1 | -18.2 | -8.7  | -15.3 | -16.7 | -16.9 | -16.9 | -13.7 | -15.4 | -15.8 |
| AcOH-Uracil_1.05      | -19.2 <sup>a</sup> | 15.4 | -5.9 | -10.8 | -12.1 | -16.8 | -8.9  | -14.1 | -15.4 | -15.6 | -15.6 | -12.7 | -14.2 | -14.7 |
| AcOH-Uracil_1.10      | -18.4 <sup>a</sup> | 11.8 | -7.7 | -9.3  | -11.8 | -15.7 | -8.9  | -12.8 | -14.1 | -14.3 | -14.3 | -11.6 | -13.1 | -13.5 |
| AcOH-Uracil_1.25      | -15.1 <sup>a</sup> | 4.4  | -8.2 | -5.5  | -9.8  | -13.9 | -8.2  | -9.5  | -10.5 | -10.7 | -10.8 | -9.0  | -10.1 | -10.5 |
| AcOH-Uracil_1.50      | -9.9 <sup>a</sup>  | -0.7 | -5.2 | -4.5  | -6.3  | -10.3 | -6.0  | -6.1  | -6.7  | -7.0  | -7.0  | -6.0  | -6.8  | -7.1  |
| AcOH-Uracil_2.00      | -4.1 <sup>a</sup>  | -1.7 | -2.1 | -2.2  | -2.8  | -5.6  | -2.8  | -3.0  | -3.2  | -3.3  | -3.3  | -2.9  | -3.2  | -3.3  |
| AcNH2-Uracil_0.90     | -17.7 <sup>a</sup> | 25.6 | 3.3  | -5.4  | -12.0 | -17.7 | -8.9  | -17.1 | -18.8 | -19.0 | -19.0 | -16.1 | -18.0 | -18.6 |
| AcNH2-Uracil_0.95     | -18.9 <sup>a</sup> | 20.2 | -2.5 | -9.3  | -13.5 | -18.7 | -9.7  | -16.8 | -18.4 | -18.6 | -18.7 | -15.6 | -17.5 | -18.0 |
| AcNH2-Uracil_1.00     | -19.2 <sup>a</sup> | 15.6 | -6.5 | -10.3 | -14.1 | -18.9 | -10.2 | -16.0 | -17.5 | -17.7 | -17.7 | -14.8 | -16.6 | -17.1 |

. . . continued on next page . . .



Table S10: . . . continued from previous page . . .

| Molecule                     | Ref.               | MNDO | AMI  | PM3  | PM6   | PM7   | OM1   | OM2   |       | OM3   |       | D3T   | D3    | D3T   |
|------------------------------|--------------------|------|------|------|-------|-------|-------|-------|-------|-------|-------|-------|-------|-------|
|                              |                    |      |      |      |       |       |       | D2    | D3    | D2    | D3    |       |       |       |
| AcNH2-Uracil.1.05            | -18.9 <sup>a</sup> | 11.8 | -8.8 | -9.5 | -13.9 | -18.7 | -10.3 | -14.9 | -16.3 | -16.5 | -16.6 | -16.0 | -15.6 | -16.0 |
| AcNH2-Uracil.1.10            | -18.2 <sup>a</sup> | 8.7  | -9.9 | -8.2 | -13.4 | -18.2 | -10.3 | -13.8 | -15.1 | -15.3 | -15.3 | -14.9 | -14.5 | -14.9 |
| AcNH2-Uracil.1.25            | -15.2 <sup>a</sup> | 2.3  | -9.2 | -5.9 | -11.0 | -15.8 | -9.3  | -10.7 | -11.7 | -11.9 | -12.0 | -12.0 | -11.7 | -12.0 |
| AcNH2-Uracil.1.50            | -10.2 <sup>a</sup> | -1.8 | -5.8 | -4.9 | -7.2  | -11.5 | -6.8  | -7.3  | -7.9  | -8.1  | -8.1  | -8.4  | -8.2  | -8.4  |
| AcNH2-Uracil.2.00            | -4.7 <sup>a</sup>  | -2.3 | -2.7 | -2.7 | -3.6  | -6.3  | -6.8  | -3.8  | -4.0  | -4.2  | -4.2  | -4.3  | -4.1  | -4.3  |
| Benzene-Benzene-pi-pi.0.90   | -0.2 <sup>a</sup>  | 15.1 | 7.6  | 6.3  | 1.5   | -2.8  | 2.6   | 2.3   | -2.1  | -2.5  | -2.3  | 2.6   | -2.5  | -3.3  |
| Benzene-Benzene-pi-pi.0.95   | -2.1 <sup>a</sup>  | 9.6  | 5.2  | 3.8  | 0.5   | -3.8  | 1.4   | 1.7   | -1.8  | -2.5  | -2.3  | 1.7   | -2.5  | -3.3  |
| Benzene-Benzene-pi-pi.1.00   | -2.7 <sup>a</sup>  | 6.1  | 3.4  | 2.3  | 0.1   | -4.3  | 0.9   | 1.3   | -1.4  | -2.3  | -2.1  | 1.2   | -2.2  | -3.1  |
| Benzene-Benzene-pi-pi.1.05   | -2.8 <sup>a</sup>  | 3.9  | 2.2  | 1.4  | 0.0   | -4.4  | 0.6   | 1.1   | -1.0  | -2.0  | -1.8  | 0.9   | -1.7  | -2.5  |
| Benzene-Benzene-pi-pi.1.10   | -2.6 <sup>a</sup>  | 2.4  | 1.4  | 0.8  | 0.0   | -4.3  | 0.4   | 1.0   | -0.7  | -1.6  | -1.5  | 0.7   | -1.4  | -2.2  |
| Benzene-Benzene-pi-pi.1.25   | -1.5 <sup>a</sup>  | 0.6  | 0.4  | 0.2  | 0.1   | -3.3  | 0.2   | 0.6   | -0.3  | -0.9  | -0.8  | 0.5   | -0.6  | -1.1  |
| Benzene-Benzene-pi-pi.1.50   | -0.5 <sup>a</sup>  | 0.0  | 0.1  | 0.0  | 0.1   | -1.2  | 0.1   | 0.3   | -0.0  | -0.3  | -0.2  | 0.2   | -0.2  | -0.4  |
| Benzene-Benzene-pi-pi.2.00   | -0.1 <sup>a</sup>  | 0.0  | 0.0  | -0.0 | 0.0   | -0.2  | 0.0   | 0.1   | 0.0   | -0.0  | 0.0   | 0.1   | -0.0  | -0.1  |
| Pyridine-Pyridine-pi-pi.0.90 | -1.3 <sup>a</sup>  | 17.3 | 7.0  | 7.7  | 0.5   | -3.4  | 1.6   | 0.4   | -4.1  | -4.4  | -4.3  | 1.1   | -4.1  | -5.0  |
| Pyridine-Pyridine-pi-pi.0.95 | -3.2 <sup>a</sup>  | 11.1 | 4.7  | 4.6  | -0.6  | -4.6  | 0.5   | -0.0  | -3.7  | -4.2  | -4.1  | 0.3   | -4.1  | -4.9  |
| Pyridine-Pyridine-pi-pi.1.00 | -3.8 <sup>a</sup>  | 7.1  | 3.1  | 2.7  | -1.0  | -5.2  | -0.1  | -0.1  | -3.1  | -3.8  | -3.7  | -0.1  | -3.6  | -4.4  |
| Pyridine-Pyridine-pi-pi.1.05 | -3.9 <sup>a</sup>  | 4.5  | 1.9  | 1.5  | -1.0  | -5.3  | -0.3  | -0.2  | -2.5  | -3.4  | -3.2  | -0.2  | -3.1  | -4.0  |
| Pyridine-Pyridine-pi-pi.1.10 | -3.6 <sup>a</sup>  | 2.8  | 1.1  | 0.8  | -0.9  | -5.2  | -0.4  | -0.2  | -2.1  | -2.9  | -2.8  | -0.2  | -2.5  | -3.4  |
| Pyridine-Pyridine-pi-pi.1.25 | -2.4 <sup>a</sup>  | 0.6  | 0.1  | -0.0 | -0.6  | -4.2  | -0.3  | -0.2  | -1.2  | -1.9  | -1.7  | -0.2  | -1.4  | -2.1  |
| Pyridine-Pyridine-pi-pi.1.50 | -1.0 <sup>a</sup>  | -0.1 | -0.2 | -0.2 | -0.3  | -1.7  | -0.2  | -0.1  | -0.5  | -0.8  | -0.7  | -0.2  | -0.6  | -0.9  |
| Pyridine-Pyridine-pi-pi.2.00 | -0.2 <sup>a</sup>  | -0.1 | -0.1 | -0.1 | -0.1  | -0.4  | -0.1  | -0.1  | -0.2  | -0.2  | -0.2  | -0.1  | -0.2  | -0.2  |
| Uracil-Uracil_pi-pi.0.90     | -7.9 <sup>a</sup>  | 29.7 | 2.8  | 15.0 | -1.2  | -5.6  | -0.7  | -4.6  | -10.5 | -10.6 | -10.4 | -2.9  | -9.9  | -10.8 |
| Uracil-Uracil_pi-pi.0.95     | -9.5 <sup>a</sup>  | 20.1 | 0.8  | 9.4  | -3.5  | -7.6  | -2.2  | -4.6  | -9.7  | -10.1 | -9.9  | -3.8  | -9.9  | -10.7 |
| Uracil-Uracil_pi-pi.1.00     | -9.8 <sup>a</sup>  | 13.5 | 0.1  | 5.8  | -4.5  | -8.6  | -2.7  | -4.3  | -8.6  | -9.3  | -9.1  | -3.9  | -9.2  | -10.0 |
| Uracil-Uracil_pi-pi.1.05     | -9.4 <sup>a</sup>  | 8.9  | -0.1 | 3.5  | -4.7  | -8.9  | -2.8  | -4.0  | -7.5  | -8.4  | -8.2  | -3.8  | -8.2  | -9.1  |
| Uracil-Uracil_pi-pi.1.10     | -8.7 <sup>a</sup>  | 5.8  | -0.3 | 2.0  | -4.5  | -8.9  | -2.7  | -3.6  | -6.5  | -7.5  | -7.3  | -3.5  | -7.2  | -8.0  |
| Uracil-Uracil_pi-pi.1.25     | -6.1 <sup>a</sup>  | 1.2  | -0.8 | -0.0 | -3.3  | -7.7  | -2.1  | -2.6  | -4.3  | -5.3  | -5.1  | -2.7  | -4.8  | -5.5  |
| Uracil-Uracil_pi-pi.1.50     | -3.1 <sup>a</sup>  | -0.4 | -1.0 | -0.6 | -1.9  | -4.6  | -1.3  | -1.6  | -2.4  | -2.9  | -2.8  | -1.7  | -2.6  | -3.1  |
| Uracil-Uracil_pi-pi.2.00     | -1.0 <sup>a</sup>  | -0.4 | -0.5 | -0.4 | -0.8  | -1.4  | -0.6  | -0.7  | -0.9  | -1.1  | -0.9  | -0.8  | -1.0  | -1.0  |
| Benzene-Pyridine-pi-pi.0.90  | -0.7 <sup>a</sup>  | 16.8 | 7.4  | 7.1  | 1.0   | -3.1  | 2.1   | 1.3   | -3.2  | -3.5  | -3.4  | 1.8   | -3.4  | -4.2  |
| Benzene-Pyridine-pi-pi.0.95  | -2.7 <sup>a</sup>  | 10.6 | 5.0  | 4.2  | -0.1  | -4.3  | 0.9   | 0.8   | -2.8  | -3.4  | -3.3  | 0.9   | -3.4  | -4.2  |
| Benzene-Pyridine-pi-pi.1.00  | -3.4 <sup>a</sup>  | 6.6  | 3.2  | 2.4  | -0.5  | -4.8  | 0.3   | 0.5   | -2.3  | -3.1  | -3.0  | 0.5   | -3.0  | -3.8  |
| Benzene-Pyridine-pi-pi.1.05  | -3.4 <sup>a</sup>  | 4.2  | 2.0  | 1.4  | -0.6  | -4.9  | 0.1   | 0.4   | -1.8  | -2.7  | -2.6  | 0.3   | -2.5  | -3.4  |
| Benzene-Pyridine-pi-pi.1.10  | -3.1 <sup>a</sup>  | 2.6  | 1.2  | 0.8  | -0.5  | -4.8  | -0.0  | 0.3   | -1.4  | -2.3  | -2.2  | 0.2   | -2.0  | -2.7  |
| Benzene-Pyridine-pi-pi.1.25  | -2.0 <sup>a</sup>  | 0.6  | 0.2  | 0.0  | -0.3  | -3.7  | -0.1  | 0.2   | -0.7  | -1.4  | -1.3  | 0.1   | -1.1  | -1.5  |
| Benzene-Pyridine-pi-pi.1.50  | -0.7 <sup>a</sup>  | -0.0 | -0.1 | -0.1 | -0.1  | -1.4  | -0.1  | 0.1   | -0.3  | -0.6  | -0.5  | 0.0   | -0.4  | -0.5  |
| Benzene-Pyridine-pi-pi.2.00  | -0.1 <sup>a</sup>  | -0.0 | -0.0 | -0.0 | -0.0  | -0.3  | -0.0  | -0.0  | -0.1  | -0.1  | -0.1  | -0.0  | -0.1  | -0.1  |
| Benzene-Uracil_pi-pi.0.90    | -3.5 <sup>a</sup>  | 23.0 | 8.1  | 9.9  | 0.4   | -3.2  | 1.3   | -1.1  | -6.4  | -6.6  | -6.4  | 0.0   | -6.1  | -7.0  |
| Benzene-Uracil_pi-pi.0.95    | -5.2 <sup>a</sup>  | 15.4 | 5.8  | 6.2  | -1.1  | -4.7  | 0.1   | -1.2  | -5.6  | -6.1  | -6.0  | -0.7  | -5.9  | -6.8  |
| Benzene-Uracil_pi-pi.1.00    | -5.7 <sup>a</sup>  | 10.2 | 4.1  | 3.8  | -1.6  | -5.4  | -0.4  | -1.1  | -4.8  | -5.5  | -5.3  | -0.9  | -5.3  | -6.2  |
| Benzene-Uracil_pi-pi.1.05    | -5.5 <sup>a</sup>  | 6.8  | 2.8  | 2.2  | -1.7  | -5.7  | -0.6  | -1.0  | -3.9  | -4.8  | -4.6  | -0.9  | -4.5  | -5.3  |
| Benzene-Uracil_pi-pi.1.10    | -5.1 <sup>a</sup>  | 4.5  | 1.9  | 1.3  | -1.5  | -5.8  | -0.6  | -0.8  | -3.2  | -4.2  | -4.0  | -0.8  | -3.8  | -4.7  |
| Benzene-Uracil_pi-pi.1.25    | -3.3 <sup>a</sup>  | 1.2  | 0.4  | 0.1  | -0.9  | -5.0  | -0.5  | -0.5  | -1.8  | -2.6  | -2.5  | -0.5  | -2.2  | -2.9  |
| Benzene-Uracil_pi-pi.1.50    | -1.4 <sup>a</sup>  | 0.1  | -0.1 | -0.2 | -0.4  | -2.4  | -0.2  | -0.2  | -0.7  | -1.2  | -1.0  | -0.2  | -0.9  | -1.1  |
| Benzene-Uracil_pi-pi.2.00    | -0.3 <sup>a</sup>  | -0.0 | -0.0 | -0.1 | -0.1  | -0.5  | -0.0  | 0.0   | -0.1  | -0.2  | -0.1  | -0.0  | -0.2  | -0.3  |

. . . continued on next page . . .

Table S10: ... continued from previous page ...

| Molecule                   | Ref.              | MNDO | AMI  | PM3  | PM6  | PM7  | OM1  | OM2  |      | OM3  |      | D3T  | OM3  | D3   | D3T  |
|----------------------------|-------------------|------|------|------|------|------|------|------|------|------|------|------|------|------|------|
|                            |                   |      |      |      |      |      |      | D2   | D3   | D2   | D3   |      |      |      |      |
| Pyridine-Uracil_pi-pi.0.90 | -3.7 <sup>a</sup> | 24.8 | 6.4  | 11.8 | -0.0 | -3.6 | 0.5  | -2.3 | -7.8 | -7.8 | -1.0 | -7.7 | -7.2 | -8.1 | -8.0 |
| Pyridine-Uracil_pi-pi.0.95 | -6.2 <sup>a</sup> | 15.2 | 4.1  | 6.6  | -2.4 | -5.8 | -1.2 | -2.6 | -7.0 | -7.4 | -1.9 | -7.3 | -7.2 | -8.1 | -7.9 |
| Pyridine-Uracil_pi-pi.1.00 | -6.8 <sup>a</sup> | 9.2  | 2.5  | 3.4  | -3.2 | -6.8 | -1.7 | -2.4 | -6.0 | -6.7 | -2.2 | -6.5 | -6.5 | -7.4 | -7.2 |
| Pyridine-Uracil_pi-pi.1.05 | -6.6 <sup>a</sup> | 5.4  | 1.4  | 1.5  | -3.3 | -7.1 | -1.9 | -2.2 | -5.1 | -5.9 | -2.1 | -5.7 | -5.6 | -6.5 | -6.3 |
| Pyridine-Uracil_pi-pi.1.10 | -6.0 <sup>a</sup> | 3.0  | 0.6  | 0.4  | -3.0 | -7.1 | -1.8 | -2.0 | -4.2 | -5.1 | -2.0 | -5.0 | -4.7 | -5.6 | -5.5 |
| Pyridine-Uracil_pi-pi.1.25 | -3.9 <sup>a</sup> | 0.1  | -0.5 | -0.7 | -2.1 | -5.7 | -1.5 | -1.4 | -2.6 | -3.4 | -1.5 | -3.2 | -2.9 | -3.6 | -3.4 |
| Pyridine-Uracil_pi-pi.1.50 | -1.8 <sup>a</sup> | -0.6 | -0.7 | -0.7 | -1.1 | -2.7 | -0.9 | -0.9 | -1.3 | -1.7 | -0.9 | -1.6 | -1.5 | -1.8 | -1.7 |
| Pyridine-Uracil_pi-pi.2.00 | -0.5 <sup>a</sup> | -0.3 | -0.3 | -0.4 | -0.5 | -0.6 | -0.4 | -0.4 | -0.5 | -0.6 | -0.4 | -0.5 | -0.5 | -0.6 | -0.5 |
| Benzene-Ethene.0.90        | -0.3 <sup>a</sup> | 8.7  | 4.0  | 3.2  | 0.8  | -1.2 | 1.4  | 1.6  | -0.9 | -1.1 | 1.6  | -1.1 | -1.2 | -1.8 | -1.8 |
| Benzene-Ethene.0.95        | -1.1 <sup>a</sup> | 5.5  | 2.8  | 1.9  | 0.3  | -1.7 | 0.8  | 1.3  | -0.7 | -1.1 | 1.1  | -1.0 | -1.2 | -1.8 | -1.7 |
| Benzene-Ethene.1.00        | -1.4 <sup>a</sup> | 3.5  | 1.9  | 1.2  | 0.2  | -2.0 | 0.5  | 1.1  | -0.4 | -1.0 | 0.9  | -0.9 | -1.0 | -1.6 | -1.5 |
| Benzene-Ethene.1.05        | -1.4 <sup>a</sup> | 2.2  | 1.3  | 0.7  | 0.1  | -2.2 | 0.4  | 0.9  | -0.2 | -0.8 | 0.7  | -0.7 | -0.7 | -1.3 | -1.2 |
| Benzene-Ethene.1.10        | -1.3 <sup>a</sup> | 1.4  | 0.8  | 0.4  | 0.1  | -2.3 | 0.3  | 0.8  | -0.1 | -0.6 | 0.6  | -0.6 | -0.5 | -1.0 | -1.0 |
| Benzene-Ethene.1.25        | -0.7 <sup>a</sup> | 0.3  | 0.3  | 0.1  | 0.1  | -1.8 | 0.2  | 0.6  | 0.1  | -0.3 | 0.4  | -0.2 | -0.2 | -0.5 | -0.4 |
| Benzene-Ethene.1.50        | -0.2 <sup>a</sup> | 0.0  | 0.1  | 0.0  | 0.1  | -0.8 | 0.1  | 0.3  | 0.1  | -0.3 | 0.2  | 0.0  | 0.0  | -0.1 | -0.1 |
| Benzene-Ethene.2.00        | 0.0 <sup>a</sup>  | 0.0  | 0.0  | 0.0  | 0.0  | -0.1 | 0.0  | 0.1  | 0.1  | 0.0  | 0.1  | 0.1  | 0.0  | 0.0  | 0.0  |
| Uracil-Ethene.0.90         | -2.6 <sup>a</sup> | 12.9 | 2.9  | 4.3  | -0.4 | -1.8 | 0.9  | -0.9 | -3.6 | -3.7 | -0.2 | -3.6 | -3.4 | -3.9 | -3.8 |
| Uracil-Ethene.0.95         | -3.2 <sup>a</sup> | 8.7  | 2.1  | 2.6  | -0.9 | -2.4 | 0.1  | -0.9 | -3.2 | -3.5 | -0.6 | -3.4 | -3.3 | -3.8 | -3.7 |
| Uracil-Ethene.1.00         | -3.4 <sup>a</sup> | 5.9  | 1.5  | 1.6  | -1.0 | -2.8 | -0.2 | -0.8 | -2.7 | -3.2 | -0.7 | -3.1 | -3.0 | -3.5 | -3.4 |
| Uracil-Ethene.1.05         | -3.2 <sup>a</sup> | 3.9  | 1.1  | 1.9  | -1.0 | -2.9 | -0.4 | -0.8 | -2.3 | -2.8 | -0.7 | -2.7 | -2.6 | -3.1 | -3.0 |
| Uracil-Ethene.1.10         | -3.0 <sup>a</sup> | 2.6  | 0.7  | 0.5  | -0.9 | -2.9 | -0.4 | -0.7 | -2.0 | -2.5 | -0.7 | -2.4 | -2.2 | -2.7 | -2.7 |
| Uracil-Ethene.1.25         | -2.0 <sup>a</sup> | 0.7  | 0.1  | -0.0 | -0.6 | -2.6 | -0.4 | -0.5 | -1.2 | -1.7 | -0.5 | -1.6 | -1.4 | -1.8 | -1.7 |
| Uracil-Ethene.1.50         | -0.9 <sup>a</sup> | 0.0  | -0.1 | -0.1 | -0.3 | -1.4 | -0.2 | -0.3 | -0.6 | -0.8 | -0.3 | -0.8 | -0.7 | -0.9 | -0.8 |
| Uracil-Ethene.2.00         | -0.3 <sup>a</sup> | -0.0 | -0.1 | -0.1 | -0.1 | -0.4 | -0.1 | -0.1 | -0.2 | -0.3 | -0.1 | -0.2 | -0.2 | -0.3 | -0.2 |
| Uracil-Ethyne.0.90         | -2.8 <sup>a</sup> | 10.7 | 2.6  | 3.9  | -0.2 | -1.2 | -0.3 | -2.0 | -4.3 | -4.4 | -1.3 | -4.4 | -4.0 | -4.5 | -4.4 |
| Uracil-Ethyne.0.95         | -3.6 <sup>a</sup> | 7.0  | 1.7  | 2.3  | -0.9 | -2.0 | -0.9 | -1.9 | -3.8 | -4.1 | -1.5 | -4.0 | -3.8 | -4.3 | -4.3 |
| Uracil-Ethyne.1.00         | -3.7 <sup>a</sup> | 4.6  | 1.2  | 1.2  | -1.1 | -2.4 | -1.0 | -1.7 | -3.3 | -3.7 | -1.5 | -3.6 | -3.4 | -3.9 | -3.9 |
| Uracil-Ethyne.1.05         | -3.6 <sup>a</sup> | 3.0  | 0.7  | 0.6  | -1.1 | -2.5 | -1.0 | -1.5 | -2.8 | -3.2 | -1.4 | -3.2 | -3.0 | -3.5 | -3.4 |
| Uracil-Ethyne.1.10         | -3.3 <sup>a</sup> | 1.9  | 0.4  | 0.2  | -1.0 | -2.6 | -1.0 | -1.3 | -2.4 | -2.8 | -1.3 | -2.8 | -2.6 | -3.0 | -3.0 |
| Uracil-Ethyne.1.25         | -2.2 <sup>a</sup> | 0.3  | -0.1 | -0.3 | -0.7 | -2.3 | -0.7 | -0.9 | -1.5 | -1.9 | -0.9 | -1.8 | -1.6 | -2.0 | -1.9 |
| Uracil-Ethyne.1.50         | -1.0 <sup>a</sup> | -0.1 | -0.2 | -0.3 | -0.3 | -1.3 | -0.4 | -0.5 | -0.7 | -1.0 | -0.5 | -0.9 | -0.8 | -1.0 | -0.9 |
| Uracil-Ethyne.2.00         | -0.3 <sup>a</sup> | -0.1 | -0.1 | -0.1 | -0.1 | -0.3 | -0.1 | -0.2 | -0.2 | -0.3 | -0.2 | -0.3 | -0.2 | -0.3 | -0.3 |
| Pyridine-Ethene.0.90       | -0.9 <sup>a</sup> | 9.4  | 3.4  | 3.5  | 0.3  | -1.4 | 1.0  | 0.8  | -1.6 | -1.8 | 1.0  | -1.8 | -1.9 | -2.4 | -2.4 |
| Pyridine-Ethene.0.95       | -1.6 <sup>a</sup> | 6.2  | 2.5  | 2.2  | -0.1 | -2.0 | 0.4  | 0.6  | -1.4 | -1.7 | 0.6  | -1.7 | -1.8 | -2.3 | -2.3 |
| Pyridine-Ethene.1.00       | -1.9 <sup>a</sup> | 4.1  | 1.8  | 1.4  | -0.2 | -2.2 | 0.2  | 0.5  | -1.0 | -1.5 | 0.4  | -1.5 | -1.5 | -2.1 | -2.0 |
| Pyridine-Ethene.1.05       | -1.8 <sup>a</sup> | 2.7  | 1.2  | 0.8  | -0.2 | -2.4 | 0.1  | 0.5  | -0.8 | -1.3 | 0.3  | -1.2 | -1.3 | -1.8 | -1.7 |
| Pyridine-Ethene.1.10       | -1.7 <sup>a</sup> | 1.7  | 0.8  | 0.5  | -0.2 | -2.4 | 0.0  | 0.4  | -0.6 | -1.1 | 0.2  | -1.0 | -1.0 | -1.5 | -1.5 |
| Pyridine-Ethene.1.25       | -1.0 <sup>a</sup> | 0.4  | 0.2  | 0.1  | -0.1 | -2.1 | 0.0  | 0.3  | -0.2 | -0.6 | 0.2  | -0.6 | -0.5 | -0.8 | -0.8 |
| Pyridine-Ethene.1.50       | -0.4 <sup>a</sup> | 0.0  | 0.0  | -0.0 | -0.0 | -1.0 | 0.0  | 0.2  | -0.0 | -0.2 | 0.1  | -0.2 | -0.2 | -0.3 | -0.3 |
| Pyridine-Ethene.2.00       | -0.0 <sup>a</sup> | -0.0 | 0.0  | -0.0 | 0.0  | -0.1 | 0.0  | 0.1  | 0.0  | -0.0 | 0.0  | 0.0  | -0.0 | -0.1 | -0.0 |
| Pentane-Pentane.0.90       | -2.9 <sup>a</sup> | 21.0 | 0.4  | -2.3 | -0.0 | -3.5 | 4.8  | 0.7  | -4.1 | -4.0 | 3.5  | -3.8 | -2.9 | -2.5 | -2.3 |
| Pentane-Pentane.0.95       | -3.6 <sup>a</sup> | 14.6 | -0.2 | -3.2 | -0.5 | -4.0 | 2.6  | 0.0  | -4.0 | -4.2 | 1.9  | -4.1 | -3.3 | -3.3 | -3.2 |
| Pentane-Pentane.1.00       | -3.8 <sup>a</sup> | 10.2 | -0.3 | -3.4 | -0.6 | -4.1 | 1.3  | -0.2 | -3.5 | -4.0 | 1.0  | -3.8 | -3.1 | -3.5 | -3.4 |
| Pentane-Pentane.1.05       | -3.6 <sup>a</sup> | 7.1  | -0.2 | -3.0 | -0.6 | -3.9 | 0.6  | -0.2 | -2.9 | -3.6 | 0.6  | -3.4 | -2.8 | -3.4 | -3.2 |
| Pentane-Pentane.1.10       | -3.3 <sup>a</sup> | 5.0  | -0.1 | -2.4 | -0.6 | -3.7 | 0.3  | -0.2 | -2.4 | -3.1 | 0.3  | -3.0 | -2.4 | -3.1 | -3.0 |

... continued on next page ...

Table S10: ... continued from previous page ...

| Molecule                       | Ref.              | MNDO | AMI  | PM3  | PM6  | PM7  | OM1  | OM2  |      | OM3  |      | D3T  |
|--------------------------------|-------------------|------|------|------|------|------|------|------|------|------|------|------|
|                                |                   |      |      |      |      |      |      | D2   | D3   | D2   | D3   |      |
| Pentane-Pentane.1.25           | -2.2 <sup>a</sup> | 1.8  | 0.1  | -1.1 | -0.2 | -2.9 | 0.0  | -0.0 | -1.3 | -2.0 | -1.9 | -2.0 |
| Pentane-Pentane.1.50           | -1.1 <sup>a</sup> | 0.3  | 0.1  | -0.3 | -0.1 | -1.7 | 0.0  | -0.0 | -0.6 | -1.0 | -0.9 | -1.0 |
| Pentane-Pentane.2.00           | -0.3 <sup>a</sup> | 0.0  | 0.0  | -0.0 | -0.0 | -0.5 | 0.0  | 0.0  | -0.2 | -0.3 | -0.3 | -0.3 |
| Neopentane-Pentane.0.90        | -1.9 <sup>a</sup> | 14.1 | -0.5 | -2.5 | -0.4 | -3.4 | 3.6  | 0.1  | -3.3 | -3.5 | -3.3 | -2.1 |
| Neopentane-Pentane.0.95        | -2.5 <sup>a</sup> | 9.4  | -0.8 | -3.1 | -0.7 | -3.6 | 1.8  | -0.4 | -3.1 | -3.5 | -3.3 | -2.6 |
| Neopentane-Pentane.1.00        | -2.6 <sup>a</sup> | 6.3  | -0.7 | -2.9 | -0.7 | -3.4 | 0.8  | -0.4 | -2.6 | -3.1 | -3.0 | -2.6 |
| Neopentane-Pentane.1.05        | -2.5 <sup>a</sup> | 4.3  | -0.5 | -2.5 | -0.6 | -3.2 | 0.4  | -0.4 | -2.1 | -2.7 | -2.6 | -2.4 |
| Neopentane-Pentane.1.10        | -2.3 <sup>a</sup> | 2.9  | -0.3 | -1.9 | -0.5 | -2.9 | 0.1  | -0.3 | -1.7 | -2.3 | -2.2 | -2.1 |
| Neopentane-Pentane.1.25        | -1.5 <sup>a</sup> | 1.0  | 0.0  | -0.8 | -0.2 | -2.0 | -0.0 | -0.1 | -0.9 | -1.4 | -1.3 | -1.4 |
| Neopentane-Pentane.1.50        | -0.7 <sup>a</sup> | 0.2  | 0.0  | -0.2 | -0.1 | -1.1 | -0.0 | -0.0 | -0.4 | -0.7 | -0.6 | -0.7 |
| Neopentane-Pentane.2.00        | -0.2 <sup>a</sup> | 0.0  | 0.0  | -0.0 | -0.0 | -0.4 | -0.0 | -0.0 | -0.1 | -0.2 | -0.2 | -0.2 |
| Neopentane-Neopentane.0.90     | -1.5 <sup>a</sup> | 7.3  | -0.8 | -3.0 | -0.7 | -3.1 | 1.6  | -0.8 | -3.0 | -3.4 | -3.3 | -2.7 |
| Neopentane-Neopentane.0.95     | -1.7 <sup>a</sup> | 5.0  | -0.8 | -2.9 | -0.6 | -2.9 | 0.8  | -0.7 | -2.4 | -2.9 | -2.8 | -2.4 |
| Neopentane-Neopentane.1.00     | -1.8 <sup>a</sup> | 3.4  | -0.7 | -2.5 | -0.5 | -2.7 | 0.4  | -0.5 | -1.9 | -2.4 | -2.4 | -2.1 |
| Neopentane-Neopentane.1.05     | -1.7 <sup>a</sup> | 2.4  | -0.5 | -2.0 | -0.4 | -2.4 | 0.2  | -0.3 | -1.5 | -2.0 | -2.0 | -1.8 |
| Neopentane-Neopentane.1.10     | -1.5 <sup>a</sup> | 1.6  | -0.4 | -1.5 | -0.4 | -2.2 | 0.1  | -0.2 | -1.2 | -1.7 | -1.6 | -1.6 |
| Neopentane-Neopentane.1.25     | -1.0 <sup>a</sup> | 0.6  | -0.1 | -0.6 | -0.2 | -1.5 | -0.0 | -0.1 | -0.6 | -1.0 | -1.0 | -1.0 |
| Neopentane-Neopentane.1.50     | -0.5 <sup>a</sup> | 0.1  | 0.0  | -0.1 | -0.0 | -0.8 | -0.0 | -0.0 | -0.3 | -0.5 | -0.5 | -0.5 |
| Neopentane-Neopentane.2.00     | -0.1 <sup>a</sup> | 0.0  | 0.0  | -0.0 | -0.0 | -0.3 | -0.0 | -0.0 | -0.1 | -0.1 | -0.1 | -0.1 |
| Cyclopentane-Neopentane.0.90   | -1.6 <sup>a</sup> | 14.2 | -0.4 | -2.7 | -0.6 | -3.4 | 3.6  | -0.2 | -3.5 | -3.6 | -3.5 | -2.3 |
| Cyclopentane-Neopentane.0.95   | -2.2 <sup>a</sup> | 9.5  | -0.7 | -2.9 | -0.7 | -3.5 | 1.9  | -0.6 | -3.3 | -3.6 | -3.5 | -2.7 |
| Cyclopentane-Neopentane.1.00   | -2.4 <sup>a</sup> | 6.4  | -0.7 | -2.9 | -0.7 | -3.3 | 0.9  | -0.6 | -2.7 | -3.2 | -3.1 | -2.6 |
| Cyclopentane-Neopentane.1.05   | -2.3 <sup>a</sup> | 4.4  | -0.6 | -2.5 | -0.6 | -3.1 | 0.4  | -0.5 | -2.2 | -2.8 | -2.7 | -2.4 |
| Cyclopentane-Neopentane.1.10   | -2.1 <sup>a</sup> | 3.1  | -0.4 | -2.1 | -0.5 | -2.8 | 0.2  | -0.4 | -1.8 | -2.3 | -2.2 | -2.1 |
| Cyclopentane-Neopentane.1.25   | -1.5 <sup>a</sup> | 1.0  | -0.1 | -0.9 | -0.3 | -2.0 | -0.0 | -0.1 | -0.9 | -1.4 | -1.4 | -1.4 |
| Cyclopentane-Neopentane.1.50   | -0.7 <sup>a</sup> | 0.2  | 0.0  | -0.2 | -0.1 | -1.1 | -0.0 | -0.0 | -0.4 | -0.7 | -0.6 | -0.7 |
| Cyclopentane-Neopentane.2.00   | -0.2 <sup>a</sup> | 0.0  | 0.0  | -0.0 | -0.0 | -0.4 | -0.0 | -0.0 | -0.1 | -0.2 | -0.2 | -0.2 |
| Cyclopentane-Cyclopentane.0.90 | -2.2 <sup>a</sup> | 16.0 | 0.2  | -2.2 | 0.0  | -3.0 | 4.3  | 0.2  | -3.5 | -3.5 | -3.4 | -2.1 |
| Cyclopentane-Cyclopentane.0.95 | -2.8 <sup>a</sup> | 11.4 | -0.3 | -2.8 | -0.3 | -3.4 | 2.4  | -0.3 | -3.4 | -3.6 | -3.5 | -2.6 |
| Cyclopentane-Cyclopentane.1.00 | -3.0 <sup>a</sup> | 7.8  | -0.5 | -3.0 | -0.4 | -3.4 | 1.2  | -0.4 | -2.9 | -3.3 | -3.2 | -2.7 |
| Cyclopentane-Cyclopentane.1.05 | -2.9 <sup>a</sup> | 5.3  | -0.5 | -2.7 | -0.4 | -3.3 | 0.6  | -0.3 | -2.4 | -2.9 | -2.8 | -2.5 |
| Cyclopentane-Cyclopentane.1.10 | -2.6 <sup>a</sup> | 3.6  | -0.3 | -2.2 | -0.4 | -3.0 | 0.3  | -0.2 | -1.9 | -2.5 | -2.3 | -2.3 |
| Cyclopentane-Cyclopentane.1.25 | -1.7 <sup>a</sup> | 1.2  | -0.0 | -0.9 | -0.2 | -2.2 | 0.0  | -0.0 | -1.0 | -1.5 | -1.4 | -1.5 |
| Cyclopentane-Cyclopentane.1.50 | -0.8 <sup>a</sup> | 0.2  | 0.0  | -0.2 | -0.0 | -1.2 | 0.0  | -0.0 | -0.4 | -0.7 | -0.7 | -0.7 |
| Cyclopentane-Cyclopentane.2.00 | -0.2 <sup>a</sup> | 0.0  | -0.0 | -0.0 | -0.0 | -0.4 | 0.0  | 0.0  | -0.1 | -0.2 | -0.2 | -0.2 |
| Benzene-Cyclopentane.0.90      | -2.2 <sup>a</sup> | 16.7 | 2.4  | 0.5  | 0.4  | -3.8 | 3.5  | 1.3  | -2.9 | -3.0 | -2.8 | -2.5 |
| Benzene-Cyclopentane.0.95      | -3.2 <sup>a</sup> | 11.3 | 1.6  | -0.3 | -0.4 | -4.3 | 1.8  | 0.6  | -2.8 | -3.2 | -3.0 | -2.6 |
| Benzene-Cyclopentane.1.00      | -3.6 <sup>a</sup> | 7.6  | 1.3  | -0.4 | -0.5 | -4.2 | 0.9  | 0.3  | -2.4 | -3.0 | -2.9 | -3.0 |
| Benzene-Cyclopentane.1.05      | -3.5 <sup>a</sup> | 5.1  | 1.1  | -0.4 | -0.5 | -4.0 | 0.5  | -0.2 | -2.0 | -2.7 | -2.5 | -2.8 |
| Benzene-Cyclopentane.1.10      | -3.2 <sup>a</sup> | 3.4  | 0.9  | -0.4 | -0.3 | -3.7 | 0.2  | 0.1  | -1.6 | -2.3 | -2.2 | -2.4 |
| Benzene-Cyclopentane.1.25      | -2.1 <sup>a</sup> | 1.0  | 0.3  | -0.2 | -0.1 | -2.7 | 0.0  | 0.1  | -0.9 | -1.5 | -1.4 | -1.5 |
| Benzene-Cyclopentane.1.50      | -0.9 <sup>a</sup> | 0.1  | 0.0  | -0.1 | -0.0 | -1.4 | 0.0  | 0.0  | -0.4 | -0.7 | -0.6 | -0.6 |
| Benzene-Cyclopentane.2.00      | -0.2 <sup>a</sup> | -0.0 | -0.0 | -0.0 | -0.0 | -0.3 | 0.0  | 0.0  | -0.1 | -0.2 | -0.1 | -0.2 |
| Benzene-Neopentane.0.90        | -1.9 <sup>a</sup> | 11.8 | 0.9  | -0.6 | -0.4 | -4.1 | 2.4  | 0.4  | -2.7 | -3.1 | -3.0 | -2.6 |
| Benzene-Neopentane.0.95        | -2.7 <sup>a</sup> | 7.8  | 0.7  | -0.8 | -0.8 | -4.2 | 1.1  | -0.0 | -2.5 | -3.1 | -3.0 | -2.9 |

... continued on next page ...

Table S10: ... continued from previous page ...

| Molecule                 | Ref.              | MNDO | AMI  | PM3  | PM6  | PM7  | OM2  |      | OM3  |      | D3T  |      |      |      |
|--------------------------|-------------------|------|------|------|------|------|------|------|------|------|------|------|------|------|
|                          |                   |      |      |      |      |      | D2   | D3   | D2   | D3   |      |      |      |      |
| Benzene-Neopentane.1.00  | -2.9 <sup>a</sup> | 5.2  | 0.6  | -0.7 | -0.7 | -3.9 | 0.5  | -0.1 | -2.2 | -2.8 | -2.7 | -2.9 | -2.7 |      |
| Benzene-Neopentane.1.05  | -2.8 <sup>a</sup> | 3.4  | 0.6  | -0.5 | -0.6 | -3.6 | 0.2  | -0.2 | -1.8 | -2.5 | -2.4 | 0.1  | -1.9 | -2.6 |
| Benzene-Neopentane.1.10  | -2.6 <sup>a</sup> | 2.3  | 0.5  | -0.4 | -0.4 | -3.2 | 0.1  | -0.2 | -1.5 | -2.2 | -2.0 | -0.0 | -1.6 | -2.3 |
| Benzene-Neopentane.1.25  | -1.7 <sup>a</sup> | 0.7  | 0.2  | -0.2 | -0.2 | -2.2 | -0.0 | -0.1 | -0.9 | -1.4 | -1.3 | -0.1 | -1.0 | -1.3 |
| Benzene-Neopentane.1.50  | -0.8 <sup>a</sup> | 0.1  | -0.0 | -0.1 | -0.1 | -1.1 | -0.0 | -0.1 | -0.4 | -0.7 | -0.6 | -0.0 | -0.4 | -0.6 |
| Benzene-Neopentane.2.00  | -0.2 <sup>a</sup> | -0.0 | -0.0 | -0.0 | -0.0 | -0.3 | -0.0 | -0.0 | -0.1 | -0.2 | -0.1 | -0.0 | -0.1 | -0.1 |
| Uracil-Pentane.0.90      | -3.8 <sup>a</sup> | 26.5 | 3.0  | 5.4  | -0.9 | -4.2 | 3.5  | 0.2  | -4.9 | -4.9 | -4.7 | 1.6  | -4.8 | -4.9 |
| Uracil-Pentane.0.95      | -4.7 <sup>a</sup> | 18.6 | 1.9  | 3.1  | -1.7 | -5.0 | 1.6  | -0.4 | -4.6 | -5.0 | -4.8 | 0.4  | -4.9 | -5.2 |
| Uracil-Pentane.1.00      | -4.8 <sup>a</sup> | 13.0 | 1.4  | 1.9  | -1.8 | -5.1 | 0.6  | -0.6 | -4.1 | -4.7 | -4.5 | -0.1 | -4.5 | -4.9 |
| Uracil-Pentane.1.05      | -4.6 <sup>a</sup> | 9.0  | 1.2  | 1.1  | -1.6 | -4.9 | 0.1  | -0.6 | -3.5 | -4.2 | -4.0 | -0.4 | -3.9 | -4.7 |
| Uracil-Pentane.1.10      | -4.1 <sup>a</sup> | 5.8  | 1.0  | 0.6  | -1.3 | -4.6 | -0.2 | -0.5 | -2.8 | -3.7 | -3.5 | -0.4 | -3.2 | -4.0 |
| Uracil-Pentane.1.25      | -2.4 <sup>a</sup> | 1.6  | 0.4  | 0.0  | -0.6 | -3.5 | -0.2 | -0.3 | -1.5 | -2.2 | -2.1 | -0.3 | -1.8 | -2.2 |
| Uracil-Pentane.1.50      | -1.0 <sup>a</sup> | 0.2  | 0.0  | -0.1 | -0.2 | -1.8 | -0.1 | -0.1 | -0.6 | -1.0 | -0.9 | -0.1 | -0.7 | -1.0 |
| Uracil-Pentane.2.00      | -0.2 <sup>a</sup> | -0.0 | -0.0 | -0.0 | -0.1 | -0.4 | -0.0 | -0.0 | -0.1 | -0.2 | -0.2 | -0.0 | -0.2 | -0.2 |
| Uracil-Cyclopentane.0.90 | -3.0 <sup>a</sup> | 23.4 | 3.6  | 4.9  | -0.2 | -3.6 | 3.7  | 0.5  | -3.9 | -4.0 | -3.8 | 1.8  | -3.8 | -4.0 |
| Uracil-Cyclopentane.0.95 | -4.0 <sup>a</sup> | 15.9 | 2.0  | 2.6  | -1.1 | -4.4 | 1.7  | -0.1 | -3.8 | -4.1 | -3.9 | 0.6  | -4.0 | -4.2 |
| Uracil-Cyclopentane.1.00 | -4.1 <sup>a</sup> | 10.9 | 1.4  | 1.5  | -1.2 | -4.5 | 0.7  | -0.3 | -3.3 | -3.9 | -3.7 | 0.1  | -3.7 | -4.2 |
| Uracil-Cyclopentane.1.05 | -3.9 <sup>a</sup> | 7.4  | 1.1  | 0.8  | -1.1 | -4.3 | 0.2  | -0.3 | -2.8 | -3.5 | -3.3 | -0.1 | -3.2 | -3.8 |
| Uracil-Cyclopentane.1.10 | -3.5 <sup>a</sup> | 5.1  | 0.9  | 0.5  | -0.9 | -4.0 | 0.0  | -0.3 | -2.3 | -3.1 | -2.9 | -0.2 | -2.7 | -3.2 |
| Uracil-Cyclopentane.1.25 | -2.3 <sup>a</sup> | 1.6  | 0.4  | 0.1  | -0.4 | -3.1 | -0.1 | -0.2 | -1.3 | -2.0 | -1.9 | -0.2 | -1.6 | -2.2 |
| Uracil-Cyclopentane.1.50 | -1.0 <sup>a</sup> | 0.2  | 0.0  | -0.0 | -0.2 | -1.7 | -0.1 | -0.1 | -0.6 | -1.0 | -0.9 | -0.1 | -0.7 | -1.0 |
| Uracil-Cyclopentane.2.00 | -0.2 <sup>a</sup> | 0.0  | -0.0 | -0.0 | -0.0 | -0.5 | -0.0 | -0.0 | -0.2 | -0.3 | -0.2 | -0.0 | -0.2 | -0.3 |
| Uracil-Neopentane.0.90   | -2.9 <sup>a</sup> | 18.0 | 2.1  | 3.9  | -0.4 | -3.1 | 2.5  | 0.1  | -3.5 | -3.7 | -3.6 | 1.2  | -3.3 | -3.6 |
| Uracil-Neopentane.0.95   | -3.6 <sup>a</sup> | 12.2 | 1.4  | 2.2  | -1.0 | -4.0 | 1.1  | -0.3 | -3.3 | -3.7 | -3.5 | 0.3  | -3.4 | -3.8 |
| Uracil-Neopentane.1.00   | -3.7 <sup>a</sup> | 8.2  | 1.1  | 1.3  | -1.0 | -3.6 | 0.4  | -0.4 | -2.8 | -3.4 | -3.2 | -0.1 | -3.0 | -3.6 |
| Uracil-Neopentane.1.05   | -3.5 <sup>a</sup> | 5.6  | 1.0  | 0.8  | -0.9 | -3.4 | 0.1  | -0.4 | -2.3 | -3.0 | -2.9 | -0.2 | -2.6 | -3.2 |
| Uracil-Neopentane.1.10   | -3.1 <sup>a</sup> | 3.8  | 0.8  | 0.5  | -0.7 | -3.2 | -0.0 | -0.4 | -1.9 | -2.6 | -2.5 | -0.3 | -2.2 | -2.8 |
| Uracil-Neopentane.1.25   | -2.0 <sup>a</sup> | 1.2  | 0.4  | 0.1  | -0.4 | -2.5 | -0.1 | -0.2 | -1.1 | -1.7 | -1.6 | -0.2 | -1.3 | -1.7 |
| Uracil-Neopentane.1.50   | -0.9 <sup>a</sup> | 0.2  | 0.0  | 0.0  | -0.2 | -1.4 | -0.1 | -0.1 | -0.5 | -0.8 | -0.7 | -0.1 | -0.6 | -0.8 |
| Uracil-Neopentane.2.00   | -0.2 <sup>a</sup> | 0.0  | -0.0 | -0.0 | -0.0 | -0.4 | -0.0 | -0.0 | -0.1 | -0.2 | -0.2 | -0.0 | -0.2 | -0.2 |
| Ethene-Pentane.0.90      | -1.7 <sup>a</sup> | 10.1 | 0.1  | -1.3 | -0.2 | -1.9 | 2.0  | 0.1  | -2.1 | -2.2 | -2.1 | 1.5  | -1.6 | -1.5 |
| Ethene-Pentane.0.95      | -2.0 <sup>a</sup> | 6.9  | -0.1 | -1.7 | -0.4 | -2.1 | 1.0  | -0.2 | -2.0 | -2.2 | -2.2 | 0.7  | -1.7 | -1.8 |
| Ethene-Pentane.1.00      | -2.0 <sup>a</sup> | 4.8  | -0.1 | -1.7 | -0.5 | -2.1 | 0.5  | -0.2 | -1.7 | -2.1 | -2.0 | 0.3  | -1.6 | -1.9 |
| Ethene-Pentane.1.05      | -1.9 <sup>a</sup> | 3.3  | -0.1 | -1.4 | -0.4 | -2.0 | 0.2  | -0.2 | -1.4 | -1.8 | -1.8 | 0.1  | -1.4 | -1.8 |
| Ethene-Pentane.1.10      | -1.7 <sup>a</sup> | 2.3  | -0.0 | -1.1 | -0.3 | -1.9 | 0.1  | -0.2 | -1.2 | -1.6 | -1.6 | 0.0  | -1.2 | -1.6 |
| Ethene-Pentane.1.25      | -1.1 <sup>a</sup> | 0.8  | 0.1  | -0.5 | -0.2 | -1.5 | -0.0 | -0.1 | -0.6 | -1.0 | -1.0 | -0.0 | -0.7 | -1.1 |
| Ethene-Pentane.1.50      | -0.5 <sup>a</sup> | 0.1  | 0.0  | -0.1 | -0.0 | -0.9 | -0.0 | -0.0 | -0.3 | -0.5 | -0.5 | -0.0 | -0.3 | -0.5 |
| Ethene-Pentane.2.00      | -0.1 <sup>a</sup> | 0.0  | -0.0 | -0.0 | -0.0 | -0.2 | -0.0 | -0.0 | -0.1 | -0.1 | -0.1 | -0.0 | -0.1 | -0.1 |
| Ethyne-Pentane.0.90      | -1.1 <sup>a</sup> | 7.5  | 1.2  | -0.0 | -0.1 | -1.5 | 1.2  | 0.3  | -1.6 | -1.7 | -1.7 | 1.0  | -1.4 | -1.6 |
| Ethyne-Pentane.0.95      | -1.6 <sup>a</sup> | 5.0  | 0.9  | -0.3 | -0.3 | -1.7 | 0.6  | 0.1  | -1.4 | -1.7 | -1.6 | 0.5  | -1.4 | -1.7 |
| Ethyne-Pentane.1.00      | -1.7 <sup>a</sup> | 3.3  | 0.7  | -0.3 | -0.3 | -1.7 | 0.3  | 0.1  | -1.1 | -1.5 | -1.5 | 0.3  | -1.2 | -1.6 |
| Ethyne-Pentane.1.05      | -1.7 <sup>a</sup> | 2.2  | 0.6  | -0.3 | -0.2 | -1.6 | 0.1  | 0.1  | -0.9 | -1.3 | -1.3 | 0.2  | -1.0 | -1.4 |
| Ethyne-Pentane.1.10      | -1.5 <sup>a</sup> | 1.4  | 0.4  | -0.2 | -0.2 | -1.5 | 0.1  | 0.0  | -0.7 | -1.1 | -1.1 | 0.1  | -0.8 | -1.2 |
| Ethyne-Pentane.1.25      | -1.0 <sup>a</sup> | 0.4  | 0.1  | -0.1 | -0.0 | -1.2 | 0.0  | 0.0  | -0.4 | -0.7 | -0.7 | 0.1  | -0.4 | -0.7 |
| Ethyne-Pentane.1.50      | -0.4 <sup>a</sup> | 0.0  | 0.0  | -0.0 | -0.0 | -0.6 | 0.0  | 0.0  | -0.1 | -0.3 | -0.3 | 0.0  | -0.2 | -0.3 |

... continued on next page ...

Table S10: . . . continued from previous page . . .

| Molecule                    | Ref.              | MNDO | AMI  | PM3  | PM6  | PM7  | OM1  |      | OM2  |      | OM3  |      | OM3  |      | D3T  |
|-----------------------------|-------------------|------|------|------|------|------|------|------|------|------|------|------|------|------|------|
|                             |                   |      |      |      |      |      | D2   | D3   | D2   | D3   | D2   | D3   | D2   | D3   |      |
| Ethylene-Pentane_2.00       | -0.1 <sup>a</sup> | -0.0 | 0.0  | -0.0 | 0.0  | -0.1 | 0.0  | 0.0  | 0.0  | -0.0 | -0.1 | 0.0  | -0.0 | -0.1 | -0.1 |
| Peptide-Pentane_0.90        | -3.8 <sup>a</sup> | 20.5 | 1.0  | 1.3  | -0.9 | -3.3 | 2.9  | 0.2  | 0.2  | -4.0 | -3.9 | 1.9  | -3.4 | -3.3 | -3.2 |
| Peptide-Pentane_0.95        | -4.2 <sup>a</sup> | 15.0 | 0.5  | 0.1  | -1.2 | -3.7 | 1.5  | -0.3 | -0.3 | -3.8 | -4.0 | 0.9  | -3.5 | -3.7 | -3.6 |
| Peptide-Pentane_1.00        | -4.2 <sup>a</sup> | 11.0 | 0.4  | -0.6 | -1.2 | -3.8 | 0.7  | -0.4 | -0.4 | -3.4 | -3.8 | 0.4  | -3.3 | -3.7 | -3.6 |
| Peptide-Pentane_1.05        | -4.0 <sup>a</sup> | 8.0  | 0.4  | -0.6 | -1.1 | -3.7 | 0.3  | -0.4 | -0.4 | -2.9 | -3.5 | 0.1  | -3.0 | -3.5 | -3.4 |
| Peptide-Pentane_1.10        | -3.7 <sup>a</sup> | 5.8  | 0.4  | -0.7 | -0.9 | -3.5 | 0.0  | -0.4 | -0.4 | -2.5 | -3.1 | -0.0 | -2.6 | -3.3 | -3.1 |
| Peptide-Pentane_1.25        | -2.6 <sup>a</sup> | 2.2  | 0.4  | -0.4 | -0.5 | -2.9 | -0.1 | -0.3 | -0.3 | -1.5 | -2.2 | -0.1 | -1.7 | -2.3 | -2.2 |
| Peptide-Pentane_1.50        | -1.2 <sup>a</sup> | 0.3  | 0.1  | -0.1 | -0.1 | -1.8 | -0.1 | -0.1 | -0.1 | -0.6 | -1.1 | -0.1 | -0.7 | -1.1 | -1.0 |
| Peptide-Pentane_2.00        | -0.3 <sup>a</sup> | -0.0 | -0.0 | -0.0 | -0.0 | -0.5 | -0.0 | -0.0 | -0.0 | -0.2 | -0.3 | -0.0 | -0.2 | -0.3 | -0.2 |
| Benzene-Benzene_TS_0.90     | -1.6 <sup>a</sup> | 12.4 | 1.8  | 0.8  | 0.3  | -2.7 | 2.7  | 0.2  | 0.2  | -2.5 | -2.7 | 1.6  | -1.6 | -2.1 | -2.0 |
| Benzene-Benzene_TS_0.95     | -2.6 <sup>a</sup> | 8.3  | 0.9  | -0.1 | -0.6 | -3.2 | 1.3  | -0.4 | -0.4 | -2.6 | -2.9 | 0.6  | -2.1 | -2.6 | -2.5 |
| Benzene-Benzene_TS_1.00     | -2.9 <sup>a</sup> | 5.5  | 0.6  | -0.3 | -0.8 | -3.2 | 0.5  | -0.6 | -0.6 | -2.4 | -2.8 | 0.1  | -2.2 | -2.7 | -2.6 |
| Benzene-Benzene_TS_1.05     | -2.8 <sup>a</sup> | 3.7  | 0.5  | -0.4 | -0.8 | -3.1 | 0.2  | -0.6 | -0.6 | -2.1 | -2.6 | -0.1 | -2.0 | -2.5 | -2.5 |
| Benzene-Benzene_TS_1.10     | -2.6 <sup>a</sup> | 2.5  | 0.4  | -0.4 | -0.6 | -2.8 | -0.0 | -0.6 | -0.6 | -1.8 | -2.3 | -0.2 | -1.7 | -2.3 | -2.2 |
| Benzene-Benzene_TS_1.25     | -1.8 <sup>a</sup> | 0.7  | 0.1  | -0.2 | -0.3 | -2.1 | -0.1 | -0.4 | -0.4 | -1.1 | -1.5 | -0.3 | -1.1 | -1.5 | -1.5 |
| Benzene-Benzene_TS_1.50     | -0.8 <sup>a</sup> | 0.1  | -0.1 | -0.1 | -0.2 | -1.1 | -0.1 | -0.3 | -0.3 | -0.5 | -0.8 | -0.2 | -0.5 | -0.7 | -0.7 |
| Benzene-Benzene_TS_2.00     | -0.2 <sup>a</sup> | -0.0 | -0.0 | -0.0 | -0.1 | -0.4 | -0.0 | -0.1 | -0.1 | -0.2 | -0.2 | -0.1 | -0.2 | -0.2 | -0.2 |
| Pyridine-Pyridine_TS_0.90   | -2.5 <sup>a</sup> | 14.0 | 3.1  | 3.2  | 0.1  | -2.5 | 2.3  | -0.6 | -0.6 | -3.1 | -3.3 | 0.7  | -2.5 | -2.8 | -2.8 |
| Pyridine-Pyridine_TS_0.95   | -3.3 <sup>a</sup> | 9.7  | 1.7  | 1.6  | -0.9 | -3.2 | 0.9  | -1.0 | -1.0 | -3.2 | -3.5 | -0.1 | -2.8 | -3.2 | -3.1 |
| Pyridine-Pyridine_TS_1.00   | -3.5 <sup>a</sup> | 6.7  | 0.9  | 0.8  | -1.2 | -3.3 | 0.2  | -1.2 | -1.2 | -3.0 | -3.4 | -0.5 | -2.8 | -3.2 | -3.1 |
| Pyridine-Pyridine_TS_1.05   | -3.5 <sup>a</sup> | 4.7  | 0.5  | 0.4  | -1.2 | -3.2 | -0.2 | -1.1 | -1.1 | -2.7 | -3.1 | -0.6 | -2.5 | -3.0 | -3.0 |
| Pyridine-Pyridine_TS_1.10   | -3.2 <sup>a</sup> | 3.2  | 0.3  | 0.1  | -1.1 | -3.1 | -0.3 | -1.1 | -1.1 | -2.3 | -2.8 | -0.7 | -2.2 | -2.7 | -2.7 |
| Pyridine-Pyridine_TS_1.25   | -2.3 <sup>a</sup> | 1.0  | -0.0 | -0.1 | -0.7 | -2.4 | -0.4 | -0.8 | -0.8 | -1.6 | -2.0 | -0.6 | -1.5 | -1.9 | -1.9 |
| Pyridine-Pyridine_TS_1.50   | -1.2 <sup>a</sup> | 0.1  | -0.2 | -0.2 | -0.4 | -1.4 | -0.3 | -0.5 | -0.5 | -0.9 | -1.1 | -0.4 | -0.8 | -1.0 | -1.0 |
| Pyridine-Pyridine_TS_2.00   | -0.4 <sup>a</sup> | -0.0 | -0.1 | -0.1 | -0.2 | -0.5 | -0.1 | -0.2 | -0.2 | -0.3 | -0.4 | -0.2 | -0.3 | -0.4 | -0.3 |
| Benzene-Pyridine_TS_0.90    | -2.1 <sup>a</sup> | 12.9 | 1.6  | 0.7  | 0.0  | -2.9 | 2.5  | -0.3 | -0.3 | -3.0 | -3.2 | 1.3  | -1.9 | -2.4 | -2.4 |
| Benzene-Pyridine_TS_0.95    | -3.0 <sup>a</sup> | 8.6  | 0.7  | -0.3 | -0.9 | -3.5 | 1.0  | -0.9 | -0.9 | -3.1 | -3.5 | 0.3  | -2.5 | -3.0 | -2.9 |
| Benzene-Pyridine_TS_1.00    | -3.3 <sup>a</sup> | 5.7  | 0.4  | -0.5 | -1.2 | -3.5 | 0.3  | -1.0 | -1.0 | -2.9 | -3.3 | -0.2 | -2.6 | -3.0 | -3.0 |
| Benzene-Pyridine_TS_1.05    | -3.3 <sup>a</sup> | 3.8  | 0.3  | -0.6 | -1.1 | -3.3 | -0.1 | -1.0 | -1.0 | -2.5 | -3.0 | -0.5 | -2.4 | -2.9 | -2.8 |
| Benzene-Pyridine_TS_1.10    | -3.0 <sup>a</sup> | 2.5  | 0.2  | -0.5 | -1.0 | -3.1 | -0.3 | -1.0 | -1.0 | -2.2 | -2.7 | -0.6 | -2.1 | -2.6 | -2.6 |
| Benzene-Pyridine_TS_1.25    | -2.1 <sup>a</sup> | 0.7  | -0.1 | -0.4 | -0.6 | -2.3 | -0.3 | -0.8 | -0.8 | -1.4 | -1.9 | -0.5 | -1.4 | -1.8 | -1.8 |
| Benzene-Pyridine_TS_1.50    | -1.0 <sup>a</sup> | 0.0  | -0.2 | -0.2 | -0.3 | -1.3 | -0.2 | -0.5 | -0.5 | -0.8 | -1.0 | -0.4 | -0.7 | -0.9 | -0.9 |
| Benzene-Pyridine_TS_2.00    | -0.3 <sup>a</sup> | -0.0 | -0.1 | -0.1 | -0.1 | -0.4 | -0.1 | -0.2 | -0.2 | -0.3 | -0.4 | -0.2 | -0.3 | -0.3 | -0.3 |
| Benzene-Ethylene_CH-pi_0.90 | -1.9 <sup>a</sup> | 10.8 | 0.8  | 0.2  | 0.2  | -1.1 | 1.7  | -1.5 | -1.5 | -3.3 | -3.3 | 0.4  | -1.6 | -1.9 | -1.9 |
| Benzene-Ethylene_CH-pi_0.95 | -2.6 <sup>a</sup> | 7.3  | 0.1  | -0.7 | -0.7 | -1.9 | 0.6  | -1.8 | -1.8 | -3.3 | -3.4 | -0.4 | -2.2 | -2.4 | -2.4 |
| Benzene-Ethylene_CH-pi_1.00 | -2.9 <sup>a</sup> | 4.9  | -0.1 | -0.8 | -1.0 | -2.1 | -0.0 | -1.8 | -1.8 | -3.0 | -3.2 | -0.7 | -2.3 | -2.5 | -2.5 |
| Benzene-Ethylene_CH-pi_1.05 | -2.8 <sup>a</sup> | 3.3  | -0.1 | -0.8 | -1.0 | -2.0 | -0.3 | -1.6 | -1.6 | -2.6 | -2.9 | -0.9 | -2.1 | -2.4 | -2.4 |
| Benzene-Ethylene_CH-pi_1.10 | -2.6 <sup>a</sup> | 2.2  | -0.1 | -0.7 | -0.8 | -1.9 | -0.4 | -1.5 | -1.5 | -2.3 | -2.6 | -0.9 | -1.9 | -2.2 | -2.2 |
| Benzene-Ethylene_CH-pi_1.25 | -1.8 <sup>a</sup> | 0.6  | -0.1 | -0.4 | -0.5 | -1.4 | -0.4 | -1.1 | -1.1 | -1.5 | -1.8 | -0.7 | -1.3 | -1.6 | -1.5 |
| Benzene-Ethylene_CH-pi_1.50 | -0.9 <sup>a</sup> | 0.0  | -0.2 | -0.2 | -0.2 | -0.7 | -0.3 | -0.6 | -0.6 | -0.8 | -1.0 | -0.5 | -0.7 | -0.8 | -0.8 |
| Benzene-Ethylene_CH-pi_2.00 | -0.3 <sup>a</sup> | -0.0 | -0.1 | -0.1 | -0.1 | -0.2 | -0.1 | -0.2 | -0.2 | -0.3 | -0.3 | -0.2 | -0.2 | -0.3 | -0.3 |
| Ethylene-Ethylene_TS_0.90   | -1.2 <sup>a</sup> | 3.3  | -0.4 | -1.1 | -0.2 | -0.7 | 0.1  | -1.6 | -1.6 | -2.2 | -2.3 | -0.8 | -1.4 | -1.6 | -1.6 |
| Ethylene-Ethylene_TS_0.95   | -1.5 <sup>a</sup> | 2.3  | -0.5 | -1.0 | -0.4 | -0.8 | -0.2 | -1.4 | -1.4 | -1.9 | -1.9 | -0.7 | -1.3 | -1.5 | -1.5 |
| Ethylene-Ethylene_TS_1.00   | -1.5 <sup>a</sup> | 1.5  | -0.4 | -0.8 | -0.5 | -0.8 | -0.3 | -1.1 | -1.1 | -1.6 | -1.6 | -0.7 | -1.2 | -1.3 | -1.3 |
| Ethylene-Ethylene_TS_1.05   | -1.5 <sup>a</sup> | 1.0  | -0.3 | -0.6 | -0.4 | -0.7 | -0.3 | -1.0 | -1.0 | -1.3 | -1.4 | -0.6 | -1.0 | -1.2 | -1.2 |

. . . continued on next page . . .

Table S10: . . . continued from previous page . . .

| Molecule                   | Ref.              | MNDO | AMI  | PM3  | PM6  | PM7  | OM1  |      | OM2  |      | OM3  |      | OM3  |      | D3T  |
|----------------------------|-------------------|------|------|------|------|------|------|------|------|------|------|------|------|------|------|
|                            |                   |      |      |      |      |      | OM1  | OM2  | D2   | D3   | D2   | D3   | D2   | D3   |      |
| Ethylene-Ethylene_TS.1.10  | -1.3 <sup>a</sup> | 0.7  | -0.2 | -0.5 | -0.3 | -0.7 | -0.3 | -0.8 | -1.1 | -1.2 | -1.2 | -0.5 | -0.9 | -1.0 | -1.0 |
| Ethylene-Ethylene_TS.1.25  | -0.9 <sup>a</sup> | 0.2  | -0.1 | -0.2 | -0.2 | -0.5 | -0.2 | -0.5 | -0.7 | -0.8 | -0.8 | -0.4 | -0.6 | -0.7 | -0.7 |
| Ethylene-Ethylene_TS.1.50  | -0.5 <sup>a</sup> | -0.0 | -0.1 | -0.1 | -0.1 | -0.3 | -0.1 | -0.3 | -0.4 | -0.4 | -0.4 | -0.2 | -0.3 | -0.4 | -0.4 |
| Ethylene-Ethylene_TS.2.00  | -0.1 <sup>a</sup> | -0.0 | -0.0 | -0.0 | -0.0 | -0.1 | -0.0 | -0.1 | -0.1 | -0.1 | -0.1 | -0.1 | -0.1 | -0.1 | -0.1 |
| Benzene-AcOH_OH-pi.0.90    | -4.0 <sup>a</sup> | 14.8 | 1.4  | 0.4  | -1.3 | -3.1 | 0.8  | -2.8 | -5.0 | -5.1 | -5.0 | -1.1 | -3.6 | -4.1 | -4.0 |
| Benzene-AcOH_OH-pi.0.95    | -4.6 <sup>a</sup> | 10.6 | 0.1  | -0.9 | -2.3 | -3.8 | -0.1 | -2.8 | -4.7 | -4.9 | -4.8 | -1.5 | -3.8 | -4.2 | -4.1 |
| Benzene-AcOH_OH-pi.1.00    | -4.7 <sup>a</sup> | 7.6  | -0.5 | -1.4 | -2.6 | -3.9 | -0.6 | -2.6 | -4.3 | -4.5 | -4.5 | -1.7 | -3.7 | -4.0 | -4.0 |
| Benzene-AcOH_OH-pi.1.05    | -4.5 <sup>a</sup> | 5.4  | -0.6 | -1.5 | -2.5 | -3.8 | -0.9 | -2.4 | -3.8 | -4.0 | -4.0 | -1.6 | -3.4 | -3.7 | -3.7 |
| Benzene-AcOH_OH-pi.1.10    | -4.2 <sup>a</sup> | 3.8  | -0.6 | -1.3 | -2.3 | -3.5 | -1.0 | -2.1 | -3.3 | -3.6 | -3.6 | -1.6 | -3.1 | -3.4 | -3.4 |
| Benzene-AcOH_OH-pi.1.25    | -3.1 <sup>a</sup> | 1.3  | -0.4 | -0.8 | -1.5 | -2.7 | -0.9 | -1.5 | -2.2 | -2.5 | -2.5 | -1.2 | -2.1 | -2.5 | -2.4 |
| Benzene-AcOH_OH-pi.1.50    | -1.7 <sup>a</sup> | 0.1  | -0.3 | -0.4 | -0.8 | -1.6 | -0.6 | -0.9 | -1.2 | -1.4 | -1.4 | -0.8 | -1.2 | -1.4 | -1.4 |
| Benzene-AcOH_OH-pi.2.00    | -0.6 <sup>a</sup> | -0.1 | -0.2 | -0.1 | -0.3 | -0.5 | -0.2 | -0.3 | -0.4 | -0.5 | -0.5 | -0.3 | -0.4 | -0.5 | -0.5 |
| Benzene-AcNH2_NH-pi.0.90   | -3.8 <sup>a</sup> | 11.5 | -0.7 | 0.5  | -1.7 | -3.2 | -0.2 | -3.2 | -5.1 | -5.3 | -5.3 | -1.8 | -4.0 | -4.4 | -4.4 |
| Benzene-AcNH2_NH-pi.0.95   | -4.3 <sup>a</sup> | 8.3  | -1.2 | -0.6 | -2.3 | -3.7 | -0.9 | -3.2 | -4.9 | -5.1 | -5.0 | -2.0 | -4.1 | -4.4 | -4.4 |
| Benzene-AcNH2_NH-pi.1.00   | -4.4 <sup>a</sup> | 5.9  | -1.2 | -1.0 | -2.4 | -3.7 | -1.2 | -3.0 | -4.4 | -4.7 | -4.7 | -2.1 | -3.9 | -4.2 | -4.2 |
| Benzene-AcNH2_NH-pi.1.05   | -4.2 <sup>a</sup> | 4.2  | -1.0 | -1.0 | -2.3 | -3.5 | -1.3 | -2.7 | -3.9 | -4.2 | -4.2 | -2.0 | -3.6 | -3.9 | -3.9 |
| Benzene-AcNH2_NH-pi.1.10   | -4.0 <sup>a</sup> | 3.0  | -0.8 | -1.0 | -2.0 | -3.2 | -1.3 | -2.4 | -3.5 | -3.8 | -3.8 | -1.9 | -3.2 | -3.6 | -3.6 |
| Benzene-AcNH2_NH-pi.1.25   | -3.0 <sup>a</sup> | 1.0  | -0.5 | -0.7 | -1.4 | -2.5 | -1.0 | -1.7 | -2.4 | -2.7 | -2.7 | -1.5 | -2.3 | -2.6 | -2.6 |
| Benzene-AcNH2_NH-pi.1.50   | -1.6 <sup>a</sup> | 0.0  | -0.4 | -0.4 | -0.8 | -1.6 | -0.6 | -1.0 | -1.3 | -1.6 | -1.5 | -0.9 | -1.3 | -1.5 | -1.4 |
| Benzene-AcNH2_NH-pi.2.00   | -0.5 <sup>a</sup> | -0.1 | -0.2 | -0.2 | -0.3 | -0.5 | -0.2 | -0.4 | -0.4 | -0.4 | -0.5 | -0.3 | -0.4 | -0.5 | -0.4 |
| Benzene-Water_OH-pi.0.90   | -2.8 <sup>a</sup> | 9.4  | -0.1 | -1.1 | -1.9 | -2.6 | 0.1  | -2.6 | -4.0 | -4.0 | -4.0 | -1.5 | -3.2 | -3.4 | -3.4 |
| Benzene-Water_OH-pi.0.95   | -3.2 <sup>a</sup> | 6.6  | -0.6 | -1.5 | -2.3 | -2.8 | -0.5 | -2.5 | -3.8 | -3.8 | -3.8 | -1.7 | -3.2 | -3.4 | -3.4 |
| Benzene-Water_OH-pi.1.00   | -3.3 <sup>a</sup> | 4.6  | -0.7 | -1.5 | -2.3 | -2.8 | -0.9 | -2.3 | -3.4 | -3.5 | -3.5 | -1.7 | -3.1 | -3.3 | -3.2 |
| Benzene-Water_OH-pi.1.05   | -3.1 <sup>a</sup> | 3.2  | -0.6 | -1.3 | -2.1 | -2.6 | -1.0 | -2.1 | -3.0 | -3.2 | -3.1 | -1.7 | -2.8 | -3.0 | -3.0 |
| Benzene-Water_OH-pi.1.10   | -2.9 <sup>a</sup> | 2.2  | -0.5 | -1.1 | -1.8 | -2.4 | -1.0 | -1.9 | -2.6 | -2.8 | -2.8 | -1.6 | -2.5 | -2.8 | -2.7 |
| Benzene-Water_OH-pi.1.25   | -2.1 <sup>a</sup> | 0.6  | -0.4 | -0.6 | -1.2 | -1.9 | -0.9 | -1.4 | -1.8 | -2.1 | -2.0 | -1.3 | -1.8 | -2.0 | -2.0 |
| Benzene-Water_OH-pi.1.50   | -1.2 <sup>a</sup> | -0.0 | -0.4 | -0.3 | -0.7 | -1.2 | -0.6 | -0.9 | -1.1 | -1.2 | -1.2 | -0.8 | -1.0 | -1.2 | -1.2 |
| Benzene-Water_OH-pi.2.00   | -0.4 <sup>a</sup> | -0.1 | -0.2 | -0.1 | -0.3 | -0.4 | -0.3 | -0.4 | -0.4 | -0.5 | -0.5 | -0.4 | -0.4 | -0.5 | -0.5 |
| Benzene-MeOH_OH-pi.0.90    | -3.5 <sup>a</sup> | 13.9 | 1.5  | 0.3  | -0.9 | -2.5 | 1.2  | -1.7 | -4.1 | -4.1 | -4.0 | -0.3 | -3.1 | -3.5 | -3.4 |
| Benzene-MeOH_OH-pi.0.95    | -4.0 <sup>a</sup> | 10.0 | 0.4  | -0.8 | -1.7 | -3.2 | 0.2  | -1.8 | -3.9 | -4.0 | -4.0 | -0.8 | -3.3 | -3.7 | -3.6 |
| Benzene-MeOH_OH-pi.1.00    | -4.2 <sup>a</sup> | 7.2  | -0.0 | -1.1 | -1.9 | -3.3 | -0.4 | -1.8 | -3.6 | -3.8 | -3.7 | -1.1 | -3.3 | -3.6 | -3.5 |
| Benzene-MeOH_OH-pi.1.05    | -4.1 <sup>a</sup> | 5.1  | -0.2 | -1.1 | -1.9 | -3.3 | -0.7 | -1.6 | -3.2 | -3.4 | -3.4 | -1.2 | -3.1 | -3.4 | -3.3 |
| Benzene-MeOH_OH-pi.1.10    | -3.8 <sup>a</sup> | 3.6  | -0.2 | -1.0 | -1.7 | -3.1 | -0.8 | -1.5 | -2.8 | -3.1 | -3.1 | -1.2 | -2.8 | -3.1 | -3.1 |
| Benzene-MeOH_OH-pi.1.25    | -2.8 <sup>a</sup> | 1.2  | -0.2 | -0.6 | -1.1 | -2.6 | -0.8 | -1.1 | -1.9 | -2.2 | -2.2 | -1.0 | -1.9 | -2.3 | -2.2 |
| Benzene-MeOH_OH-pi.1.50    | -1.5 <sup>a</sup> | 0.1  | -0.3 | -0.3 | -0.6 | -1.6 | -0.5 | -0.7 | -1.0 | -1.3 | -1.3 | -0.7 | -1.1 | -1.3 | -1.3 |
| Benzene-MeOH_OH-pi.2.00    | -0.5 <sup>a</sup> | -0.1 | -0.2 | -0.1 | -0.3 | -0.5 | -0.2 | -0.3 | -0.4 | -0.5 | -0.5 | -0.3 | -0.4 | -0.5 | -0.4 |
| Benzene-MeNH2_NH-pi.0.90   | -2.5 <sup>a</sup> | 11.7 | 0.7  | 0.5  | -0.8 | -3.0 | 1.5  | -0.4 | -2.9 | -3.0 | -3.0 | 0.8  | -2.2 | -2.6 | -2.5 |
| Benzene-MeNH2_NH-pi.0.95   | -3.1 <sup>a</sup> | 8.3  | 0.3  | -0.2 | -1.3 | -3.5 | 0.5  | -0.7 | -2.9 | -3.1 | -3.0 | 0.1  | -2.5 | -2.9 | -2.8 |
| Benzene-MeNH2_NH-pi.1.00   | -3.2 <sup>a</sup> | 5.8  | 0.2  | -0.4 | -1.4 | -3.6 | -0.0 | -0.8 | -2.6 | -2.9 | -2.9 | -0.3 | -2.5 | -2.9 | -2.8 |
| Benzene-MeNH2_NH-pi.1.05   | -3.1 <sup>a</sup> | 4.0  | 0.1  | -0.5 | -1.3 | -3.5 | -0.3 | -0.8 | -2.3 | -2.7 | -2.6 | -0.5 | -2.3 | -2.7 | -2.6 |
| Benzene-MeNH2_NH-pi.1.10   | -2.9 <sup>a</sup> | 2.7  | 0.1  | -0.4 | -1.1 | -3.3 | -0.4 | -0.8 | -2.0 | -2.4 | -2.3 | -0.5 | -2.0 | -2.4 | -2.4 |
| Benzene-MeNH2_NH-pi.1.25   | -1.9 <sup>a</sup> | 0.8  | -0.1 | -0.3 | -0.7 | -2.5 | -0.4 | -0.6 | -1.2 | -1.6 | -1.6 | -0.5 | -1.3 | -1.6 | -1.6 |
| Benzene-MeNH2_NH-pi.1.50   | -0.9 <sup>a</sup> | 0.0  | -0.2 | -0.2 | -0.3 | -1.4 | -0.3 | -0.4 | -0.6 | -0.8 | -0.8 | -0.3 | -0.6 | -0.8 | -0.8 |
| Benzene-MeNH2_NH-pi.2.00   | -0.3 <sup>a</sup> | -0.0 | -0.1 | -0.1 | -0.1 | -0.3 | -0.1 | -0.1 | -0.2 | -0.3 | -0.2 | -0.1 | -0.2 | -0.2 | -0.2 |
| Benzene-Peptide_NH-pi.0.90 | -3.7 <sup>a</sup> | 18.2 | 1.1  | 1.3  | -0.6 | -4.1 | 2.3  | -1.0 | -4.6 | -4.8 | -4.7 | 1.1  | -3.2 | -3.8 | -3.7 |

. . . continued on next page . . .

Table S10: . . . continued from previous page . . .

| Molecule                    | Ref.              | MNDO | AMI  | PM3  | PM6  | PM7  | OM1  |      | OM2  |      | OM3  |      | OM3  |      | D3T  |
|-----------------------------|-------------------|------|------|------|------|------|------|------|------|------|------|------|------|------|------|
|                             |                   |      |      |      |      |      | OM1  | OM2  | D2   | D3   | OM3  | D3   | D2   | D3T  |      |
| Benzene-Peptide_NH-pi.0.95  | -5.0 <sup>a</sup> | 12.3 | 0.1  | -0.4 | -1.9 | -5.2 | 0.6  | -1.7 | -4.7 | -5.1 | -5.0 | -0.3 | -4.0 | -4.5 | -4.4 |
| Benzene-Peptide_NH-pi.1.00  | -5.3 <sup>a</sup> | 8.3  | -0.1 | -0.9 | -2.3 | -5.4 | -0.3 | -1.9 | -4.4 | -4.9 | -4.8 | -0.9 | -4.0 | -4.6 | -4.5 |
| Benzene-Peptide_NH-pi.1.05  | -5.1 <sup>a</sup> | 5.6  | -0.2 | -1.0 | -2.2 | -5.2 | -0.7 | -1.8 | -3.9 | -4.5 | -4.4 | -1.1 | -3.8 | -4.3 | -4.2 |
| Benzene-Peptide_NH-pi.1.10  | -4.8 <sup>a</sup> | 3.8  | -0.2 | -0.9 | -1.9 | -4.8 | -0.9 | -1.7 | -3.4 | -4.0 | -3.9 | -1.2 | -3.4 | -3.9 | -3.9 |
| Benzene-Peptide_NH-pi.1.25  | -3.4 <sup>a</sup> | 1.1  | -0.3 | -0.6 | -1.2 | -3.7 | -0.8 | -1.3 | -2.3 | -2.8 | -2.8 | -1.1 | -2.3 | -2.8 | -2.7 |
| Benzene-Peptide_NH-pi.1.50  | -1.8 <sup>a</sup> | 0.0  | -0.4 | -0.4 | -0.7 | -2.2 | -0.5 | -0.8 | -1.3 | -1.6 | -1.5 | -0.7 | -1.2 | -1.5 | -1.5 |
| Benzene-Peptide_NH-pi.2.00  | -0.6 <sup>a</sup> | -0.1 | -0.2 | -0.2 | -0.3 | -0.7 | -0.3 | -0.4 | -0.5 | -0.6 | -0.6 | -0.4 | -0.5 | -0.6 | -0.5 |
| Pyridine-Pyridine_CH-N.0.90 | -2.8 <sup>a</sup> | 14.1 | 3.9  | 3.1  | -0.1 | -1.5 | 2.1  | 1.8  | -3.3 | -3.4 | -3.5 | -0.7 | -2.5 | -2.9 | -2.9 |
| Pyridine-Pyridine_CH-N.0.95 | -3.8 <sup>a</sup> | 9.7  | 1.8  | 1.5  | -1.7 | -3.0 | 0.1  | -2.4 | -3.8 | -3.9 | -4.0 | 1.4  | -3.1 | -3.3 | -3.4 |
| Pyridine-Pyridine_CH-N.1.00 | -4.1 <sup>a</sup> | 5.5  | -0.1 | -0.1 | -2.5 | -3.6 | -1.2 | -2.6 | -3.7 | -3.9 | -3.9 | -1.8 | -3.2 | -3.4 | -3.4 |
| Pyridine-Pyridine_CH-N.1.05 | -3.9 <sup>a</sup> | 3.2  | -1.0 | -0.7 | -2.5 | -3.4 | -1.5 | -2.4 | -3.3 | -3.5 | -3.5 | -1.7 | -2.9 | -3.1 | -3.1 |
| Pyridine-Pyridine_CH-N.1.10 | -3.4 <sup>a</sup> | 1.8  | -1.1 | -0.8 | -2.2 | -3.1 | -1.5 | -2.1 | -2.8 | -3.0 | -3.1 | -1.6 | -2.5 | -2.7 | -2.8 |
| Pyridine-Pyridine_CH-N.1.25 | -2.2 <sup>a</sup> | 0.2  | -0.7 | -0.7 | -1.3 | -2.2 | -1.0 | -1.3 | -1.7 | -1.9 | -1.9 | -1.0 | -1.5 | -1.7 | -1.8 |
| Pyridine-Pyridine_CH-N.1.50 | -1.0 <sup>a</sup> | -0.2 | -0.4 | -0.3 | -0.6 | -1.4 | -0.5 | -0.6 | -0.8 | -0.9 | -1.0 | -0.5 | -0.7 | -0.8 | -0.8 |
| Pyridine-Pyridine_CH-N.2.00 | -0.3 <sup>a</sup> | -0.1 | -0.1 | -0.1 | -0.2 | -0.7 | -0.1 | -0.2 | -0.2 | -0.3 | -0.3 | -0.1 | -0.2 | -0.2 | -0.2 |
| Ethylene-Water_CH-O.0.95    | -2.5 <sup>a</sup> | 6.8  | -1.2 | -0.9 | -1.7 | -1.0 | -1.4 | -3.7 | -4.1 | -4.1 | -4.1 | -3.1 | -3.5 | -3.6 | -3.6 |
| Ethylene-Water_CH-O.0.95    | -2.8 <sup>a</sup> | 4.9  | -1.7 | -0.6 | -1.8 | -1.3 | -1.7 | -3.4 | -3.7 | -3.7 | -3.7 | -2.9 | -3.2 | -3.4 | -3.4 |
| Ethylene-Water_CH-O.1.00    | -2.8 <sup>a</sup> | 3.4  | -1.8 | -0.6 | -1.7 | -1.5 | -1.8 | -3.0 | -3.3 | -3.3 | -3.3 | -2.7 | -3.0 | -3.1 | -3.1 |
| Ethylene-Water_CH-O.1.05    | -2.8 <sup>a</sup> | 2.4  | -1.7 | -0.8 | -1.6 | -1.5 | -1.8 | -2.7 | -2.9 | -3.0 | -3.0 | -2.5 | -2.8 | -2.9 | -2.9 |
| Ethylene-Water_CH-O.1.10    | -2.6 <sup>a</sup> | 1.6  | -1.5 | -0.9 | -1.4 | -1.4 | -1.7 | -2.4 | -2.6 | -2.7 | -2.7 | -2.3 | -2.6 | -2.6 | -2.6 |
| Ethylene-Water_CH-O.1.25    | -2.0 <sup>a</sup> | 0.3  | -1.0 | -0.8 | -0.9 | -1.1 | -1.3 | -1.8 | -1.9 | -2.0 | -2.0 | -1.7 | -1.9 | -2.0 | -2.0 |
| Ethylene-Water_CH-O.1.50    | -1.2 <sup>a</sup> | -0.2 | -0.5 | -0.5 | -0.5 | -0.6 | -0.8 | -1.1 | -1.2 | -1.2 | -1.2 | -1.1 | -1.2 | -1.2 | -1.2 |
| Ethylene-Water_CH-O.2.00    | -0.5 <sup>a</sup> | -0.2 | -0.2 | -0.2 | -0.2 | -0.2 | -0.4 | -0.5 | -0.5 | -0.5 | -0.5 | -0.5 | -0.5 | -0.5 | -0.5 |
| Ethylene-AcOH_OH-pi.0.90    | -4.3 <sup>a</sup> | 11.6 | 0.1  | -0.2 | -0.7 | -1.1 | -0.7 | -4.8 | -6.0 | -6.0 | -6.0 | -3.1 | -4.3 | -4.7 | -4.7 |
| Ethylene-AcOH_OH-pi.0.95    | -4.8 <sup>a</sup> | 8.3  | -1.0 | -1.3 | -1.5 | -2.0 | -1.2 | -4.4 | -5.4 | -5.4 | -5.4 | -3.0 | -4.2 | -4.4 | -4.5 |
| Ethylene-AcOH_OH-pi.1.00    | -4.9 <sup>a</sup> | 5.9  | -1.5 | -1.9 | -1.9 | -2.3 | -1.5 | -3.9 | -4.8 | -4.8 | -4.8 | -2.8 | -3.9 | -4.1 | -4.1 |
| Ethylene-AcOH_OH-pi.1.05    | -4.7 <sup>a</sup> | 4.2  | -1.6 | -2.0 | -1.9 | -2.3 | -1.6 | -3.4 | -4.2 | -4.2 | -4.2 | -2.5 | -3.5 | -3.7 | -3.7 |
| Ethylene-AcOH_OH-pi.1.10    | -4.4 <sup>a</sup> | 2.9  | -1.4 | -1.9 | -1.8 | -2.2 | -1.6 | -2.9 | -3.6 | -3.7 | -3.7 | -2.2 | -3.1 | -3.3 | -3.3 |
| Ethylene-AcOH_OH-pi.1.25    | -3.3 <sup>a</sup> | 0.9  | -0.8 | -1.2 | -1.2 | -1.6 | -1.2 | -1.9 | -2.3 | -2.5 | -2.5 | -1.6 | -2.1 | -2.3 | -2.3 |
| Ethylene-AcOH_OH-pi.1.50    | -1.8 <sup>a</sup> | -0.0 | -0.4 | -0.5 | -0.6 | -1.0 | -0.7 | -1.0 | -1.2 | -1.4 | -1.4 | -0.9 | -1.1 | -1.3 | -1.3 |
| Ethylene-AcOH_OH-pi.2.00    | -0.6 <sup>a</sup> | -0.1 | -0.2 | -0.2 | -0.2 | -0.3 | -0.3 | -0.4 | -0.4 | -0.5 | -0.5 | -0.3 | -0.4 | -0.4 | -0.4 |
| Pentane-AcOH.0.90           | -2.7 <sup>a</sup> | 13.0 | 0.3  | 0.2  | -1.5 | -2.7 | 1.1  | -0.6 | -3.3 | -3.5 | -3.4 | 0.4  | -3.1 | -3.3 | -3.2 |
| Pentane-AcOH.0.95           | -2.9 <sup>a</sup> | 9.8  | 0.2  | -0.2 | -1.4 | -2.8 | 0.5  | -0.6 | -3.0 | -3.3 | -3.2 | 0.0  | -2.9 | -3.2 | -3.1 |
| Pentane-AcOH.1.00           | -2.9 <sup>a</sup> | 7.3  | 0.2  | -0.5 | -1.2 | -2.7 | 0.1  | -0.6 | -2.6 | -3.0 | -2.9 | -0.1 | -2.6 | -3.0 | -3.0 |
| Pentane-AcOH.1.05           | -2.7 <sup>a</sup> | 5.4  | 0.2  | -0.5 | -1.0 | -2.6 | -0.1 | -0.5 | -2.2 | -2.7 | -2.6 | -0.2 | -2.3 | -2.8 | -2.7 |
| Pentane-AcOH.1.10           | -2.5 <sup>a</sup> | 4.1  | 0.2  | -0.5 | -0.9 | -2.5 | -0.1 | -0.5 | -1.9 | -2.4 | -2.3 | -0.3 | -2.0 | -2.5 | -2.5 |
| Pentane-AcOH.1.25           | -1.8 <sup>a</sup> | 1.7  | 0.2  | -0.3 | -0.5 | -2.1 | -0.2 | -0.3 | -1.2 | -1.7 | -1.6 | -0.2 | -1.3 | -1.8 | -1.7 |
| Pentane-AcOH.1.50           | -0.8 <sup>a</sup> | 0.3  | 0.0  | -0.1 | -0.2 | -1.3 | -0.1 | -0.1 | -0.5 | -0.8 | -0.8 | -0.1 | -0.6 | -0.8 | -0.8 |
| Pentane-AcOH.2.00           | -0.2 <sup>a</sup> | 0.0  | -0.0 | -0.0 | -0.1 | -0.4 | -0.0 | -0.0 | -0.1 | -0.2 | -0.2 | -0.0 | -0.1 | -0.2 | -0.2 |
| Pentane-AcNH2.0.90          | -3.2 <sup>a</sup> | 16.3 | 0.3  | 0.9  | -1.6 | -3.3 | 1.7  | -0.7 | -3.8 | -3.9 | -3.8 | 0.6  | -3.5 | -3.6 | -3.4 |
| Pentane-AcNH2.0.95          | -3.5 <sup>a</sup> | 11.7 | 0.1  | -0.0 | -1.6 | -3.5 | 0.7  | -0.8 | -3.5 | -3.7 | -3.6 | 0.1  | -3.3 | -3.6 | -3.5 |
| Pentane-AcNH2.1.00          | -3.5 <sup>a</sup> | 8.5  | 0.1  | -0.4 | -1.4 | -3.4 | 0.2  | -0.8 | -3.0 | -3.4 | -3.3 | -0.2 | -3.0 | -3.4 | -3.3 |
| Pentane-AcNH2.1.05          | -3.3 <sup>a</sup> | 6.1  | 0.1  | -0.6 | -1.2 | -3.2 | -0.1 | -0.7 | -2.5 | -3.1 | -3.0 | -0.3 | -2.6 | -3.1 | -3.0 |
| Pentane-AcNH2.1.10          | -3.0 <sup>a</sup> | 4.4  | 0.2  | -0.6 | -1.0 | -3.0 | -0.2 | -0.6 | -2.1 | -2.7 | -2.6 | -0.3 | -2.3 | -2.8 | -2.7 |
| Pentane-AcNH2.1.25          | -2.1 <sup>a</sup> | 1.6  | 0.2  | -0.4 | -0.5 | -2.4 | -0.2 | -0.4 | -1.3 | -1.8 | -1.7 | -0.3 | -1.4 | -1.9 | -1.8 |

. . . continued on next page . . .

Table S10: . . . continued from previous page . . .

| Molecule             | Ref.              | MNDO | AMI  | PM3  | PM6  | PM7  | OM1  | OM2  |      | OM3  |      | D3T  |      |
|----------------------|-------------------|------|------|------|------|------|------|------|------|------|------|------|------|
|                      |                   |      |      |      |      |      |      | D2   | D3   | D2   | D3   |      |      |
| Pentane-AcNH2.1.50   | -1.0 <sup>a</sup> | 0.3  | 0.0  | -0.1 | -0.2 | -1.5 | -0.1 | -0.2 | -0.6 | -0.9 | -0.1 | -0.7 | -0.9 |
| Pentane-AcNH2.2.00   | -0.3 <sup>a</sup> | -0.0 | -0.0 | -0.0 | -0.0 | -0.4 | -0.0 | -0.0 | -0.2 | -0.3 | -0.0 | -0.2 | -0.2 |
| Benzene-AcOH.0.90    | -2.7 <sup>a</sup> | 14.6 | 3.0  | 2.8  | -0.9 | -2.7 | 1.3  | 1.3  | -4.4 | -4.4 | 0.2  | -3.5 | -3.8 |
| Benzene-AcOH.0.95    | -3.6 <sup>a</sup> | 9.8  | 2.0  | 1.4  | -1.5 | -3.3 | 0.3  | -1.5 | -4.1 | -4.3 | -0.4 | -3.6 | -3.9 |
| Benzene-AcOH.1.00    | -3.8 <sup>a</sup> | 6.5  | 1.3  | 0.7  | -1.6 | -3.5 | -0.2 | -1.5 | -3.6 | -4.0 | -0.7 | -3.3 | -3.7 |
| Benzene-AcOH.1.05    | -3.7 <sup>a</sup> | 4.4  | 0.9  | 0.2  | -1.5 | -3.4 | -0.4 | -1.3 | -3.1 | -3.5 | -0.8 | -2.9 | -3.4 |
| Benzene-AcOH.1.10    | -3.3 <sup>a</sup> | 2.9  | 0.5  | 0.0  | -1.3 | -3.3 | -0.5 | -1.2 | -2.6 | -3.1 | -0.8 | -2.5 | -3.0 |
| Benzene-AcOH.1.25    | -2.2 <sup>a</sup> | 0.8  | -0.0 | -0.2 | -0.8 | -2.7 | -0.4 | -0.9 | -1.6 | -2.1 | -0.6 | -1.6 | -1.9 |
| Benzene-AcOH.1.50    | -1.0 <sup>a</sup> | 0.0  | -0.2 | -0.2 | -0.4 | -1.5 | -0.3 | -0.5 | -0.8 | -1.1 | -0.4 | -0.8 | -0.9 |
| Benzene-AcOH.2.00    | -0.3 <sup>a</sup> | -0.0 | -0.1 | -0.1 | -0.1 | -0.4 | -0.1 | -0.2 | -0.3 | -0.3 | -0.1 | -0.2 | -0.3 |
| Peptide-Ethene.0.90  | -2.6 <sup>a</sup> | 11.3 | 0.7  | 1.5  | -1.2 | -2.1 | 0.7  | -1.3 | -3.2 | -3.3 | -0.3 | -2.7 | -2.9 |
| Peptide-Ethene.0.95  | -2.9 <sup>a</sup> | 8.1  | 0.2  | 0.6  | -1.3 | -2.4 | 0.1  | -1.3 | -2.9 | -3.1 | -0.6 | -2.7 | -2.9 |
| Peptide-Ethene.1.00  | -3.0 <sup>a</sup> | 5.8  | 0.1  | 0.1  | -1.2 | -2.4 | -0.2 | -1.2 | -2.6 | -2.8 | -0.7 | -2.5 | -2.7 |
| Peptide-Ethene.1.05  | -2.9 <sup>a</sup> | 4.2  | 0.0  | -0.1 | -1.1 | -2.3 | -0.4 | -1.0 | -2.2 | -2.6 | -0.7 | -2.2 | -2.5 |
| Peptide-Ethene.1.10  | -2.6 <sup>a</sup> | 3.0  | 0.0  | -0.2 | -0.9 | -2.1 | -0.4 | -0.9 | -1.9 | -2.3 | -0.7 | -1.9 | -2.3 |
| Peptide-Ethene.1.25  | -1.9 <sup>a</sup> | 1.1  | 0.0  | -0.2 | -0.5 | -1.8 | -0.3 | -0.6 | -1.2 | -1.6 | -0.5 | -1.2 | -1.6 |
| Peptide-Ethene.1.50  | -0.9 <sup>a</sup> | 0.1  | -0.1 | -0.1 | -0.2 | -1.1 | -0.2 | -0.3 | -0.6 | -0.8 | -0.3 | -0.6 | -0.8 |
| Peptide-Ethene.2.00  | -0.2 <sup>a</sup> | -0.0 | -0.0 | -0.0 | -0.1 | -0.2 | -0.1 | -0.1 | -0.2 | -0.2 | -0.1 | -0.1 | -0.2 |
| Pyridine-Ethyne.0.90 | -3.5 <sup>a</sup> | 6.8  | 1.7  | -0.5 | -0.2 | -0.5 | -1.0 | -4.0 | -4.6 | -4.8 | -3.6 | -4.4 | -4.7 |
| Pyridine-Ethyne.0.95 | -3.9 <sup>a</sup> | 4.9  | 0.9  | -0.4 | -0.9 | -1.4 | -1.5 | -3.7 | -4.3 | -4.5 | -3.2 | -4.0 | -4.3 |
| Pyridine-Ethyne.1.00 | -4.0 <sup>a</sup> | 3.5  | 0.3  | -0.5 | -1.3 | -1.8 | -1.8 | -3.3 | -3.9 | -4.1 | -2.9 | -3.6 | -3.8 |
| Pyridine-Ethyne.1.05 | -3.9 <sup>a</sup> | 2.4  | -0.1 | -0.7 | -1.5 | -2.0 | -1.9 | -3.0 | -3.5 | -3.7 | -2.6 | -3.2 | -3.4 |
| Pyridine-Ethyne.1.10 | -3.7 <sup>a</sup> | 1.6  | -0.5 | -0.8 | -1.5 | -2.0 | -1.9 | -2.7 | -3.1 | -3.3 | -2.3 | -2.9 | -3.1 |
| Pyridine-Ethyne.1.25 | -2.8 <sup>a</sup> | 0.3  | -0.9 | -0.8 | -1.3 | -1.7 | -1.5 | -2.0 | -2.3 | -2.4 | -1.7 | -2.1 | -2.2 |
| Pyridine-Ethyne.1.50 | -1.7 <sup>a</sup> | -0.2 | -0.6 | -0.5 | -0.7 | -1.2 | -0.9 | -1.2 | -1.3 | -1.4 | -1.0 | -1.2 | -1.3 |
| Pyridine-Ethyne.2.00 | -0.6 <sup>a</sup> | -0.2 | -0.3 | -0.3 | -0.3 | -0.7 | -0.4 | -0.5 | -0.5 | -0.6 | -0.4 | -0.5 | -0.5 |
| MeNH2-Pyridine.0.90  | -3.4 <sup>a</sup> | 13.1 | 2.9  | 4.1  | 0.4  | -3.1 | 1.6  | -0.2 | -2.3 | -2.5 | 0.3  | -2.3 | -2.5 |
| MeNH2-Pyridine.0.95  | -3.9 <sup>a</sup> | 9.7  | 1.7  | 2.8  | -0.8 | -4.0 | 0.4  | -0.8 | -2.6 | -2.8 | -0.3 | -2.6 | -2.9 |
| MeNH2-Pyridine.1.00  | -4.0 <sup>a</sup> | 7.1  | 0.9  | 1.7  | -1.3 | -4.3 | -0.3 | -1.0 | -2.6 | -2.9 | -0.6 | -2.7 | -2.9 |
| MeNH2-Pyridine.1.05  | -3.9 <sup>a</sup> | 5.2  | 0.4  | 1.0  | -1.6 | -4.4 | -0.7 | -1.1 | -2.5 | -2.8 | -0.8 | -2.6 | -2.8 |
| MeNH2-Pyridine.1.10  | -3.6 <sup>a</sup> | 3.7  | 0.1  | 0.5  | -1.6 | -4.3 | -0.9 | -1.0 | -2.3 | -2.6 | -0.8 | -2.4 | -2.7 |
| MeNH2-Pyridine.1.25  | -2.7 <sup>a</sup> | 1.3  | -0.3 | -0.1 | -1.3 | -3.6 | -0.9 | -0.8 | -1.6 | -2.0 | -0.7 | -1.7 | -2.0 |
| MeNH2-Pyridine.1.50  | -1.5 <sup>a</sup> | 0.0  | -0.3 | -0.2 | -0.7 | -2.4 | -0.6 | -0.5 | -0.9 | -1.2 | -0.5 | -0.9 | -1.1 |
| MeNH2-Pyridine.2.00  | -0.5 <sup>a</sup> | -0.2 | -0.2 | -0.1 | -0.3 | -0.9 | -0.3 | -0.2 | -0.3 | -0.4 | -0.2 | -0.3 | -0.4 |

a J.Rezac, K.E.Riley, and P.Hobza, J.Chem.Theory Comput. 7, 2427 (2011) ; 7, 3466 (2011).



## 2 Figures: Reference and Optimized SQC Geometries of Selected Noncovalent Complexes

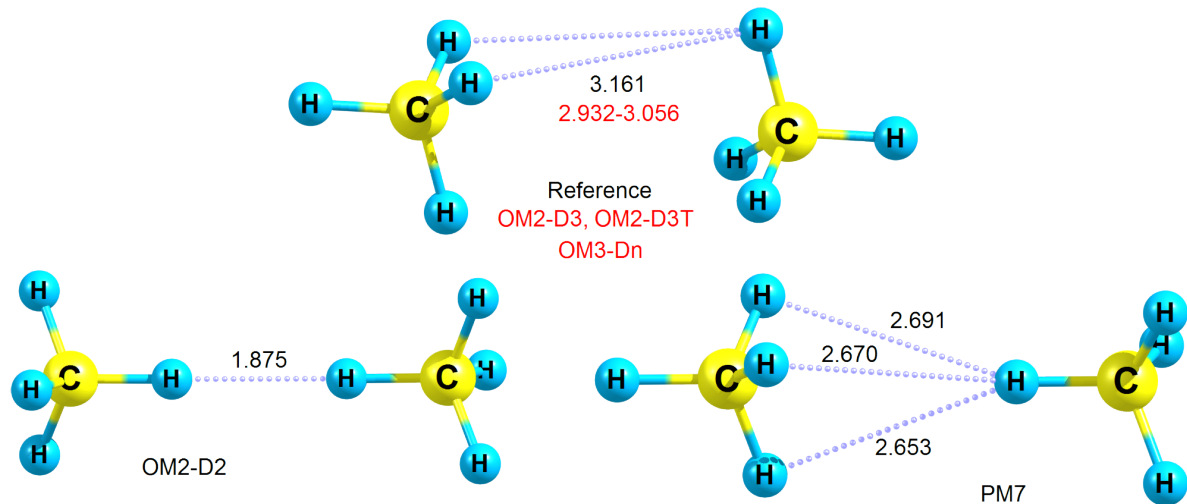

Figure S1: Reference, OM2-D3, OM2-D3T, and OM3-D<sub>n</sub> geometries of the methane dimer from the S22 data set (top) and geometries optimized with the OM2-D2 (bottom left) and PM7 (bottom right) methods. Selected interatomic distances are given in Ångstrom.

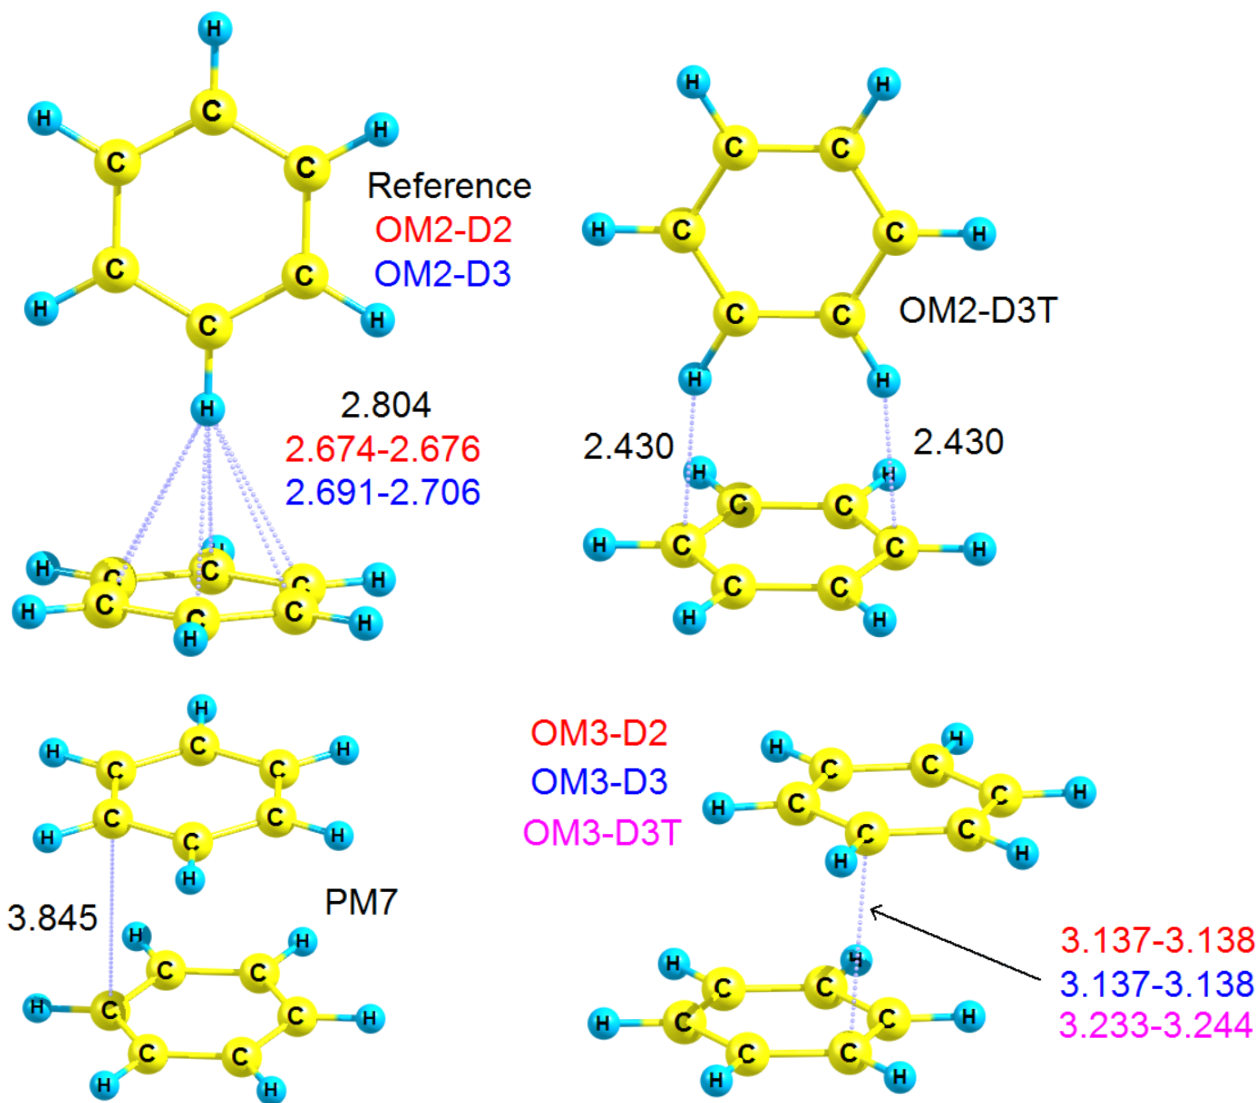

Figure S2: Reference, OM2-D2, and OM2-D3 geometries of the T-shaped benzene dimer from the S22 data set (top left) and geometries optimized with other OM $x$ -D $n$  and PM7 methods. Selected interatomic distances are given in Ångstrom.

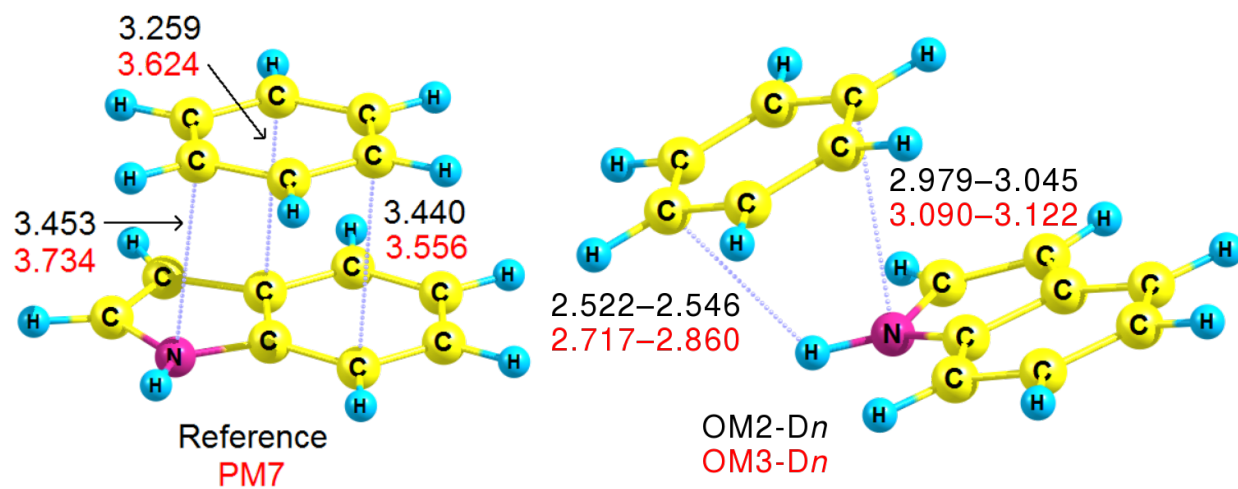

Figure S3: Reference and PM7 geometries of the indole...benzene dimer from the S22 data set (left) and geometries optimized with  $OMx$ -Dn (right). Selected interatomic distances are given in Ångstrom.

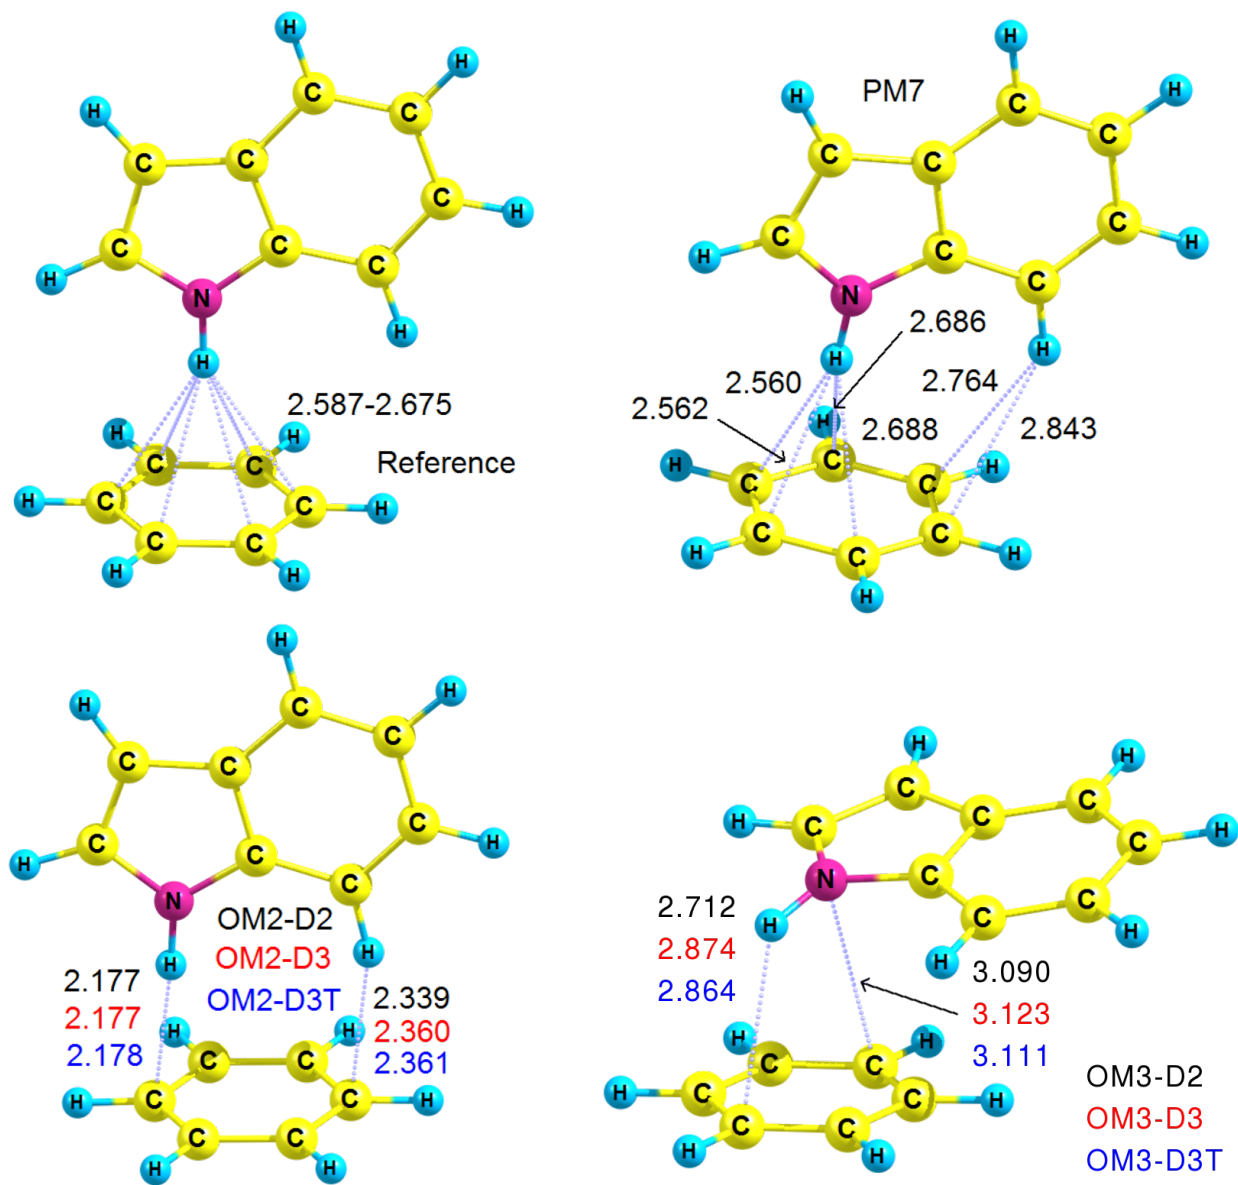

Figure S4: Reference geometry of the T-shaped indole $\cdots$ benzene dimer from the S22 data set (top left) and geometries optimized with PM7 (top right), OM2-D $n$  (bottom left), and OM3-D $n$  (bottom right). Selected interatomic distances are given in Ångstrom.

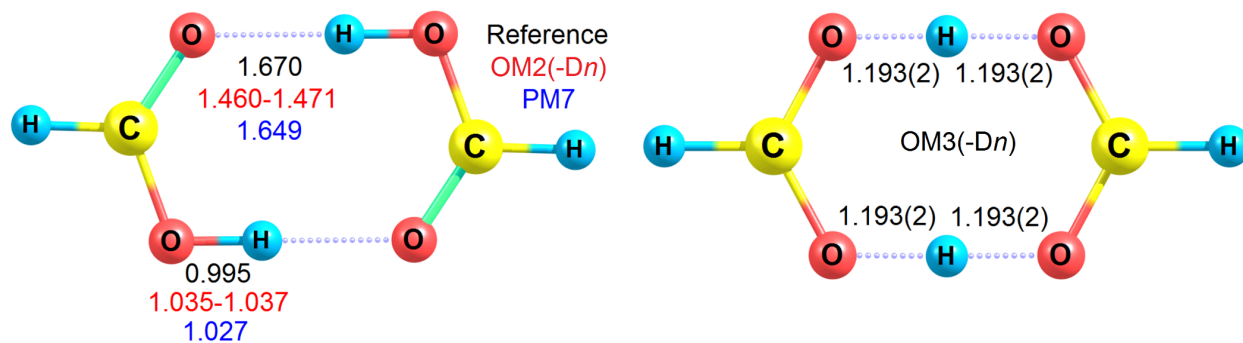

Figure S5: Reference, PM7 and OM2(-Dn) geometries of the formic acid dimer from the S22 data set (left) and geometries optimized with the OM3(-Dn) methods (right). Selected interatomic distances are given in Ångstrom.

### 3 Additional Statistical Evaluations for RM1

The RM1 method is a reparametrization of the AM1 method. According to the following statistical evaluations, it tends to be generally more accurate than AM1, about as accurate as the PM $x$  methods, and somewhat less accurate than the OM $x$  methods.

For the CHNO benchmark set (Table S11), RM1 predicts heats of formation with a mean absolute error (MAE) of 4.22 kcal/mol, similar to that of PM3 and about 1.1 kcal/mol higher than those of OM2 and OM3. The MAEs of RM1 for bond lengths and angles are similar to those of the PM $x$  methods. For ionization potentials, RM1 performs better than the PM $x$  methods, but not as well as OM2 (MAE 0.36 vs. 0.26 eV). Dipole moments are predicted best by RM1 (MAE 0.21 D vs. 0.23–0.26 D for the OM $x$  methods). RM1 also gives reasonable relative energies and barriers, but is in both cases less accurate than OM2 (MAEs 2.50 vs. 1.96 kcal/mol and 2.39 vs. 1.63 kcal/mol, respectively).

For the FLUOR set (Table S12), RM1 gives larger errors for the heats of formation (MAE 6.27 kcal/mol) compared with the PM $x$  methods (MAEs 5.21–5.87 kcal/mol) and the OM $x$  methods (MAEs 3.70–4.92 kcal/mol). Bond lengths, bond angles, and ionization potentials are predicted by RM1 somewhat less accurately than by the OM $x$  methods, whereas dipole moments are reproduced with similar accuracy (MAE 0.27 D vs. 0.25–0.31 D).

Table S11: Mean Absolute Errors in Calculated Heats of Formation, Relative Energies and Barriers (kcal/mol), Bond Lengths (Å), Bond Angles (degree), Ionization Potentials (eV), and Dipole Moments (D) for the CHNO Set and Its Subsets: MNDO, AM1, RM1, PM $x$ , and OM $x$

| Subset                | N   | Method |       |       |       |       |       |       |       |       |
|-----------------------|-----|--------|-------|-------|-------|-------|-------|-------|-------|-------|
|                       |     | MNDO   | AM1   | RM1   | PM3   | PM6   | PM7   | OM1   | OM2   | OM3   |
| Heats of formation    |     |        |       |       |       |       |       |       |       |       |
| Overall               | 140 | 6.34   | 5.51  | 4.22  | 4.17  | 4.80  | 3.80  | 3.46  | 3.10  | 3.05  |
| CH                    | 57  | 5.90   | 4.89  | 4.86  | 3.63  | 4.74  | 3.50  | 2.49  | 1.72  | 1.63  |
| CHN                   | 32  | 6.24   | 4.65  | 3.89  | 5.02  | 4.30  | 4.11  | 4.27  | 3.92  | 3.80  |
| CHO                   | 39  | 4.80   | 5.54  | 3.14  | 3.69  | 4.53  | 3.42  | 3.41  | 4.53  | 4.20  |
| CHNO                  | 4   | 13.52  | 8.36  | 4.66  | 3.00  | 2.59  | 1.48  | 6.18  | 1.96  | 3.24  |
| HNO                   | 8   | 13.73  | 11.93 | 6.09  | 7.54  | 9.63  | 7.71  | 5.94  | 3.28  | 4.53  |
| Bond lengths          |     |        |       |       |       |       |       |       |       |       |
| Overall               | 242 | 0.014  | 0.017 | 0.013 | 0.011 | 0.012 | 0.011 | 0.012 | 0.016 | 0.019 |
| CH                    | 113 | 0.011  | 0.013 | 0.011 | 0.011 | 0.009 | 0.009 | 0.012 | 0.010 | 0.009 |
| CHN                   | 49  | 0.011  | 0.015 | 0.011 | 0.010 | 0.010 | 0.009 | 0.009 | 0.015 | 0.027 |
| CHO                   | 57  | 0.017  | 0.019 | 0.013 | 0.011 | 0.013 | 0.011 | 0.013 | 0.018 | 0.022 |
| CHNO                  | 5   | 0.015  | 0.017 | 0.010 | 0.016 | 0.011 | 0.010 | 0.013 | 0.018 | 0.033 |
| HNO                   | 18  | 0.036  | 0.038 | 0.032 | 0.016 | 0.036 | 0.036 | 0.019 | 0.049 | 0.043 |
| Bond angles           |     |        |       |       |       |       |       |       |       |       |
| Overall               | 101 | 2.56   | 1.90  | 2.26  | 2.08  | 2.14  | 2.31  | 1.82  | 2.24  | 1.85  |
| CH                    | 38  | 1.81   | 1.36  | 2.06  | 1.57  | 1.64  | 1.88  | 1.45  | 1.46  | 1.23  |
| CHN                   | 22  | 2.03   | 1.86  | 2.04  | 2.04  | 1.86  | 2.04  | 1.85  | 2.30  | 1.82  |
| CHO                   | 31  | 3.11   | 2.17  | 2.44  | 2.43  | 2.38  | 2.69  | 1.95  | 2.45  | 2.03  |
| HNO                   | 10  | 4.83   | 3.17  | 2.97  | 3.04  | 3.91  | 3.30  | 2.76  | 4.42  | 3.76  |
| Ionization potentials |     |        |       |       |       |       |       |       |       |       |
| Overall               | 52  | 0.46   | 0.36  | 0.36  | 0.42  | 0.45  | 0.42  | 0.32  | 0.26  | 0.44  |
| CH                    | 22  | 0.38   | 0.27  | 0.24  | 0.34  | 0.31  | 0.37  | 0.24  | 0.24  | 0.37  |
| CHN                   | 13  | 0.54   | 0.37  | 0.48  | 0.52  | 0.53  | 0.52  | 0.33  | 0.22  | 0.39  |
| CHO                   | 14  | 0.57   | 0.45  | 0.42  | 0.51  | 0.48  | 0.41  | 0.41  | 0.34  | 0.61  |
| HNO                   | 3   | 0.24   | 0.52  | 0.50  | 0.16  | 0.96  | 0.52  | 0.33  | 0.23  | 0.45  |
| Dipole moments        |     |        |       |       |       |       |       |       |       |       |
| Overall               | 63  | 0.36   | 0.24  | 0.21  | 0.28  | 0.38  | 0.38  | 0.23  | 0.25  | 0.26  |
| CH                    | 20  | 0.30   | 0.16  | 0.12  | 0.16  | 0.24  | 0.24  | 0.08  | 0.11  | 0.10  |
| CHN                   | 16  | 0.54   | 0.48  | 0.34  | 0.39  | 0.54  | 0.54  | 0.40  | 0.27  | 0.33  |
| CHO                   | 19  | 0.22   | 0.10  | 0.19  | 0.25  | 0.39  | 0.33  | 0.23  | 0.31  | 0.26  |
| HNO                   | 6   | 0.40   | 0.32  | 0.19  | 0.31  | 0.38  | 0.56  | 0.31  | 0.49  | 0.58  |
| Relative energies     |     |        |       |       |       |       |       |       |       |       |
| Overall               | 17  | 9.01   | 5.70  | 2.50  | 4.17  | 2.97  | 1.97  | 5.25  | 1.96  | 2.83  |
| CH                    | 9   | 4.34   | 2.62  | 0.65  | 1.83  | 1.19  | 1.39  | 3.20  | 0.52  | 1.08  |
| CHN                   | 3   | 9.48   | 7.37  | 4.41  | 4.71  | 2.91  | 2.17  | 6.04  | 4.09  | 5.65  |
| CHO                   | 3   | 13.22  | 7.78  | 2.34  | 9.30  | 4.17  | 3.41  | 6.63  | 3.63  | 3.91  |
| Barriers              |     |        |       |       |       |       |       |       |       |       |
| Overall               | 60  | 3.48   | 2.12  | 2.39  | 3.01  | 2.55  | 2.46  | 2.31  | 1.63  | 1.61  |
| CH                    | 20  | 4.27   | 3.31  | 3.42  | 3.25  | 3.65  | 3.32  | 2.37  | 1.69  | 2.01  |
| CHN                   | 10  | 3.20   | 1.32  | 2.15  | 3.17  | 3.39  | 3.17  | 3.03  | 1.91  | 1.51  |
| CHO                   | 25  | 2.42   | 1.42  | 1.72  | 2.07  | 1.46  | 1.56  | 1.61  | 1.50  | 1.45  |
| CHNO                  | 3   | 7.98   | 3.16  | 2.67  | 7.70  | 2.35  | 2.46  | 5.42  | 1.43  | 0.68  |

Table S12: Mean Absolute Errors in Calculated Heats of Formation (kcal/mol), Bond Lengths (Å), Bond Angles (degree), Ionization Potentials (eV), and Dipole Moments (D) for the FLUOR Set and Its Subsets: MNDO, AM1, RM1, PM $x$ , and OM $x$

| Subset                | N   | Method |       |       |       |       |       |       |       |       |
|-----------------------|-----|--------|-------|-------|-------|-------|-------|-------|-------|-------|
|                       |     | MNDO   | AM1   | RM1   | PM3   | PM6   | PM7   | OM1   | OM2   | OM3   |
| Heats of formation    |     |        |       |       |       |       |       |       |       |       |
| Overall               | 48  | 10.81  | 7.75  | 6.27  | 5.87  | 5.21  | 5.82  | 4.92  | 3.41  | 3.70  |
| CHF                   | 39  | 9.89   | 7.37  | 6.30  | 4.96  | 4.92  | 5.57  | 3.67  | 3.72  | 3.88  |
| HNOF                  | 9   | 14.79  | 9.42  | 6.12  | 9.81  | 6.48  | 6.90  | 10.32 | 2.08  | 2.93  |
| Bond lengths          |     |        |       |       |       |       |       |       |       |       |
| Overall               | 125 | 0.037  | 0.028 | 0.029 | 0.022 | 0.016 | 0.017 | 0.020 | 0.023 | 0.024 |
| CHF                   | 104 | 0.030  | 0.026 | 0.023 | 0.020 | 0.014 | 0.015 | 0.018 | 0.019 | 0.021 |
| CHNOF                 | 3   | 0.029  | 0.052 | 0.038 | 0.021 | 0.013 | 0.017 | 0.024 | 0.020 | 0.014 |
| HNOF                  | 17  | 0.080  | 0.037 | 0.063 | 0.037 | 0.026 | 0.026 | 0.032 | 0.043 | 0.044 |
| Bond angles           |     |        |       |       |       |       |       |       |       |       |
| Overall               | 69  | 3.00   | 3.16  | 2.60  | 2.75  | 2.76  | 2.55  | 1.97  | 2.23  | 1.78  |
| CHF                   | 56  | 2.59   | 2.93  | 2.43  | 2.69  | 2.64  | 2.45  | 1.88  | 2.06  | 1.61  |
| CHNOF                 | 3   | 2.89   | 3.76  | 2.21  | 3.41  | 3.76  | 2.61  | 1.30  | 2.44  | 1.75  |
| HNOF                  | 9   | 5.56   | 4.59  | 3.87  | 3.05  | 3.50  | 3.37  | 2.43  | 2.91  | 2.68  |
| Ionization potentials |     |        |       |       |       |       |       |       |       |       |
| Overall               | 39  | 0.34   | 0.53  | 0.33  | 0.39  | 0.50  | 0.46  | 0.23  | 0.26  | 0.32  |
| CHF                   | 29  | 0.33   | 0.47  | 0.33  | 0.32  | 0.36  | 0.40  | 0.20  | 0.25  | 0.29  |
| HNOF                  | 9   | 0.38   | 0.70  | 0.35  | 0.57  | 1.00  | 0.68  | 0.30  | 0.29  | 0.42  |
| Dipole moments        |     |        |       |       |       |       |       |       |       |       |
| Overall               | 39  | 0.38   | 0.31  | 0.27  | 0.29  | 0.33  | 0.29  | 0.27  | 0.31  | 0.25  |
| CHF                   | 30  | 0.41   | 0.29  | 0.26  | 0.25  | 0.31  | 0.26  | 0.31  | 0.33  | 0.24  |
| HNOF                  | 8   | 0.29   | 0.44  | 0.32  | 0.47  | 0.42  | 0.41  | 0.15  | 0.26  | 0.29  |
